# Supplementary material for: Prenatal exome sequencing analysis in fetal structural anomalies detected by ultrasonography (PAGE): a cohort study
Source: PubMed Central journal article supplement (PMC6386638; doi:10.1016/s0140-6736(18)31940-8), 2019-02-23
Supplement: mmc1.pdf [file mmc1.pdf]

# THE LANCET

## **Supplementary appendix**

This appendix formed part of the original submission and has been peer reviewed.  
We post it as supplied by the authors.

Supplement to: Lord J, McMullan DJ, Eberhardt RY, et al. Reversible encephalopathy caused by an inborn error of cobalamin metabolism. *Lancet* 2019; published online Jan 31. [http://dx.doi.org/10.1016/S0140-6736\(18\)31940-8](http://dx.doi.org/10.1016/S0140-6736(18)31940-8).

## Supplementary Information

Jenny Lord\* (1), Dominic J. McMullan\* (2), Ruth Y Eberhardt\* (1), Gabriele Rinck (1), Susan J. Hamilton (2), Elizabeth Quinlan-Jones (20), Elena Prigmore (1), Rebecca Keelagher (2), Sunayna K Best (3), Georgina K. Carey (2), Rhiannon Mellis (3), Sarah Robart (3), Ian R Berry (4), Kate E. Chandler (5), Deirdre Cilliers (23), Lara Cresswell (6), Sandra L Edwards (7), Carol Gardiner (18), Alex Henderson (8), Simon T. Holden (9), Tessa Homfray (10), Tracy Lester (24), Rebecca A Lewis (14), Ruth Newbury-Ecob (11), Katrina Prescott (12), Oliver Quarrell (13), Simon Ramsden (5), Eileen Roberts (14), Dagmar Tapon (15), Madeleine J Tooley (11), Pradeep C. Vasudevan (6), Astrid P. Weber (16), Diana G. Wellesley (17), Paul Westwood (18), Helen White (17), Prenatal Assessment of Genomes and Exomes Study (1), Michael Parker (19), Denise Williams (2), Lucy Jenkins (3), Richard H. Scott (3), Mark D. Kilby\*\*+(20,21), Lyn S. Chitty\*\*+(3), Matthew E. Hurles\*\* (1), Eamonn R. Maher\*\*+(9, 22)

\*joint first authors

\*\* senior co-authors

+Full professors

1. Wellcome Sanger Institute, Hinxton, Cambridge CB10 1SA, United Kingdom
2. West Midlands Regional Genetics Service, Birmingham Women's and Children's NHS Foundation Trust, Birmingham B15 2TG, UK
3. UCL Great Ormond Street Institute of Child Health and North East Thames Regional Genetics Service, Great Ormond Street NHS Foundation Trust, London UK
4. Yorkshire Regional Genetics Service, The Leeds Genetics Laboratory, St. James's University Hospital, Leeds LS9 7TF, UK
5. Manchester Centre for Genomic Medicine, Manchester University Hospitals NHS Foundation Trust, Manchester Academic Health Science Centre, Manchester, UK

6. University Hospitals of Leicester NHS Trust, Leicester Royal Infirmary, Leicester  
LE1 5WW, UK
7. Cytogenetics Department, Norfolk & Norwich University Hospital Foundation Trust, Norwich  
NR4 7UY, UK
8. Northern Genetics Service, Newcastle upon Tyne Hospitals NHS Foundation Trust, UK
9. Department of Clinical Genetics, Cambridge University Hospitals NHS Foundation Trust,  
Cambridge, CB2 0QQ, UK
10. Southwest Thames Regional Genetics Centre, St George's Healthcare NHS Trust, London  
SW17 0RE, UK
11. Department of Clinical Genetics, St Michael's Hospital, Bristol BS2 8EG
12. Yorkshire Regional Genetics Service, Chapel Allerton Hospital, Leeds, LS7 4SA, UK
13. Department of Clinical Genetics, Sheffield Children's Hospital, Sheffield UK S10 2TH
14. Bristol Genetics Laboratory, North Bristol NHS Trust, Southmead Hospital, Bristol BS10 5NB,  
UK
15. Queen Charlotte's and Chelsea Hospital, Imperial College Healthcare NHS Trust, London W12  
0HS, UK
16. Department of Clinical Genetics, Liverpool Women's NHS Foundation Trust, Liverpool, UK
17. Faculty of Medicine, University of Southampton and Wessex Clinical Genetics Service,  
Southampton, United Kingdom
18. West of Scotland Genetics Services, Queen Elizabeth University Hospital, Glasgow G51 4TF,  
UK
19. Wellcome Centre for Ethics and Humanities and The Ethox Centre, University of Oxford,  
Oxford, UK
20. West Midlands Fetal Medicine Centre, Birmingham Women's and Children's Foundation  
Trust, Birmingham B15 2TG, UK.

21. Centre for Women's & Newborn Health, Institute of Metabolism & Systems Research,  
University of Birmingham, B15 2TT.
22. Department of Medical Genetics, University of Cambridge and NIHR Cambridge Biomedical  
Research Centre, Cambridge CB2 0QQ, UK
23. Oxford Centre for Genomic Medicine, ACE Building, Nuffield Orthopaedic Centre, Oxford,  
OX3 7LD, UK
24. Oxford Regional Genetics Services, Oxford University Hospitals, The Churchill Hospital,  
Oxford, OX3 7LE, UK

Correspondence to: [erm1000@medschl.cam.ac.uk](mailto:erm1000@medschl.cam.ac.uk)

## Contents

1. Supplementary Methods
  - Exome sequencing, Variant detection, Annotation and Quality control
2. Supplementary results
  - Variant assessments
3. Supplementary Tables
  - Supplementary Table 1: Previous reports of whole exome sequencing for fetal structural anomalies
  - Supplementary Table 2: Details of developmental disorder gene panel
  - Supplementary Table 3: Classification of fetal structural anomaly phenotypes
  - Supplementary Table 4: Single nucleotide variants (SNVs) and indels reviewed by Clinical Review Panel
  - Supplementary Table 5: Copy number variants (CNVs) and uniparental disomies (UPDs) reviewed by Clinical Review Panel
  - Supplementary Table 6: Fetal outcomes and phenotypic classes
  - Supplementary Table 7: Details of cases with non-diagnostic but potentially clinically relevant variants
  - Supplementary Table 8: Percent of protein coding region covered by  $\geq 13X$  for DDG2P gene panel.
4. Supplementary Figures
  - Supplementary Figure 1: Organisational chart illustrating the role of the clinical review panel in the assessment of genetic variants detected in the PAGE study
  - Supplementary Figure 2: Simplified (omitting quality control steps) overview of the bioinformatics pipeline.
5. Supplementary Case Studies
  - Case 1: *TUBB* variant
  - Case 2: *KMT2D* variant
  - Case 3: *MYCN* variant
6. References for supplementary materials

## 1. Supplementary Methods

Exome sequencing, variant detection and annotation: After receipt of DNA samples at the Wellcome Sanger Institute for WES genomic DNA (~125ng) was fragmented to an average size of 150 base pairs (bp) and DNA libraries were prepared and processed using standard Illumina methodologies. A portion of each library was used to create an equimolar pool comprising 8 indexed libraries. For each pool exome capture was undertaken with the Agilent SureSelect XT Human All Exon V5 Plus with custom ELID#0337431 (Agilent Technologies, Santa Clara, CA, USA) and analysed by 75-base paired-end sequencing (with 6 samples per lane on Illumina HiSeq 2500) following the manufacturer's instructions.

Mapping of short-read sequences was performed with the Burrows-Wheeler aligner (BWA; version 0.59) 41 backtrack algorithm with the GRCh37 1000 Genomes Project phase 2 reference (also known as hs37d5). Single nucleotide variants (SNVs) and indels were identified from CRAM data using the Genome Analysis Toolkit (GATK) HaplotypeCaller version 3.5 (Van der Auwera 2013). DeNovoGear (Ramu et al. 2013) was used to identify candidate *de novo* variants. Copy number variations (CNVs) were detected using CoNVex ([http://www.uk10k.org/assets/ashg\\_vijayarangakannan\\_etal\\_2012.pdf](http://www.uk10k.org/assets/ashg_vijayarangakannan_etal_2012.pdf)), and inheritance predicted with CIPHER (<https://github.com/jeremymcrae/cifer>). Outputs from GATK haplotype caller, DeNovoGear and CoNVex were merged into a single variant call format (VCF) file per trio and annotated with allele frequencies from the Exome Aggregation Consortium (ExAC) (Lek et al. 2016), the 1000 Genomes Project (1000 Genomes Project Consortium 2015), UK10K (UK10K Consortium 2015), the Exome Sequencing Project (ESP) (Exome Variant Server, NHLBI GO Exome Sequencing Project (ESP), Seattle, WA (URL: <http://evs.gs.washington.edu/EVS/>) (accessed Jan 2013), and from unaffected parents from the Deciphering Developmental Disorders (DDD) and PAGE studies. Ensembl's Variant Effect Predictor (VEP version 85) (McLaren et al. 2016) was used to annotate the predicted effect of each variant. UPD was identified using UPDio (King et al. 2014). The bioinformatics pathway is summarised in supplementary Figure 2.

Quality control (QC) was performed on all VCF files to exclude samples where exome sequencing was of poor quality and to exclude potentially contaminated samples. Upon receipt of samples at the Wellcome Sanger Institute, a Fluidigm genotyping panel of 57 SNVs was run, allowing verification of fetal sex and family structure. Once VCF files were generated, these Fluidigm variants were used as a QC measure, with any samples in which a <80% match to Fluidigm genotypes was observed across at least 14 called sites failing QC. Any samples with <80,000 total variants failed QC. QC

failures had exome sequencing repeated. If a fetal sample failed, analysis of the trio was delayed until new sequencing data was available. If a parental sample failed, the family was analysed as a dyad until the additional parent's data became available, when trio analysis could be conducted.

A number of additional QC metrics were checked: total reads in CRAM file, total homozygous and heterozygous calls (SNVs and indels), proportion of variant calls that were common, number of variants falling into different VEP annotated consequence categories, number of extreme heterozygotes ((alternate allele proportion  $<0.15$  or  $>0.8$ ), as these can be indicative of sample contamination), kinship (King (Manichaikul et al. 2010) and PCrelate (Conomos et al. 2016)) and autozygosity (BCFtools/RoH; Narasimhan et al 2016)), and outliers were flagged but not necessarily repeat sequenced. Autosomal variants with genotype quality (GQ)  $<50$  were validated in house before reporting to clinical review panel/team (CRP). When calling *de novo* mutations (DNMs), samples with excess ( $>50$ ) high quality DNMs (pp\_dnm  $>0.9$  and MAF  $<0.01$ ) were flagged, and any DNMs with pp\_dnm  $<0.1$  were validated in house before reporting to CRP. For CNVs, total CNVs per individual were plotted against the fraction overlapping common CNVs, and quality metrics from CoNVex (mean and MADs) were plotted, allowing the identification of outliers. Any deletions/duplications supported by  $\leq 3$  probes (which have high false positive rates) were validated in house before reporting to CRP.

Variants were filtered to identify those of potential clinical significance. Protein-altering variants were selected using VEP annotation and common variants were excluded using minor allele frequencies. A developmental disorder-associated gene list ([www.ebi.ac.uk/gene2phenotype](http://www.ebi.ac.uk/gene2phenotype); downloaded in February 2018) (Wright et al. 2015) was modified to exclude genes without a prenatal phenotype, and supplemented with 117 genes identified from the literature and deemed to be robustly associated with a prenatal phenotype (Supplementary Table 2). Rare, protein altering variants in genes in this list where the inheritance pattern of the variant matches that of the gene were selected for clinical review.

Filtering by MAF was a two-step process. Firstly variants were filtered using ExAC, 1000 genomes, UK10K, ESP and DDD unaffected parents. All variants with a MAF of  $> 0.005$  were excluded, biallelic variants and those with multiple inheritance types beneath this threshold pass the MAF filter. More stringent filters were used for other variants depending on the availability of parent data: if both parents were present a threshold of 0.0005 was used, and if data for one or both parents was missing a threshold of 0.0001 was used. These thresholds are in line with those used in the DDD study. In addition we filtered on a MAF from PAGE unaffected parents. Because of the size of the PAGE dataset the maximum value of this MAF when a variant was only observed in one unaffected

parent was 0.000463, therefore the above thresholds were too stringent and a maximum allele frequency of 0.01 was used.

During the course of the study, we became aware of a missed diagnosis (a *RIT1* mutation) which failed bioinformatic filtering because it was inherited from an apparently unaffected parent. However, the variant was a known disease causing mutation, and should not have been overlooked. We implemented a “whitelist” strategy, developed by Panayiotis Constantinou for the DDD project. We established a list of ClinVar variants with 2\* (criteria provided, multiple submitters with no conflict) or 3\* (reviewed by expert panel) status and reviewed these variants within the PAGE data, regardless of inheritance and parental affected status.

## **2. Supplementary Results**

Variant Assessments: The 321 genetic variants, representing 255 potential diagnoses in 205 individuals that satisfied the filtering criteria and were reviewed by the clinical review panel (CRP) are detailed in Supplementary Table 4). In summary these variants consisted 301 SNV/indel variants in 192 probands, 18 CNVs and two instances of UPDs. Of the 301 SNVs/indels, 102 were in autosomal monoallelic disease genes, 151 in autosomal biallelic disease genes (26 homozygous variants, and 125 variants in compound heterozygous state, giving 61 potential diagnoses, including two individuals with a CNV affecting one allele and a missense variant the other, and five instances where three variants meeting filtering criteria were observed in a biallelic gene in a single individual), and 48 were in genes on the X-chromosome.

Of the 301 SNV/indel variants reviewed, 47 were protein truncating variants (15 stop gained, 8 essential splice site and 24 frameshift; 19 DNMs, 14 inherited variants as part of compound heterozygous events, 9 biallelic inherited homozygous variants, 1 inherited variant in an imprinted gene, 1 inherited from a potentially similarly affected parent, 1 X-linked inherited hemizygous variant in a male fetus, and 2 of uncertain inheritance), 12 were inframe insertions or deletions (2 DNMs, 5 inherited variants in compound heterozygous state, 3 X-linked inherited variants in hemizygous state, and 2 of uncertain inheritance), and 242 were missense variants (59 DNMs, 106 inherited variants in compound heterozygous state, 17 biallelic inherited homozygous variants, 6 variants inherited from potentially similarly affected parents, 3 variants inherited from apparently unaffected parents, 36 inherited X-linked variants in hemizygous state, and 15 of uncertain inheritance).



## 1. Supplementary Tables

**Supplementary Table 1:** Summary of previously published WES studies for fetal anomalies. Genes in bold were also identified as harbouring diagnostic variants in the current cohort. Genes underlined have been reported to contain diagnostic variants in multiple previous publications but not in the PAGE cohort.

| Study                     | Subjects | Diagnostic rate | Comments                                                                                                                                                     | Genes considered to have diagnostic variants                                                                                                                                                                                                                                               |
|---------------------------|----------|-----------------|--------------------------------------------------------------------------------------------------------------------------------------------------------------|--------------------------------------------------------------------------------------------------------------------------------------------------------------------------------------------------------------------------------------------------------------------------------------------|
| Yates et al (2017)        | 84       | 20%             | Diagnostic rate for trio analysis 24%. Fetuses selected for USS anomalies that were terminated or resulted in fetal demise.                                  | <i>AMER1</i> , <i>BBS4</i> , <i>CYP11A1</i> , <i>FANCB</i> , <i>FGFR2</i> , <i>FLNA</i> , <i>FOXP3</i> , <i>L1CAM</i> , <i>HRAS</i> , <i>MRPS22</i> , <b><i>PIEZO1</i></b> , <b><i>PIK3CA</i></b> , <i>PIK3R2</i> , <b><i>PTPN11</i></b> , <i>RIPK4</i> , <i>RIT1</i> , <b><i>SOX9</i></b> |
| Vora et al. (2017)        | 15       | 47%             | Recruitment criteria included “a pattern of anomalies highly suggestive of an underlying genetic disorder” and “diagnostic rate” includes possible diagnoses | <b><i>COL1A1</i></b> , <b><i>DYNC2H1</i></b> , <i>KCTD1</i> , <i>MUSK</i> , <b><i>PIEZO1</i></b> , <i>RTTN</i> , <u><i>TMEM67</i></u>                                                                                                                                                      |
| Pangalos et al. (2016)    | 14       | 43%             | In 3 cases diagnosis was aided by testing of other affected relatives/fetuses                                                                                | <i>ASS1</i> , <i>COL3A1</i> , <b><i>EVC2</i></b> , <i>NEB</i> , <b><i>PTPN11</i></b> , <i>PROKR2</i>                                                                                                                                                                                       |
| Alamillo et al. (2015)    | 7        | 57%             | 3 cases categorised as ‘positive’ results and one as ‘likely positive’.                                                                                      | <i>COL1A2</i> , <i>GBE1</i> , <u><i>OFD1</i></u> , <b><i>RAPSN</i></b>                                                                                                                                                                                                                     |
| Westerfield et al. (2015) | 10       | 30%             |                                                                                                                                                              | <b><i>NIPBL</i></b> , <u><i>TMEM67</i></u> , <i>WDR19</i>                                                                                                                                                                                                                                  |
| Drury et al. (2015)       | 24       | 21%             | 14 cases WES performed on fetal DNA only, 10 cases trio sequenced.                                                                                           | <i>ACTB</i> , <i>ALPL</i> , <u><i>COL2A1</i></u> , <i>FLT4</i> , <i>MYH3</i>                                                                                                                                                                                                               |
| Carss et al. (2014)       | 30       | 10%             | A further 5 (17%) cases had potentially pathogenic variants requiring further investigation                                                                  | <u><i>COL2A1</i></u> , <i>FGFR3</i> , <u><i>OFD1</i></u>                                                                                                                                                                                                                                   |
| Yang et al. (2014)        | 11       | 55%             |                                                                                                                                                              | <i>ALG12</i> , <i>DOK7</i> , <b><i>KMT2D</i></b> , <i>PEX1</i> , <i>PEX12</i> , <u><i>TMEM67</i></u>                                                                                                                                                                                       |
| Yang et al. (2013)        | 4        | 25%             |                                                                                                                                                              | <b><i>NIPBL</i></b>                                                                                                                                                                                                                                                                        |

**Supplementary Table 2:** Variants were analysed in the 1511 developmental disorder genes included in the DDG2P panel ([www.ebi.ac.uk/gene2phenotype](http://www.ebi.ac.uk/gene2phenotype)) (downloaded February 2018), plus 117 genes identified as being associated with a prenatal presentation from the literature (see below)

\*pLI = probability of loss of function intolerance

\*\*No Ensembl protein coding transcript in GRCh37

| Gene name       | Gene MIM | Expected mode | Expected mechanism | pLI*   | Percent of protein coding region covered by >=13X |
|-----------------|----------|---------------|--------------------|--------|---------------------------------------------------|
| <i>ABCA12</i>   | 607800   | Biallelic     | Loss of function   | 0.0000 | 98.37                                             |
| <i>ABCC8</i>    | 600509   | Monoallelic   | uncertain          | 0.0000 | 99.98                                             |
| <i>ACE</i>      | 106180   | Biallelic     | Loss of function   | 0.0000 | 100.00                                            |
| <i>ACTG2</i>    | 102545   | Monoallelic   | Uncertain          | 0.6920 | 97.79                                             |
| <i>ADAMTS10</i> | 608990   | Biallelic     | Loss of function   | 0.9803 | 100.00                                            |
| <i>ADAMTS17</i> | 607511   | Biallelic     | Loss of function   | 0.0000 | 100.00                                            |
| <i>ADAMTSL2</i> | 612277   | Biallelic     | Loss of function   | 0.0711 | 92.70                                             |
| <i>AGPAT2</i>   | 603100   | Biallelic     | Loss of function   | 0.0002 | 94.50                                             |
| <i>AGRN</i>     | 103320   | Biallelic     | Loss of function   | 0.1734 | 92.38                                             |
| <i>ANOS1</i>    | 300836   | Hemizygous    | Loss of function   | 0.9386 | 87.20                                             |
| <i>AP3B1</i>    | 603401   | Biallelic     | Loss of function   | 0.9954 | 95.83                                             |
| <i>ARL13B</i>   | 608922   | Biallelic     | Loss of function   | 0.0000 | 100.00                                            |

|                 |        |                       |                       |        |        |
|-----------------|--------|-----------------------|-----------------------|--------|--------|
| <i>ASNS</i>     | 108370 | Biallelic             | All missense/in frame | 0.0017 | 89.79  |
| <i>ATP6V0A2</i> | 611716 | Biallelic             | Loss of function      | 0.0000 | 100.00 |
| <i>B3GAT3</i>   | 606374 | Biallelic             | Loss of function      | 0.0003 | 97.72  |
| <i>B3GLCT</i>   | 606374 | Biallelic             | Loss of function      | 0.0000 | 99.40  |
| <i>CAVIN1</i>   | 603198 | Biallelic             | Loss of function      | 0.0209 | 100.00 |
| <i>CDAN1</i>    | 607465 | Biallelic             | Loss of function      | 0.9281 | 100.00 |
| <i>CEP164</i>   | 614848 | Biallelic             | Loss of function      | 0.0000 | 97.38  |
| <i>CFTR</i>     | 602421 | Biallelic             | Loss of function      | 0.0000 | 97.28  |
| <i>CHAT</i>     | 118490 | Biallelic             | Loss of function      | 0.0140 | 100.00 |
| <i>CHKB</i>     | 612395 | Biallelic             | Loss of function      | 0.0006 | 100.00 |
| <i>CHRND</i>    | 100720 | Biallelic             | Loss of function      | 0.0000 | 100.00 |
| <i>COL1A2</i>   | 120160 | Biallelic/Monoallelic | Loss of function      | 0.9998 | 100.00 |
| <i>COL5A1</i>   | 120215 | Monoallelic           | Loss of function      | 1.0000 | 99.23  |
| <i>COL5A2</i>   | 120190 | Monoallelic           | Loss of function      | 1.0000 | 100.00 |
| <i>COL6A2</i>   | 120240 | Biallelic/Monoallelic | Loss of function      | 0.0021 | 100.00 |
| <i>CPT2</i>     | 600650 | Biallelic             | Loss of function      | 0.0000 | 98.79  |

|                |        |                       |                       |        |        |
|----------------|--------|-----------------------|-----------------------|--------|--------|
| <i>CRLF1</i>   | 604237 | Biallelic             | Loss of function      | 0.0269 | 91.77  |
| <i>CRTAP</i>   | 605497 | Biallelic             | Loss of function      | 0.0001 | 99.32  |
| <i>CYP11A1</i> | 118485 | Biallelic             | Loss of function      | 0.0000 | 92.90  |
| <i>CYP11B1</i> | 610613 | Biallelic/Monoallelic | Loss of function      | 0.0014 | 100.00 |
| <i>CYP17A1</i> | 609300 | Biallelic             | Loss of function      | 0.0350 | 100.00 |
| <i>CYP21A2</i> | 613815 | Biallelic             | Loss of function      | 0.6723 | 87.30  |
| <i>DNAAF1</i>  | 613190 | Biallelic             | Loss of function      | 0.0000 | 99.27  |
| <i>DNAH11</i>  | 603339 | Biallelic             | Loss of function      | NA     | 100.00 |
| <i>DNAH5</i>   | 603335 | Biallelic             | Loss of function      | 0.0000 | 100.00 |
| <i>DNAI1</i>   | 604366 | Biallelic             | Loss of function      | 0.0001 | 100.00 |
| <i>DSP</i>     | 125647 | Biallelic/Monoallelic | uncertain             | 0.9999 | 99.82  |
| <i>EMD</i>     | 300384 | Hemizygous            | Loss of function      | 0.8444 | 100.00 |
| <i>EMG1</i>    | 611531 | Biallelic             | All missense/in frame | 0.0106 | 100.00 |
| <i>EPHB4</i>   | 600011 | Monoallelic           | Loss of function      | 0.9899 | 100.00 |
| <i>FBLN5</i>   | 604580 | Biallelic             | All missense/in frame | 0.9958 | 99.63  |
| <i>FGF8</i>    | 600483 | Monoallelic           | uncertain             | 0.9272 | 89.58  |

|                |        |             |                       |        |              |
|----------------|--------|-------------|-----------------------|--------|--------------|
| <i>G6PC3</i>   | 611045 | Biallelic   | Loss of function      | 0.0000 | 100.00       |
| <i>GBE1</i>    | 607839 | Biallelic   | Loss of function      | 0.0000 | 100.00       |
| <i>GPI</i>     | 172400 | Biallelic   | All missense/in frame | 0.0016 | 100.00       |
| <i>GRIP1</i>   | 604597 | Biallelic   | Loss of function      | 0.9169 | 100.00       |
| <i>H19</i>     | 103280 | Monoallelic | uncertain             | NA     | No protein** |
| <i>HES7</i>    | 608059 | Biallelic   | Loss of function      | 0.7829 | 81.39        |
| <i>HSD17B3</i> | 605573 | Biallelic   | Loss of function      | 0.0000 | 100.00       |
| <i>IER3IP1</i> | 609382 | Biallelic   | Loss of function      | 0.0184 | 77.51        |
| <i>INSR</i>    | 147670 | Biallelic   | Loss of function      | 0.1865 | 100.00       |
| <i>INVS</i>    | 243305 | Biallelic   | Loss of function      | 0.0000 | 100.00       |
| <i>IQCB1</i>   | 609237 | Biallelic   | Loss of function      | 0.0000 | 76.67        |
| <i>ITGA6</i>   | 147556 | Biallelic   | Loss of function      | 0.0099 | 100.00       |
| <i>ITGB4</i>   | 147557 | Biallelic   | Loss of function      | 0.0000 | 94.32        |
| <i>KCNJ1</i>   | 600359 | Biallelic   | Loss of function      | 0.0017 | 100.00       |
| <i>KCNJ2</i>   | 600681 | Monoallelic | Loss of function      | 0.8202 | 100.00       |
| <i>KISS1R</i>  | 604161 | Biallelic   | Loss of function      | 0.0040 | 100.00       |

|               |        |                       |                  |        |        |
|---------------|--------|-----------------------|------------------|--------|--------|
| <i>KLHL41</i> | 607701 | Biallelic             | Loss of function | 0.0188 | 100.00 |
| <i>LIFR</i>   | 151443 | Biallelic             | Loss of function | 0.0010 | 99.12  |
| <i>LMBR1</i>  | 605522 | Biallelic/Monoallelic | Loss of function | 0.0007 | 100.00 |
| <i>LMOD3</i>  | 616112 | Biallelic             | Loss of function | 0.0081 | 99.47  |
| <i>LTBP4</i>  | 604710 | Biallelic             | Loss of function | 0.9904 | 100.00 |
| <i>LZTFL1</i> | 606568 | Biallelic             | Loss of function | 0.1941 | 100.00 |
| <i>MBTPS2</i> | 300294 | Hemizygous            | Loss of function | 0.9402 | 98.40  |
| <i>MLH1</i>   | 120436 | Biallelic/Monoallelic | Loss of function | 0.7396 | 99.96  |
| <i>MSH2</i>   | 609309 | Biallelic/Monoallelic | Loss of function | 0.8677 | 97.29  |
| <i>MSH6</i>   | 600678 | Biallelic/Monoallelic | Loss of function | NA     | 100.00 |
| <i>MUSK</i>   | 601296 | Biallelic             | Loss of function | 0.0001 | 100.00 |
| <i>MYBPC1</i> | 160794 | Biallelic/Monoallelic | Loss of function | 0.6579 | 100.00 |
| <i>NHEJ1</i>  | 611290 | Biallelic             | Loss of function | 0.0272 | 91.56  |
| <i>NROB1</i>  | 300473 | X-linked dominant     | Loss of function | 0.7920 | 100.00 |
| <i>OCLN</i>   | 602876 | Biallelic             | Loss of function | 0.4910 | 100.00 |
| <i>OSTM1</i>  | 607649 | Biallelic             | Loss of function | 0.0605 | 90.25  |

|               |        |                       |                  |        |        |
|---------------|--------|-----------------------|------------------|--------|--------|
| <i>PIEZO1</i> | 611184 | Biallelic/Monoallelic | Loss of function | 0.5360 | 97.71  |
| <i>PKD1</i>   | 601313 | Monoallelic           | Loss of function | 0.9999 | 31.19  |
| <i>PKD2</i>   | 173910 | Monoallelic           | Loss of function | 0.9953 | 96.61  |
| <i>PKLR</i>   | 609712 | Biallelic             | Loss of function | 0.0000 | 98.96  |
| <i>POMK</i>   | 615247 | Biallelic             | Loss of function | 0.0005 | 100.00 |
| <i>POR</i>    | 124015 | Biallelic             | Loss of function | 0.0000 | 98.83  |
| <i>PPIB</i>   | 123841 | Biallelic             | Loss of function | 0.0107 | 100.00 |
| <i>PRG4</i>   | 604283 | Biallelic             | Loss of function | 0.4693 | 100.00 |
| <i>PROK2</i>  | 607002 | Biallelic/Monoallelic | Loss of function | 0.2705 | 100.00 |
| <i>PROKR2</i> | 607123 | Monoallelic           | uncertain        | 0.0007 | 100.00 |
| <i>REN</i>    | 179820 | Biallelic             | Loss of function | 0.0066 | 100.00 |
| <i>ROBO1</i>  | 602430 | Monoallelic           | Loss of function | 0.0000 | 100.00 |
| <i>RPL11</i>  | 604175 | Monoallelic           | Loss of function | 0.7258 | 95.53  |
| <i>RPL5</i>   | 603634 | Monoallelic           | Loss of function | 0.9948 | 57.05  |
| <i>RPS10</i>  | 603632 | Monoallelic           | Loss of function | 0.9465 | 88.96  |
| <i>RPS17</i>  | 180472 | Monoallelic           | Loss of function | NA     | 55.88  |

|                |        |             |                  |        |              |
|----------------|--------|-------------|------------------|--------|--------------|
| <i>RPS26</i>   | 603701 | Monoallelic | Loss of function | 0.7533 | 76.72        |
| <i>SELENON</i> | 606210 | Biallelic   | Loss of function | 0.0000 | 83.70        |
| <i>SGCA</i>    | 600119 | Biallelic   | Loss of function | 0.1944 | 100.00       |
| <i>SLC12A1</i> | 600839 | Biallelic   | Loss of function | 0.0000 | 100.00       |
| <i>SLC26A3</i> | 126650 | Biallelic   | Loss of function | 0.0000 | 100.00       |
| <i>SMN1</i>    | 600354 | Biallelic   | Loss of function | 0.1010 | 93.33        |
| <i>SOST</i>    | 605740 | Biallelic   | Loss of function | 0.3796 | 98.91        |
| <i>SP110</i>   | 604457 | Biallelic   | Loss of function | 0.0000 | 100.00       |
| <i>SRD5A2</i>  | 607306 | Biallelic   | Loss of function | NA     | No protein** |
| <i>SUFU</i>    | 607035 | Monoallelic | Loss of function | 0.9992 | 98.79        |
| <i>TBC1D20</i> | 611663 | Biallelic   | Loss of function | 0.9126 | 99.91        |
| <i>TBX6</i>    | 602427 | Monoallelic | Loss of function | 0.0291 | 97.33        |
| <i>TCIRG1</i>  | 604592 | Biallelic   | Loss of function | 0.0000 | 91.18        |
| <i>TCTN1</i>   | 609863 | Biallelic   | Loss of function | 0.0000 | 97.04        |
| <i>TGIF1</i>   | 602630 | Monoallelic | Loss of function | 0.0908 | 100.00       |
| <i>TGM1</i>    | 190195 | Biallelic   | Loss of function | 0.0000 | 100.00       |



|                |        |                       |                  |        |        |
|----------------|--------|-----------------------|------------------|--------|--------|
| <i>TMEM138</i> | 614459 | Biallelic             | Loss of function | 0.5311 | 100.00 |
| <i>TMEM231</i> | 614949 | Biallelic             | Loss of function | 0.0001 | 97.69  |
| <i>TNNI2</i>   | 191043 | Monoallelic           | Loss of function | 0.0862 | 100.00 |
| <i>TNNT1</i>   | 191041 | Biallelic             | Loss of function | 0.0000 | 98.91  |
| <i>TNXB</i>    | 600985 | Biallelic/Monoallelic | Loss of function | 0.7742 | 90.01  |
| <i>TPM3</i>    | 191030 | Biallelic/Monoallelic | Loss of function | 0.1920 | 98.25  |
| <i>TTC21B</i>  | 612014 | Biallelic             | Loss of function | 0.0000 | 95.06  |
| <i>UBA1</i>    | 314370 | Hemizygous            | Loss of function | 1.0000 | 100.00 |
| <i>ZNF423</i>  | 604557 | Biallelic/Monoallelic | Loss of function | 0.9905 | 100.00 |

**Supplementary Table 3:** Classification of fetal structural anomaly phenotypes

|                            |                                                                                                           |
|----------------------------|-----------------------------------------------------------------------------------------------------------|
| <b>Abdominal</b>           | <b>Omphalocele, gastroschisis, echogenic bowel, bowel obstruction</b>                                     |
| <b>Brain</b>               | <b>Ventriculomegaly (mild persistent and resolving), posterior fossa cysts, other major CNS anomalies</b> |
| <b>Cardiac</b>             | <b>Any cardiac malformation or variant</b>                                                                |
| <b>Chest</b>               | <b>Cystic lung lesions, diaphragmatic hernia</b>                                                          |
| <b>Facial</b>              | <b>Cleft lip +/- palate</b>                                                                               |
| <b>Hydrops</b>             | <b>Pleural effusions, ascites, generalised skin oedema</b>                                                |
| <b>Isolated NT &gt;4mm</b> | <b>Increased nuchal translucency (NT)</b>                                                                 |
| <b>Multisystem</b>         | <b>All cases with more than one structural anomaly</b>                                                    |
| <b>Renal</b>               | <b>Echogenic or absent kidneys, hydronephrosis, outflow obstruction</b>                                   |
| <b>Skeletal</b>            | <b>Talipes, transverse limb defects, radial ray defects, contractures, suspected skeletal dysplasias</b>  |
| <b>Spinal</b>              | <b>Hemivertebrae, spinabifida</b>                                                                         |

**Supplementary Table 4:** Single nucleotide variants (SNVs) and indels reviewed by Clinical Review  
Panel (hg19 coordinates)

| EGA_ID          | PP_ID  | Phenotypic Class | Fetal sex | Chr | Pos       | Ref | Alt | Gene    | Variant Type            | Inheritance                          | Zygoty                | Review Outcome                |
|-----------------|--------|------------------|-----------|-----|-----------|-----|-----|---------|-------------------------|--------------------------------------|-----------------------|-------------------------------|
| EGAN00001366413 | PP0087 | Skeletal         | F         | 11  | 103057046 | C   | T   | DYNC2H1 | stop_gained             | Inherited                            | Compound heterozygous | Diagnostic                    |
| EGAN00001366413 | PP0087 | Skeletal         | F         | 11  | 103060543 | C   | T   | DYNC2H1 | stop_gained             | Inherited                            | Compound heterozygous | Diagnostic                    |
| EGAN00001366649 | PP0099 | Spinal           | M         | 10  | 73567140  | C   | T   | CDH23   | missense_variant        | Inherited                            | Compound heterozygous | Not relevant                  |
| EGAN00001366649 | PP0099 | Spinal           | M         | 10  | 73468926  | C   | T   | CDH23   | missense_variant        | Inherited                            | Compound heterozygous | Not relevant                  |
| EGAN00001366670 | PP0120 | Skeletal         | M         | 1   | 5964799   | C   | A   | NPHP4   | missense_variant        | Inherited                            | Compound heterozygous | Not relevant                  |
| EGAN00001366670 | PP0120 | Skeletal         | M         | 1   | 5937203   | G   | A   | NPHP4   | missense_variant        | Inherited                            | Compound heterozygous | Not relevant                  |
| EGAN00001366679 | PP0129 | Skeletal         | M         | X   | 32456380  | C   | T   | DMD     | missense_variant        | Inherited from unaffected mother (X) | Hemizygous            | Not relevant                  |
| EGAN00001366679 | PP0129 | Skeletal         | M         | X   | 153589917 | T   | C   | FLNA    | missense_variant        | Inherited from unaffected mother (X) | Hemizygous            | Potentially clinically useful |
| EGAN00001366705 | PP0156 | Hydrops          | M         | 19  | 50831536  | C   | A   | KCNC3   | missense_variant        | Uncertain (dyad)                     | Heterozygous          | Not relevant                  |
| EGAN00001366705 | PP0156 | Hydrops          | M         | 2   | 50758415  | G   | A   | NRXN1   | missense_variant        | Uncertain (dyad)                     | Heterozygous          | Not relevant                  |
| EGAN00001366705 | PP0156 | Hydrops          | M         | 6   | 137193340 | C   | T   | PEX7    | missense_variant        | Uncertain (dyad)                     | Heterozygous          | Not relevant                  |
| EGAN00001366705 | PP0156 | Hydrops          | M         | 6   | 137193333 | TAG | T   | PEX7    | splice_acceptor_variant | Uncertain (dyad)                     | Heterozygous          | Not relevant                  |

|                 |        |              |   |    |           |   |    |        |                    |                                      |                       |              |
|-----------------|--------|--------------|---|----|-----------|---|----|--------|--------------------|--------------------------------------|-----------------------|--------------|
| EGAN00001366705 | PP0156 | Hydrops      | M | 3  | 114070407 | A | G  | ZBTB20 | missense_variant   | Uncertain                            | Heterozygous          | Not relevant |
| EGAN00001366711 | PP0162 | Hydrops      | F | 6  | 51798959  | G | A  | PKHD1  | missense_variant   | Inherited                            | Compound heterozygous | Not relevant |
| EGAN00001366711 | PP0162 | Hydrops      | F | 6  | 51524453  | T | G  | PKHD1  | missense_variant   | Inherited                            | Compound heterozygous | Not relevant |
| EGAN00001366717 | PP0168 | Cardiac      | M | 15 | 57544664  | A | G  | TCF12  | missense_variant   | de novo                              | Heterozygous          | Not relevant |
| EGAN00001366723 | PP0174 | Multisystem  | F | 1  | 115258748 | C | G  | NRAS   | missense_variant   | de novo                              | Heterozygous          | Diagnostic   |
| EGAN00001366733 | PP0184 | Cardiac      | F | 15 | 96877607  | T | C  | NR2F2  | missense_variant   | de novo                              | Heterozygous          | Diagnostic   |
| EGAN00001366736 | PP0187 | Brain        | M | X  | 12720120  | A | G  | FRMPD4 | missense_variant   | Inherited from unaffected mother (X) | Hemizygous            | Not relevant |
| EGAN00001366736 | PP0187 | Brain        | M | X  | 153295988 | T | C  | MECP2  | missense_variant   | Inherited from unaffected mother (X) | Hemizygous            | Not relevant |
| EGAN00001366768 | PP0204 | Skeletal     | F | X  | 64139032  | T | TG | ZC4H2  | frameshift_variant | de novo                              | Heterozygous          | Diagnostic   |
| EGAN00001366769 | PP0205 | Large NT>4.0 | F | 4  | 79399020  | G | A  | FRAS1  | missense_variant   | Inherited                            | Compound heterozygous | Not relevant |
| EGAN00001366769 | PP0205 | Large NT>4.0 | F | 4  | 79443878  | T | C  | FRAS1  | missense_variant   | Inherited                            | Compound heterozygous | Not relevant |
| EGAN00001366774 | PP0207 | Renal        | M | 6  | 143095041 | T | C  | HIVEP2 | missense_variant   | de novo                              | Heterozygous          | Not relevant |
| EGAN00001366776 | PP0208 | Skeletal     | F | 15 | 48713770  | C | T  | FBN1   | missense_variant   | de novo                              | Heterozygous          | Not relevant |
| EGAN00001366757 | PP0234 | Large NT>4.0 | F | X  | 41333998  | C | A  | NYX    | missense_variant   | de novo                              | Heterozygous          | Not relevant |

|                 |        |                         |   |    |           |   |   |          |                  |                                      |                                  |                        |
|-----------------|--------|-------------------------|---|----|-----------|---|---|----------|------------------|--------------------------------------|----------------------------------|------------------------|
| EGAN00001366802 | PP0258 | Abdominal               | F | 2  | 16082533  | T | C | MYCN     | missense_variant | Inherited from affected parent       | Heterozygous                     | Diagnostic             |
| EGAN00001366802 | PP0258 | Abdominal               | F | 4  | 88957380  | G | A | PKD2     | missense_variant | Inherited from affected parent       | Heterozygous                     | Not relevant           |
| EGAN00001366808 | PP0261 | Large NT>4.0            | M | 1  | 154246309 | C | T | HAX1     | missense_variant | Inherited                            | Compound heterozygous (with CNV) | Not relevant           |
| EGAN00001366828 | PP0279 | Chest                   | M | X  | 85213969  | C | T | CHM      | missense_variant | Inherited from unaffected mother (X) | Hemizygous                       | Not relevant           |
| EGAN00001366834 | PP0285 | Large NT>4.0            | M | 17 | 41243509  | T | C | BRCA1    | missense_variant | Inherited                            | Compound heterozygous            | Not relevant           |
| EGAN00001366834 | PP0285 | Large NT>4.0            | M | 17 | 41245233  | A | G | BRCA1    | missense_variant | Inherited                            | Compound heterozygous            | Not relevant           |
| EGAN00001366834 | PP0285 | Large NT>4.0            | M | 2  | 238274569 | G | T | COL6A3   | missense_variant | Inherited                            | Compound heterozygous            | Not relevant           |
| EGAN00001366834 | PP0285 | Large NT>4.0            | M | 2  | 238275519 | C | T | COL6A3   | missense_variant | Inherited                            | Compound heterozygous            | Not relevant           |
| EGAN00001366849 | PP0300 | Facial/cleft lip+palate | M | X  | 53276312  | C | T | IQSEC2   | missense_variant | Inherited from unaffected mother (X) | Hemizygous                       | Not relevant           |
| EGAN00001366852 | PP0303 | Cardiac                 | M | 2  | 175614789 | T | C | CHRNA1   | missense_variant | Inherited                            | Compound heterozygous            | Not relevant           |
| EGAN00001366852 | PP0303 | Cardiac                 | M | 2  | 175619069 | G | T | CHRNA1   | missense_variant | Inherited                            | Compound heterozygous            | Not relevant           |
| EGAN00001366852 | PP0303 | Cardiac                 | M | X  | 64137700  | C | T | ZC4H2    | missense_variant | Inherited from unaffected mother (X) | Hemizygous                       | Not relevant           |
| EGAN00001366861 | PP0312 | Large NT>4.0            | F | 21 | 46895431  | G | C | COL18A1  | missense_variant | Inherited                            | Homozygous                       | Not relevant           |
| EGAN000013668   | PP0312 | Large NT>4.0            | F | 14 | 58923476  | A | T | KIAA0586 | missense_variant | Inherited                            | Homozygous                       | Potentially clinically |

|                 |        |              |   |    |           |     |    |          |                    |                                      |                                  |              |
|-----------------|--------|--------------|---|----|-----------|-----|----|----------|--------------------|--------------------------------------|----------------------------------|--------------|
| 61              |        |              |   |    |           |     |    |          |                    |                                      |                                  | useful       |
| EGAN00001366861 | PP0312 | Large NT>4.0 | F | 8  | 6302487   | A   | C  | MCPH1    | missense_variant   | Inherited                            | Homozygous                       | Not relevant |
| EGAN00001366861 | PP0312 | Large NT>4.0 | F | 17 | 78187976  | C   | T  | SGSH     | missense_variant   | Inherited                            | Homozygous                       | Not relevant |
| EGAN00001366864 | PP0315 | Multisystem  | F | 1  | 103548462 | G   | A  | COL11A1  | missense_variant   | Inherited                            | Compound heterozygous (with CNV) | Not relevant |
| EGAN00001366864 | PP0315 | Multisystem  | F | 14 | 74711975  | C   | T  | VSX2     | missense_variant   | Inherited                            | Homozygous                       | Not relevant |
| EGAN00001366867 | PP0318 | Skeletal     | F | 2  | 233406191 | C   | CA | CHRNA1   | frameshift_variant | Inherited                            | Homozygous                       | Diagnostic   |
| EGAN00001366892 | PP0330 | Cardiac      | M | 3  | 11059010  | C   | T  | SLC6A1   | missense_variant   | de novo                              | Heterozygous                     | Not relevant |
| EGAN00001366934 | PP0333 | Cardiac      | M | 8  | 11566037  | TG  | T  | GATA4    | frameshift_variant | de novo (presumed - (dyad)           | Heterozygous                     | Diagnostic   |
| EGAN00001366953 | PP0342 | Multisystem  | F | 2  | 233408374 | CCA | C  | CHRNA1   | frameshift_variant | Inherited                            | Compound heterozygous            | Diagnostic   |
| EGAN00001366953 | PP0342 | Multisystem  | F | 2  | 233406191 | C   | CA | CHRNA1   | frameshift_variant | Inherited                            | Compound heterozygous            | Diagnostic   |
| EGAN00001366985 | PP0360 | Skeletal     | M | X  | 73960674  | C   | T  | KIAA2022 | missense_variant   | Inherited from unaffected mother (X) | Hemizygous                       | Not relevant |
| EGAN00001366985 | PP0360 | Skeletal     | M | 18 | 7032153   | C   | T  | LAMA1    | missense_variant   | Inherited                            | Compound heterozygous            | Not relevant |
| EGAN00001366985 | PP0360 | Skeletal     | M | 18 | 7008517   | A   | T  | LAMA1    | stop_gained        | Inherited                            | Compound heterozygous            | Not relevant |
| EGAN00001366985 | PP0360 | Skeletal     | M | 17 | 62026805  | C   | A  | SCN4A    | missense_variant   | de novo                              | Heterozygous                     | Not relevant |
| EGAN00001366996 | PP0366 | Chest        | M | 14 | 92442496  | C   | A  | TRIP11   | missense_variant   | Inherited                            | Compound heterozygous            | Not relevant |

|                 |        |              |   |    |           |      |   |         |                      |                                      |                       |                               |
|-----------------|--------|--------------|---|----|-----------|------|---|---------|----------------------|--------------------------------------|-----------------------|-------------------------------|
| EGAN00001366996 | PP0366 | Chest        | M | 14 | 92477364  | A    | G | TRIP11  | missense_variant     | Inherited                            | Compound heterozygous | Not relevant                  |
| EGAN00001367002 | PP0369 | Renal        | M | X  | 153581143 | G    | A | FLNA    | missense_variant     | Inherited from unaffected mother (X) | Hemizygous            | Potentially clinically useful |
| EGAN00001367002 | PP0369 | Renal        | M | 2  | 44190789  | T    | C | LRPPRC  | missense_variant     | Inherited                            | Compound heterozygous | Not relevant                  |
| EGAN00001367002 | PP0369 | Renal        | M | 2  | 44223023  | G    | C | LRPPRC  | missense_variant     | Inherited                            | Compound heterozygous | Not relevant                  |
| EGAN00001367008 | PP0372 | Large NT>4.0 | F | 3  | 53783158  | G    | A | CACNA1D | missense_variant     | Inherited                            | Compound heterozygous | Not relevant                  |
| EGAN00001367008 | PP0372 | Large NT>4.0 | F | 3  | 53842691  | CCTT | C | CACNA1D | inframe_deletion     | Inherited                            | Compound heterozygous | Not relevant                  |
| EGAN00001367033 | PP0384 | Brain        | F | 13 | 31843415  | G    | A | B3GLCT  | splice_donor_variant | Inherited                            | Homozygous            | Diagnostic                    |
| EGAN00001367033 | PP0384 | Brain        | F | 1  | 22170712  | C    | A | HSPG2   | missense_variant     | Inherited                            | Compound heterozygous | Not relevant                  |
| EGAN00001367033 | PP0384 | Brain        | F | 1  | 22174345  | C    | T | HSPG2   | missense_variant     | Inherited                            | Compound heterozygous | Not relevant                  |
| EGAN00001367043 | PP0390 | Cardiac      | M | 17 | 42979917  | A    | C | CCDC103 | missense_variant     | Inherited                            | Homozygous            | Diagnostic                    |
| EGAN00001366872 | PP0413 | Chest        | F | 17 | 79477837  | T    | C | ACTG1   | missense_variant     | Inherited from affected parent       | Heterozygous          | Not relevant                  |
| EGAN00001366872 | PP0413 | Chest        | F | 7  | 94038703  | C    | T | COL1A2  | missense_variant     | Inherited from affected parent       | Heterozygous          | Not relevant                  |
| EGAN00001366883 | PP0419 | Skeletal     | F | 16 | 51171424  | G    | A | SALL1   | stop_gained          | de novo                              | Heterozygous          | Not relevant                  |
| EGAN00001366931 | PP0425 | Cardiac      | F | 1  | 22165358  | C    | T | HSPG2   | missense_variant     | Inherited                            | Compound heterozygous | Not relevant                  |

|                 |        |              |   |    |           |   |   |        |                  |                                      |                       |                               |
|-----------------|--------|--------------|---|----|-----------|---|---|--------|------------------|--------------------------------------|-----------------------|-------------------------------|
| EGAN00001366931 | PP0425 | Cardiac      | F | 1  | 22156041  | C | T | HSPG2  | missense_variant | Inherited                            | Compound heterozygous | Not relevant                  |
| EGAN00001366931 | PP0425 | Cardiac      | F | 16 | 70902514  | C | T | HYDIN  | missense_variant | Inherited                            | Compound heterozygous | Potentially clinically useful |
| EGAN00001366931 | PP0425 | Cardiac      | F | 16 | 71004560  | G | T | HYDIN  | missense_variant | Inherited                            | Compound heterozygous | Potentially clinically useful |
| EGAN00001366931 | PP0425 | Cardiac      | F | 9  | 131395136 | G | A | SPTAN1 | missense_variant | de novo                              | Heterozygous          | Not relevant                  |
| EGAN00001366484 | PP0434 | Cardiac      | M | 14 | 30103649  | A | G | PRKD1  | missense_variant | de novo                              | Heterozygous          | Not relevant                  |
| EGAN00001366968 | PP0443 | Large NT>4.0 | M | 2  | 152484327 | G | A | NEB    | missense_variant | Inherited                            | Compound heterozygous | Not relevant                  |
| EGAN00001366968 | PP0443 | Large NT>4.0 | M | 2  | 152524388 | T | C | NEB    | missense_variant | Inherited                            | Compound heterozygous | Not relevant                  |
| EGAN00001367048 | PP0482 | Multisystem  | M | X  | 152956861 | C | T | SLC6A8 | missense_variant | Inherited from unaffected mother (X) | Hemizygous            | Not relevant                  |
| EGAN00001367098 | PP0513 | Cardiac      | F | 7  | 21938979  | C | T | DNAH11 | stop_gained      | Inherited                            | Homozygous            | Diagnostic                    |
| EGAN00001367101 | PP0516 | Cardiac      | M | 11 | 73834139  | G | A | C2CD3  | missense_variant | Inherited                            | Compound heterozygous | Not relevant                  |
| EGAN00001367101 | PP0516 | Cardiac      | M | 11 | 73879506  | A | C | C2CD3  | missense_variant | Inherited                            | Compound heterozygous | Not relevant                  |
| EGAN00001367101 | PP0516 | Cardiac      | M | 7  | 158672528 | G | C | WDR60  | missense_variant | Inherited                            | Compound heterozygous | Not relevant                  |
| EGAN00001367101 | PP0516 | Cardiac      | M | 7  | 158663939 | A | G | WDR60  | missense_variant | Inherited                            | Compound heterozygous | Not relevant                  |
| EGAN00001367101 | PP0516 | Cardiac      | M | X  | 128940428 | G | A | ZDHHC9 | missense_variant | Inherited from unaffected mother (X) | Hemizygous            | Not relevant                  |



|                 |        |                         |   |    |           |       |     |         |                    |                                      |                       |                               |
|-----------------|--------|-------------------------|---|----|-----------|-------|-----|---------|--------------------|--------------------------------------|-----------------------|-------------------------------|
| EGAN00001367110 | PP0525 | Hydrops                 | F | 19 | 17088279  | T     | C   | CPAMD8  | missense_variant   | Inherited                            | Compound heterozygous | Not relevant                  |
| EGAN00001367110 | PP0525 | Hydrops                 | F | 19 | 17008607  | C     | G   | CPAMD8  | missense_variant   | Inherited                            | Compound heterozygous | Not relevant                  |
| EGAN00001367140 | PP0555 | Multisystem             | M | 4  | 5567006   | C     | CAA | EVC2    | frameshift_variant | Inherited                            | Homozygous            | Diagnostic                    |
| EGAN00001367140 | PP0555 | Multisystem             | M | 3  | 136002730 | C     | T   | PCCB    | missense_variant   | Inherited                            | Homozygous            | Not relevant                  |
| EGAN00001367146 | PP0561 | Brain                   | M | X  | 23411544  | AATG  | A   | PTCHD1  | inframe_deletion   | Inherited from unaffected mother (X) | Hemizygous            | Not relevant                  |
| EGAN00001367158 | PP0573 | Multisystem             | F | 17 | 18058468  | G     | A   | MYO15A  | missense_variant   | Inherited                            | Compound heterozygous | Not relevant                  |
| EGAN00001367158 | PP0573 | Multisystem             | F | 17 | 18067119  | A     | G   | MYO15A  | missense_variant   | Inherited                            | Compound heterozygous | Not relevant                  |
| EGAN00001367161 | PP0576 | Skeletal                | F | 5  | 1268700   | C     | T   | TERT    | missense_variant   | Inherited                            | Compound heterozygous | Not relevant                  |
| EGAN00001367161 | PP0576 | Skeletal                | F | 5  | 1268697   | C     | T   | TERT    | missense_variant   | Inherited                            | Compound heterozygous | Not relevant                  |
| EGAN00001367167 | PP0582 | Facial/cleft lip+palate | F | 15 | 99452099  | ACAAC | A   | IGF1R   | inframe_deletion   | de novo                              | Heterozygous          | Not relevant                  |
| EGAN00001367170 | PP0585 | Large NT>4.0            | F | 3  | 78711245  | CT    | C   | ROBO1   | frameshift_variant | de novo                              | Heterozygous          | Potentially clinically useful |
| EGAN00001366460 | PP0620 | Large NT>4.0            | M | 1  | 17312607  | G     | A   | ATP13A2 | missense_variant   | Inherited                            | Compound heterozygous | Not relevant                  |
| EGAN00001366460 | PP0620 | Large NT>4.0            | M | 1  | 17313007  | A     | C   | ATP13A2 | missense_variant   | Inherited                            | Compound heterozygous | Not relevant                  |
| EGAN00001366467 | PP0623 | Multisystem             | F | 11 | 125889553 | G     | A   | CDON    | missense_variant   | de novo                              | Heterozygous          | Not relevant                  |
| EGAN000013664   | PP0626 | Multisystem             | M | 20 | 9459569   | C     | G   | PLCB4   | missense_variant   | de novo                              | Heterozygous          | Not relevant                  |

|                 |        |              |   |    |           |    |                     |          |                      |                                      |                       |                               |
|-----------------|--------|--------------|---|----|-----------|----|---------------------|----------|----------------------|--------------------------------------|-----------------------|-------------------------------|
| 73              |        |              |   |    |           |    |                     |          |                      |                                      |                       |                               |
| EGAN00001366491 | PP0635 | Brain        | M | 1  | 8525998   | G  | T                   | RERE     | missense_variant     | Uncertain (dyad)                     | Heterozygous          | Not relevant                  |
| EGAN00001366515 | PP0659 | Multisystem  | M | 11 | 47460282  | C  | G                   | RAPSN    | splice_donor_variant | Inherited                            | Homozygous            | Diagnostic                    |
| EGAN00001366524 | PP0668 | Large NT>4.0 | M | X  | 53652753  | G  | GG<br>GG<br>GC<br>C | HUWE1    | inframe_insertion    | Inherited from unaffected mother (X) | Hemizygous            | Not relevant                  |
| EGAN00001366452 | PP0707 | Large NT>4.0 | M | X  | 152991283 | G  | A                   | ABCD1    | missense_variant     | Inherited from unaffected mother (X) | Hemizygous            | Not relevant                  |
| EGAN00001366458 | PP0710 | Multisystem  | F | 1  | 27094375  | T  | C                   | ARID1A   | missense_variant     | de novo                              | Heterozygous          | Not relevant                  |
| EGAN00001366470 | PP0716 | Cardiac      | M | X  | 39913562  | C  | T                   | BCOR     | missense_variant     | Inherited from unaffected mother (X) | Hemizygous            | Not relevant                  |
| EGAN00001366482 | PP0722 | Large NT>4.0 | F | 12 | 49420214  | G  | A                   | KMT2D    | missense_variant     | de novo                              | Heterozygous          | Potentially clinically useful |
| EGAN00001366552 | PP0792 | Skeletal     | F | 17 | 48264464  | C  | T                   | COL1A1   | missense_variant     | de novo                              | Heterozygous          | Diagnostic                    |
| EGAN00001402388 | PP0969 | Abdominal    | F | 18 | 24128418  | T  | C                   | KCTD1    | missense_variant     | de novo                              | Heterozygous          | Not relevant                  |
| EGAN00001543707 | PP0981 | Multisystem  | F | 1  | 155209416 | AG | A                   | GBA      | frameshift_variant   | Inherited                            | Homozygous            | Diagnostic                    |
| EGAN00001402421 | PP0984 | Multisystem  | M | 9  | 123171414 | TC | AT                  | CDK5RAP2 | missense_variant     | Inherited                            | Homozygous            | Not relevant                  |
| EGAN00001402421 | PP0984 | Multisystem  | M | 6  | 152690195 | A  | G                   | SYNE1    | missense_variant     | Inherited                            | Homozygous            | Not relevant                  |
| EGAN00001402433 | PP1038 | Large NT>4.0 | M | 5  | 13719123  | G  | A                   | DNAH5    | missense_variant     | Inherited                            | Compound heterozygous | Not relevant                  |

|                 |        |              |   |    |           |   |   |         |                  |                                      |                       |                               |
|-----------------|--------|--------------|---|----|-----------|---|---|---------|------------------|--------------------------------------|-----------------------|-------------------------------|
| EGAN00001402433 | PP1038 | Large NT>4.0 | M | 5  | 13727650  | A | G | DNAH5   | missense_variant | Inherited                            | Compound heterozygous | Not relevant                  |
| EGAN00001543736 | PP1206 | Multisystem  | F | 6  | 33139522  | G | T | COL11A2 | missense_variant | Uncertain (dyad)                     | Heterozygous          | Not relevant                  |
| EGAN00001543736 | PP1206 | Multisystem  | F | X  | 153577265 | C | G | FLNA    | missense_variant | Uncertain (dyad)                     | Heterozygous          | Not relevant                  |
| EGAN00001366633 | PP1323 | Cardiac      | M | X  | 74376080  | G | A | ABCB7   | missense_variant | Inherited from unaffected mother (X) | Hemizygous            | Not relevant                  |
| EGAN00001366546 | PP1324 | Skeletal     | M | 12 | 49579680  | G | A | TUBA1A  | missense_variant | de novo                              | Heterozygous          | Potentially clinically useful |
| EGAN00001366555 | PP1327 | Abdominal    | M | 1  | 100349757 | A | G | AGL     | missense_variant | Inherited                            | Homozygous            | Not relevant                  |
| EGAN00001366555 | PP1327 | Abdominal    | M | 10 | 73442306  | G | A | CDH23   | missense_variant | Inherited                            | Compound heterozygous | Not relevant                  |
| EGAN00001366555 | PP1327 | Abdominal    | M | 10 | 73437293  | C | T | CDH23   | missense_variant | Inherited                            | Compound heterozygous | Not relevant                  |
| EGAN00001366564 | PP1336 | Large NT>4.0 | M | 2  | 238277376 | T | C | COL6A3  | missense_variant | Inherited                            | Compound heterozygous | Not relevant                  |
| EGAN00001366564 | PP1336 | Large NT>4.0 | M | 2  | 238283241 | T | C | COL6A3  | missense_variant | Inherited                            | Compound heterozygous | Not relevant                  |
| EGAN00001366564 | PP1336 | Large NT>4.0 | M | 2  | 238296306 | G | C | COL6A3  | missense_variant | Inherited                            | Compound heterozygous | Not relevant                  |
| EGAN00001402078 | PP1339 | Large NT>4.0 | M | 9  | 396881    | A | G | DOCK8   | missense_variant | Inherited                            | Compound heterozygous | Not relevant                  |
| EGAN00001402078 | PP1339 | Large NT>4.0 | M | 9  | 406999    | C | T | DOCK8   | missense_variant | Inherited                            | Compound heterozygous | Not relevant                  |
| EGAN00001366570 | PP1342 | Skeletal     | M | 16 | 70303579  | C | T | AARS    | missense_variant | Inherited                            | Homozygous            | Not relevant                  |
| EGAN000013665   | PP1357 | Skeletal     | M | 5  | 174156248 | G | A | MSX2    | missense_variant | Inherited from                       | Heterozygous          | Not relevant                  |

|                 |        |              |   |    |           |   |         |        |                   |                                      |                       |                               |
|-----------------|--------|--------------|---|----|-----------|---|---------|--------|-------------------|--------------------------------------|-----------------------|-------------------------------|
| 91              |        |              |   |    |           |   |         |        |                   | affected parent                      |                       |                               |
| EGAN00001366594 | PP1360 | Brain        | M | 9  | 98220390  | G | A       | PTCH1  | missense_variant  | Uncertain (dyad)                     | Heterozygous          | Not relevant                  |
| EGAN00001366594 | PP1360 | Brain        | M | 10 | 89720663  | C | T       | PTEN   | missense_variant  | Uncertain (dyad)                     | Heterozygous          | Not relevant                  |
| EGAN00001366603 | PP1369 | Large NT>4.0 | F | 1  | 115258748 | C | T       | NRAS   | missense_variant  | de novo                              | Heterozygous          | Potentially clinically useful |
| EGAN00001366636 | PP1396 | Brain        | M | X  | 21899039  | G | A       | MBTPS2 | missense_variant  | Inherited from unaffected mother (X) | Hemizygous            | Potentially clinically useful |
| EGAN00001410155 | PP1408 | Multisystem  | M | 17 | 70118955  | C | T       | SOX9   | missense_variant  | de novo                              | Heterozygous          | Diagnostic                    |
| EGAN00001428172 | PP1417 | Large NT>4.0 | F | 7  | 56082835  | G | T       | PSPH   | missense_variant  | Inherited                            | Compound heterozygous | Not relevant                  |
| EGAN00001428172 | PP1417 | Large NT>4.0 | F | 7  | 56088791  | C | T       | PSPH   | missense_variant  | Inherited                            | Compound heterozygous | Not relevant                  |
| EGAN00001402427 | PP1420 | Multisystem  | F | 11 | 6648209   | G | A       | DCHS1  | missense_variant  | Inherited                            | Compound heterozygous | Not relevant                  |
| EGAN00001402427 | PP1420 | Multisystem  | F | 11 | 6651689   | G | GCAGCGC | DCHS1  | inframe_insertion | Inherited                            | Compound heterozygous | Not relevant                  |
| EGAN00001402427 | PP1420 | Multisystem  | F | 11 | 6647509   | A | T       | DCHS1  | missense_variant  | Inherited                            | Compound heterozygous | Not relevant                  |
| EGAN00001410173 | PP1462 | Multisystem  | M | 7  | 140501302 | T | C       | BRAF   | missense_variant  | de novo                              | Heterozygous          | Diagnostic                    |
| EGAN00001402430 | PP1471 | Multisystem  | M | X  | 49092100  | G | C       | CCDC22 | missense_variant  | Inherited from unaffected mother (X) | Hemizygous            | Not relevant                  |
| EGAN00001402430 | PP1471 | Multisystem  | M | 19 | 39071058  | G | A       | RYR1   | missense_variant  | Inherited                            | Compound heterozygous | Not relevant                  |

|                 |        |              |   |    |           |    |   |         |                         |           |                       |                               |
|-----------------|--------|--------------|---|----|-----------|----|---|---------|-------------------------|-----------|-----------------------|-------------------------------|
| EGAN00001402430 | PP1471 | Multisystem  | M | 19 | 38991601  | G  | A | RYR1    | missense_variant        | Inherited | Compound heterozygous | Not relevant                  |
| EGAN00001402349 | PP1474 | Chest        | F | 7  | 100404994 | C  | T | EPHB4   | missense_variant        | de novo   | Heterozygous          | Not relevant                  |
| EGAN00001401997 | PP1522 | Multisystem  | F | 8  | 145738796 | G  | A | RECQL4  | stop_gained             | Inherited | Compound heterozygous | Potentially clinically useful |
| EGAN00001401997 | PP1522 | Multisystem  | F | 8  | 145740360 | G  | C | RECQL4  | missense_variant        | Inherited | Compound heterozygous | Potentially clinically useful |
| EGAN00001402000 | PP1525 | Abdominal    | F | 7  | 146818170 | G  | C | CNTNAP2 | missense_variant        | Inherited | Compound heterozygous | Not relevant                  |
| EGAN00001402000 | PP1525 | Abdominal    | F | 7  | 146536994 | T  | G | CNTNAP2 | missense_variant        | Inherited | Compound heterozygous | Not relevant                  |
| EGAN00001402003 | PP1528 | Large NT>4.0 | M | 12 | 112926910 | G  | T | PTPN11  | missense_variant        | de novo   | Heterozygous          | Potentially clinically useful |
| EGAN00001402018 | PP1546 | Large NT>4.0 | F | 19 | 39068824  | G  | A | RYR1    | missense_variant        | Inherited | Compound heterozygous | Not relevant                  |
| EGAN00001402018 | PP1546 | Large NT>4.0 | F | 19 | 38958251  | TC | T | RYR1    | frameshift_variant      | Inherited | Compound heterozygous | Not relevant                  |
| EGAN00001402021 | PP1549 | Cardiac      | M | 21 | 46898244  | G  | A | COL18A1 | missense_variant        | Inherited | Compound heterozygous | Not relevant                  |
| EGAN00001402021 | PP1549 | Cardiac      | M | 21 | 46913431  | C  | T | COL18A1 | missense_variant        | Inherited | Compound heterozygous | Not relevant                  |
| EGAN00001402021 | PP1549 | Cardiac      | M | 3  | 78695341  | C  | G | ROBO1   | splice_acceptor_variant | de novo   | Heterozygous          | Potentially clinically useful |
| EGAN00001402030 | PP1561 | Skeletal     | F | 3  | 178936091 | G  | A | PIK3CA  | missense_variant        | de novo   | Heterozygous          | Diagnostic                    |
| EGAN00001402042 | PP1573 | Hydrops      | F | 12 | 49443834  | GC | G | KMT2D   | frameshift_variant      | de novo   | Heterozygous          | Diagnostic                    |
| EGAN00001402048 | PP1579 | Brain        | M | 6  | 30691699  | C  | T | TUBB    | missense_variant        | de novo   | Heterozygous          | Diagnostic                    |

|                 |        |                         |   |    |           |        |   |         |                    |                                      |                       |                        |
|-----------------|--------|-------------------------|---|----|-----------|--------|---|---------|--------------------|--------------------------------------|-----------------------|------------------------|
| EGAN00001402054 | PP1588 | Skeletal                | F | 12 | 2721073   | A      | G | CACNA1C | missense_variant   | de novo                              | Heterozygous          | Not relevant           |
| EGAN00001402066 | PP1603 | Spinal                  | F | 11 | 68707139  | T      | G | IGHMBP2 | missense_variant   | Inherited                            | Compound heterozygous | Not relevant           |
| EGAN00001402066 | PP1603 | Spinal                  | F | 11 | 68701322  | C      | T | IGHMBP2 | missense_variant   | Inherited                            | Compound heterozygous | Not relevant           |
| EGAN00001402069 | PP1606 | Spinal                  | M | X  | 66766138  | C      | T | AR      | missense_variant   | Inherited from unaffected mother (X) | Hemizygous            | Not relevant           |
| EGAN00001402442 | PP1627 | Multisystem             | F | 16 | 88804403  | A      | G | PIEZO1  | missense_variant   | Inherited                            | Compound heterozygous | Diagnostic             |
| EGAN00001402442 | PP1627 | Multisystem             | F | 16 | 88798751  | C      | G | PIEZO1  | missense_variant   | Inherited                            | Compound heterozygous | Diagnostic             |
| EGAN00001402442 | PP1627 | Multisystem             | F | 16 | 88786487  | C      | T | PIEZO1  | missense_variant   | Inherited                            | Compound heterozygous | Diagnostic             |
| EGAN00001402146 | PP1663 | Multisystem             | M | 6  | 32037996  | G      | A | TNXB    | missense_variant   | Inherited                            | Compound heterozygous | Not relevant           |
| EGAN00001402146 | PP1663 | Multisystem             | M | 6  | 32057125  | C      | T | TNXB    | missense_variant   | Inherited                            | Compound heterozygous | Not relevant           |
| EGAN00001402164 | PP1681 | Multisystem             | M | 13 | 25484005  | AAATT  | A | CENPJ   | frameshift_variant | Inherited                            | Compound heterozygous | Not relevant           |
| EGAN00001402164 | PP1681 | Multisystem             | M | 13 | 25473696  | T      | C | CENPJ   | missense_variant   | Inherited                            | Compound heterozygous | Not relevant           |
| EGAN00001402164 | PP1681 | Multisystem             | M | 13 | 25484011  | GGAGAC | G | CENPJ   | frameshift_variant | Inherited                            | Compound heterozygous | Not relevant           |
| EGAN00001402352 | PP1711 | Facial/cleft lip±palate | F | 1  | 149898588 | GT     | G | SF3B4   | frameshift_variant | de novo                              | Heterozygous          | Diagnostic             |
| EGAN00001402361 | PP1714 | Chest                   | F | 1  | 7724486   | G      | A | CAMTA1  | missense_variant   | de novo                              | Heterozygous          | Not relevant           |
| EGAN000014023   | PP1720 | Brain                   | F | 8  | 61757601  | C      | T | CHD7    | stop_gained        | de novo                              | Heterozygous          | Potentially clinically |

|                 |        |                         |   |    |           |     |    |         |                         |                                      |                       |                               |
|-----------------|--------|-------------------------|---|----|-----------|-----|----|---------|-------------------------|--------------------------------------|-----------------------|-------------------------------|
| 67              |        |                         |   |    |           |     |    |         |                         |                                      |                       | useful                        |
| EGAN00001402370 | PP1723 | Large NT>4.0            | M | 11 | 118373141 | AG  | A  | KMT2A   | frameshift_variant      | de novo                              | Heterozygous          | Potentially clinically useful |
| EGAN00001402373 | PP1726 | Cardiac                 | M | 6  | 149700453 | GTC | G  | TAB2    | frameshift_variant      | de novo                              | Heterozygous          | Diagnostic                    |
| EGAN00001402409 | PP1738 | Multisystem             | F | 16 | 30977381  | G   | A  | SETD1A  | missense_variant        | de novo                              | Heterozygous          | Not relevant                  |
| EGAN00001410041 | PP1750 | Cardiac                 | M | 16 | 89346991  | ATC | A  | ANKRD11 | frameshift_variant      | de novo                              | Heterozygous          | Diagnostic                    |
| EGAN00001410044 | PP1753 | Multisystem             | F | 11 | 2906501   | G   | GC | CDKN1C  | frameshift_variant      | Inherited                            | Heterozygous          | Diagnostic                    |
| EGAN00001410047 | PP1756 | Multisystem             | M | 2  | 215851290 | T   | C  | ABCA12  | missense_variant        | Inherited                            | Homozygous            | Not relevant                  |
| EGAN00001410047 | PP1756 | Multisystem             | M | X  | 153296249 | G   | A  | MECP2   | missense_variant        | Inherited from unaffected mother (X) | Hemizygous            | Not relevant                  |
| EGAN00001410065 | PP1774 | Facial/cleft lip+palate | F | 11 | 121058691 | C   | A  | TECTA   | stop_gained             | Inherited                            | Compound heterozygous | Not relevant                  |
| EGAN00001410065 | PP1774 | Facial                  | F | 11 | 120998747 | C   | G  | TECTA   | missense_variant        | Inherited                            | Compound heterozygous | Not relevant                  |
| EGAN00001410068 | PP1777 | Cardiac                 | M | X  | 70389118  | C   | T  | NLGN3   | missense_variant        | Inherited from unaffected mother (X) | Hemizygous            | Not relevant                  |
| EGAN00001410071 | PP1780 | Multisystem             | M | 11 | 824686    | C   | T  | PNPLA2  | missense_variant        | Inherited                            | Homozygous            | Not relevant                  |
| EGAN00001410071 | PP1780 | Multisystem             | M | 12 | 124184249 | A   | G  | TCTN2   | splice_acceptor_variant | Inherited                            | Homozygous            | Diagnostic                    |
| EGAN00001410077 | PP1786 | Multisystem             | M | 6  | 33146747  | G   | A  | COL11A2 | missense_variant        | Inherited                            | Compound heterozygous | Not relevant                  |
| EGAN000014100   | PP1786 | Multisystem             | M | 6  | 33146086  | G   | A  | COL11A2 | missense_variant        | Inherited                            | Compound heterozygous | Not relevant                  |

|                 |        |              |   |    |           |   |   |         |                  |                                      |                       |              |
|-----------------|--------|--------------|---|----|-----------|---|---|---------|------------------|--------------------------------------|-----------------------|--------------|
| 77              |        |              |   |    |           |   |   |         |                  |                                      |                       |              |
| EGAN00001410086 | PP1795 | Multisystem  | M | 16 | 57493495  | C | T | COQ9    | stop_gained      | Inherited                            | Homozygous            | Diagnostic   |
| EGAN00001410098 | PP1807 | Large NT>4.0 | M | X  | 10442702  | G | A | MID1    | stop_gained      | de novo                              | Hemizygous            | Diagnostic   |
| EGAN00001410101 | PP1810 | Cardiac      | F | 2  | 74146668  | C | T | ACTG2   | missense_variant | de novo                              | Heterozygous          | Not relevant |
| EGAN00001410104 | PP1813 | Multisystem  | F | 17 | 41256947  | C | T | BRCA1   | missense_variant | Inherited                            | Homozygous            | Not relevant |
| EGAN00001410113 | PP1822 | Brain        | M | X  | 109931993 | A | C | CHRD1   | missense_variant | Inherited from unaffected mother (X) | Hemizygous            | Not relevant |
| EGAN00001410119 | PP1828 | Abdominal    | F | 6  | 129635920 | G | A | LAMA2   | missense_variant | Inherited                            | Compound heterozygous | Not relevant |
| EGAN00001410119 | PP1828 | Abdominal    | F | 6  | 129470136 | G | A | LAMA2   | missense_variant | Inherited                            | Compound heterozygous | Not relevant |
| EGAN00001410122 | PP1831 | Brain        | F | 10 | 90707070  | G | A | ACTA2   | missense_variant | Uncertain                            | Heterozygous          | Not relevant |
| EGAN00001410122 | PP1831 | Brain        | F | 12 | 6691785   | A | G | CHD4    | missense_variant | Uncertain                            | Heterozygous          | Not relevant |
| EGAN00001410122 | PP1831 | Brain        | F | 9  | 27157912  | G | T | TEK     | missense_variant | Uncertain                            | Heterozygous          | Not relevant |
| EGAN00001410137 | PP1843 | Multisystem  | M | 6  | 116442326 | C | G | COL10A1 | missense_variant | de novo                              | Heterozygous          | Not relevant |
| EGAN00001410137 | PP1843 | Multisystem  | M | 12 | 49435258  | G | A | KMT2D   | stop_gained      | de novo                              | Heterozygous          | Diagnostic   |
| EGAN00001410146 | PP1852 | Large NT>4.0 | F | 1  | 151377462 | A | G | POGZ    | missense_variant | de novo                              | Heterozygous          | Not relevant |
| EGAN00001410149 | PP1855 | Hydrops      | M | X  | 99663003  | C | T | PCDH19  | missense_variant | Inherited from unaffected            | Hemizygous            | Not relevant |



|                         |            |                 |   |    |               |                            |                                                         |        |                              |                                               |                          |                 |
|-------------------------|------------|-----------------|---|----|---------------|----------------------------|---------------------------------------------------------|--------|------------------------------|-----------------------------------------------|--------------------------|-----------------|
|                         |            |                 |   |    |               |                            |                                                         |        |                              | mother (X)                                    |                          |                 |
| EGAN00<br>0014101<br>61 | PP1<br>864 | Cardiac         | M | 12 | 49447760      | C                          | T                                                       | KMT2D  | splice_donor<br>_variant     | de novo                                       | Heterozygous             | Diagnostic      |
| EGAN00<br>0014283<br>37 | PP1<br>882 | Brain           | M | 9  | 13940024<br>8 | G                          | A                                                       | NOTCH1 | missense_va<br>riant         | de novo                                       | Heterozygous             | Not<br>relevant |
| EGAN00<br>0014280<br>01 | PP1<br>892 | Cardiac         | F | 2  | 39278352      | G                          | GC<br>TT                                                | SOS1   | protein_alteri<br>ng_variant | de novo                                       | Heterozygous             | Diagnostic      |
| EGAN00<br>0014280<br>07 | PP1<br>898 | Brain           | F | 11 | 12474783<br>9 | G                          | T                                                       | ROBO3  | missense_va<br>riant         | Inherited                                     | Compound<br>heterozygous | Not<br>relevant |
| EGAN00<br>0014280<br>07 | PP1<br>898 | Brain           | F | 11 | 12474475<br>2 | C                          | T                                                       | ROBO3  | missense_va<br>riant         | Inherited                                     | Compound<br>heterozygous | Not<br>relevant |
| EGAN00<br>0014280<br>43 | PP1<br>934 | Skeletal        | M | 17 | 48266844      | C                          | A                                                       | COL1A1 | missense_va<br>riant         | de novo                                       | Heterozygous             | Diagnostic      |
| EGAN00<br>0014280<br>43 | PP1<br>934 | Skeletal        | M | 19 | 39002913      | G                          | A                                                       | RYR1   | missense_va<br>riant         | Inherited                                     | Compound<br>heterozygous | Not<br>relevant |
| EGAN00<br>0014280<br>43 | PP1<br>934 | Skeletal        | M | 19 | 39055825      | GC<br>AC<br>GG<br>CG<br>GC | GC<br>AC<br>GG<br>CG<br>GC<br>CA<br>CG<br>GC<br>GG<br>C | RYR1   | inframe_inse<br>rtion        | Inherited                                     | Compound<br>heterozygous | Not<br>relevant |
| EGAN00<br>0014280<br>76 | PP1<br>967 | Multisyste<br>m | M | 16 | 88782438      | C                          | T                                                       | PIEZO1 | missense_va<br>riant         | de novo                                       | Heterozygous             | Not<br>relevant |
| EGAN00<br>0014280<br>76 | PP1<br>967 | Multisyste<br>m | M | 12 | 11288820<br>2 | C                          | T                                                       | PTPN11 | missense_va<br>riant         | de novo                                       | Heterozygous             | Diagnostic      |
| EGAN00<br>0014280<br>79 | PP1<br>970 | Chest           | M | X  | 14968061<br>0 | G                          | T                                                       | MAMLD1 | missense_va<br>riant         | Inherited<br>from<br>unaffected<br>mother (X) | Hemizygous               | Not<br>relevant |
| EGAN00<br>0014280<br>97 | PP1<br>988 | Skeletal        | M | 15 | 89876873      | CC<br>GTC<br>GCT<br>GG     | C                                                       | POLG   | inframe_dele<br>tion         | Inherited                                     | Compound<br>heterozygous | Not<br>relevant |

|                         |            |                 |   |    |               |                                                         |    |         |                        |           |                          |                 |
|-------------------------|------------|-----------------|---|----|---------------|---------------------------------------------------------|----|---------|------------------------|-----------|--------------------------|-----------------|
|                         |            |                 |   |    |               | GG<br>T                                                 |    |         |                        |           |                          |                 |
| EGAN00<br>0014280<br>97 | PP1<br>988 | Skeletal        | M | 15 | 89864238      | T                                                       | G  | POLG    | missense_v<br>ariant   | Inherited | Compound<br>heterozygous | Not<br>relevant |
| EGAN00<br>0014281<br>09 | PP2<br>000 | Multisyste<br>m | M | 19 | 38993358      | C                                                       | A  | RYR1    | stop_gained            | Inherited | Compound<br>heterozygous | Diagnostic      |
| EGAN00<br>0014281<br>09 | PP2<br>000 | Multisyste<br>m | M | 19 | 39010008      | GCT<br>GCT<br>GG<br>TGC<br>GG<br>GA<br>CG<br>AGT<br>TCT | G  | RYR1    | frameshift_v<br>ariant | Inherited | Compound<br>heterozygous | Diagnostic      |
| EGAN00<br>0014281<br>12 | PP2<br>003 | Hydrops         | F | 1  | 17312692      | G                                                       | A  | ATP13A2 | missense_v<br>ariant   | Inherited | Compound<br>heterozygous | Not<br>relevant |
| EGAN00<br>0014281<br>12 | PP2<br>003 | Hydrops         | F | 1  | 17312830      | G                                                       | A  | ATP13A2 | missense_v<br>ariant   | Inherited | Compound<br>heterozygous | Not<br>relevant |
| EGAN00<br>0014281<br>18 | PP2<br>009 | Skeletal        | M | 11 | 11845200<br>6 | G                                                       | GT | ARCN1   | frameshift_v<br>ariant | de novo   | Heterozygous             | Diagnostic      |
| EGAN00<br>0014281<br>24 | PP2<br>015 | Multisyste<br>m | F | 3  | 58120485      | G                                                       | C  | FLNB    | missense_v<br>ariant   | de novo   | Heterozygous             | Diagnostic      |
| EGAN00<br>0014281<br>39 | PP2<br>030 | Cardiac         | M | 16 | 71015315      | C                                                       | T  | HYDIN   | missense_v<br>ariant   | Inherited | Compound<br>heterozygous | Not<br>relevant |
| EGAN00<br>0014281<br>39 | PP2<br>030 | Cardiac         | M | 16 | 70867931      | C                                                       | T  | HYDIN   | missense_v<br>ariant   | Inherited | Compound<br>heterozygous | Not<br>relevant |
| EGAN00<br>0014281<br>39 | PP2<br>030 | Cardiac         | M | 6  | 15265284<br>5 | CCA<br>A                                                | C  | SYNE1   | inframe_dele<br>tion   | Inherited | Compound<br>heterozygous | Not<br>relevant |
| EGAN00<br>0014281<br>39 | PP2<br>030 | Cardiac         | M | 6  | 15259033<br>7 | G                                                       | T  | SYNE1   | missense_v<br>ariant   | Inherited | Compound<br>heterozygous | Not<br>relevant |
| EGAN00<br>0014281<br>42 | PP2<br>033 | Cardiac         | M | 8  | 61654644      | A                                                       | AG | CHD7    | frameshift_v<br>ariant | de novo   | Heterozygous             | Diagnostic      |
| EGAN00<br>0014281       | PP2<br>039 | Hydrops         | M | 5  | 36976444      | C                                                       | T  | NIPBL   | stop_gained            | de novo   | Heterozygous             | Diagnostic      |

|                 |        |              |   |    |           |   |   |        |                         |                                      |                       |                               |
|-----------------|--------|--------------|---|----|-----------|---|---|--------|-------------------------|--------------------------------------|-----------------------|-------------------------------|
| 48              |        |              |   |    |           |   |   |        |                         |                                      |                       |                               |
| EGAN00001428154 | PP2045 | Abdominal    | F | 1  | 235993614 | T | C | LYST   | missense_variant        | Inherited                            | Compound heterozygous | Not relevant                  |
| EGAN00001428154 | PP2045 | Abdominal    | F | 1  | 235827838 | C | T | LYST   | missense_variant        | Inherited                            | Compound heterozygous | Not relevant                  |
| EGAN00001428157 | PP2048 | Hydrops      | M | X  | 153593586 | C | T | FLNA   | missense_variant        | Inherited from unaffected mother (X) | Hemizygous            | Not relevant                  |
| EGAN00001428160 | PP2051 | Renal        | M | X  | 48933402  | C | T | WDR45  | splice_acceptor_variant | Inherited from unaffected mother (X) | Hemizygous            | Not relevant                  |
| EGAN00001471937 | PP2093 | Large NT>4.0 | F | 2  | 220342126 | C | T | SPEG   | missense_variant        | Inherited                            | Compound heterozygous | Not relevant                  |
| EGAN00001471937 | PP2093 | Large NT>4.0 | F | 2  | 220354255 | G | T | SPEG   | missense_variant        | Inherited                            | Compound heterozygous | Not relevant                  |
| EGAN00001543690 | PP2096 | Hydrops      | F | 19 | 8467005   | A | T | RAB11B | missense_variant        | de novo                              | Heterozygous          | Not relevant                  |
| EGAN00001543738 | PP2141 | Skeletal     | M | 4  | 1803564   | C | T | FGFR3  | missense_variant        | de novo                              | Heterozygous          | Diagnostic                    |
| EGAN00001471892 | PP2378 | Multisystem  | F | 2  | 227966249 | G | A | COL4A4 | missense_variant        | Inherited                            | Compound heterozygous | Not relevant                  |
| EGAN00001471892 | PP2378 | Multisystem  | F | 2  | 227927312 | C | T | COL4A4 | missense_variant        | Inherited                            | Compound heterozygous | Not relevant                  |
| EGAN00001471925 | PP2396 | Multisystem  | F | 3  | 71821955  | G | A | PROK2  | missense_variant        | de novo                              | Heterozygous          | Not relevant                  |
| EGAN00001471958 | PP2399 | Multisystem  | F | 5  | 176709563 | A | G | NSD1   | missense_variant        | de novo                              | Heterozygous          | Potentially clinically useful |
| EGAN00001471961 | PP2402 | Multisystem  | M | X  | 149681311 | G | A | MAMLD1 | missense_variant        | Inherited from unaffected mother (X) | Hemizygous            | Not relevant                  |

|                 |        |             |   |    |           |   |   |           |                  |                                      |                       |              |
|-----------------|--------|-------------|---|----|-----------|---|---|-----------|------------------|--------------------------------------|-----------------------|--------------|
| EGAN00001471907 | PP2408 | Brain       | M | 14 | 57114193  | T | C | TMEM260   | missense_variant | Inherited                            | Compound heterozygous | Not relevant |
| EGAN00001471907 | PP2408 | Brain       | M | 14 | 57072337  | A | G | TMEM260   | missense_variant | Inherited                            | Compound heterozygous | Not relevant |
| EGAN00001471910 | PP2489 | Multisystem | F | 5  | 139493771 | C | A | PURA      | missense_variant | de novo                              | Heterozygous          | Not relevant |
| EGAN00001472072 | PP2492 | Multisystem | M | 1  | 19215893  | T | C | ALDH4A1   | missense_variant | Inherited                            | Homozygous            | Not relevant |
| EGAN00001472072 | PP2492 | Multisystem | M | X  | 68060265  | G | A | EFNB1     | missense_variant | Inherited from unaffected mother (X) | Hemizygous            | Not relevant |
| EGAN00001472072 | PP2492 | Multisystem | M | 1  | 22191394  | C | T | HSPG2     | missense_variant | Inherited                            | Homozygous            | Not relevant |
| EGAN00001471940 | PP2501 | Multisystem | M | 16 | 56368732  | G | A | GNAO1     | missense_variant | de novo                              | Heterozygous          | Not relevant |
| EGAN00001471979 | PP2534 | Hydrops     | M | 13 | 110861234 | G | T | COL4A1    | missense_variant | de novo                              | Heterozygous          | Not relevant |
| EGAN00001471922 | PP2543 | Skeletal    | M | 2  | 8918823   | C | G | KIDINS220 | missense_variant | de novo                              | Heterozygous          | Not relevant |
| EGAN00001472057 | PP2564 | Hydrops     | M | 4  | 140299961 | C | G | NAA15     | missense_variant | de novo                              | Heterozygous          | Not relevant |
| EGAN00001472057 | PP2564 | Hydrops     | M | X  | 122758006 | G | A | THOC2     | missense_variant | de novo                              | Hemizygous            | Not relevant |
| EGAN00001472096 | PP2609 | Hydrops     | M | 2  | 216285498 | A | T | FN1       | missense_variant | de novo                              | Heterozygous          | Not relevant |
| EGAN00001472066 | PP2636 | Skeletal    | M | X  | 84520205  | G | A | ZNF711    | missense_variant | Inherited from unaffected mother (X) | Hemizygous            | Not relevant |
| EGAN00001471952 | PP2645 | Multisystem | M | 6  | 10402841  | G | A | TFAP2A    | missense_variant | de novo                              | Heterozygous          | Diagnostic   |

|                 |        |             |   |    |           |   |    |          |                         |                                      |                       |                               |
|-----------------|--------|-------------|---|----|-----------|---|----|----------|-------------------------|--------------------------------------|-----------------------|-------------------------------|
| EGAN00001471867 | PP2690 | Brain       | M | X  | 153296177 | G | A  | MECP2    | missense_variant        | Inherited from unaffected mother (X) | Hemizygous            | Potentially clinically useful |
| EGAN00001471885 | PP2708 | Chest       | M | 17 | 38240883  | C | T  | THRA     | missense_variant        | de novo                              | Heterozygous          | Not relevant                  |
| EGAN00001471991 | PP2718 | Multisystem | M | 8  | 61654979  | C | T  | CHD7     | stop_gained             | de novo                              | Heterozygous          | Diagnostic                    |
| EGAN00001471997 | PP2724 | Skeletal    | M | 19 | 8668617   | A | T  | ADAMTS10 | missense_variant        | Inherited                            | Compound heterozygous | Not relevant                  |
| EGAN00001471997 | PP2724 | Skeletal    | M | 19 | 8656993   | T | TG | ADAMTS10 | frameshift_variant      | Inherited                            | Compound heterozygous | Not relevant                  |
| EGAN00001472015 | PP2742 | Abdominal   | F | X  | 53576285  | G | A  | HUWE1    | missense_variant        | de novo                              | Heterozygous          | Not relevant                  |
| EGAN00001472021 | PP2748 | Skeletal    | M | 16 | 9923339   | C | G  | GRIN2A   | missense_variant        | de novo                              | Heterozygous          | Not relevant                  |
| EGAN00001472024 | PP2751 | Multisystem | M | X  | 13773312  | C | T  | OFD1     | missense_variant        | Inherited from unaffected mother (X) | Hemizygous            | Not relevant                  |
| EGAN00001472126 | PP2784 | Brain       | M | X  | 70614084  | G | A  | TAF1     | missense_variant        | Inherited from unaffected mother (X) | Hemizygous            | Not relevant                  |
| EGAN00001472069 | PP2886 | Cardiac     | M | X  | 153595827 | A | T  | FLNA     | missense_variant        | Inherited from affected parent       | Hemizygous            | Not relevant                  |
| EGAN00001472069 | PP2886 | Cardiac     | M | 3  | 71823660  | T | C  | PROK2    | splice_acceptor_variant | Inherited from affected parent       | Heterozygous          | Potentially clinically useful |
| EGAN00001472102 | PP2895 | Abdominal   | M | 6  | 152651557 | G | A  | SYNE1    | missense_variant        | Inherited                            | Compound heterozygous | Not relevant                  |
| EGAN00001472102 | PP2895 | Abdominal   | M | 6  | 152804264 | C | T  | SYNE1    | missense_variant        | Inherited                            | Compound heterozygous | Not relevant                  |
| EGAN000014764   | PP2904 | Spinal      | M | 7  | 100419941 | T | TG | EPHB4    | frameshift_variant      | de novo                              | Heterozygous          | Diagnostic                    |

|                 |        |                         |   |    |           |    |                     |        |                    |                                      |                       |                               |
|-----------------|--------|-------------------------|---|----|-----------|----|---------------------|--------|--------------------|--------------------------------------|-----------------------|-------------------------------|
| 53              |        |                         |   |    |           |    |                     |        |                    |                                      |                       |                               |
| EGAN00001476498 | PP2949 | Cardiac                 | M | X  | 21887700  | G  | A                   | MBTPS2 | missense_variant   | Inherited from unaffected mother (X) | Hemizygous            | Not relevant                  |
| EGAN00001476501 | PP2952 | Cardiac                 | M | X  | 99917257  | T  | C                   | SRPX2  | missense_variant   | Inherited from unaffected mother (X) | Hemizygous            | Not relevant                  |
| EGAN00001476527 | PP2979 | Multisystem             | M | 8  | 61654746  | CG | C                   | CHD7   | frameshift_variant | de novo                              | Heterozygous          | Diagnostic                    |
| EGAN00001589013 | PP3045 | Multisystem             | M | 2  | 219525942 | A  | G                   | BCS1L  | missense_variant   | Inherited                            | Compound heterozygous | Potentially clinically useful |
| EGAN00001589013 | PP3045 | Multisystem             | M | 2  | 219527701 | A  | G                   | BCS1L  | missense_variant   | Inherited                            | Compound heterozygous | Potentially clinically useful |
| EGAN00001589004 | PP3111 | Renal                   | M | 19 | 46272041  | G  | GC<br>CG<br>CC<br>A | SIX5   | inframe_insertion  | Uncertain (dyad)                     | Heterozygous          | Not relevant                  |
| EGAN00001531002 | PP3144 | Abdominal               | M | X  | 76872090  | G  | A                   | ATRX   | missense_variant   | Inherited from unaffected mother (X) | Hemizygous            | Potentially clinically useful |
| EGAN00001589022 | PP3168 | Multisystem             | F | 1  | 155874266 | A  | G                   | RIT1   | missense_variant   | de novo                              | Heterozygous          | Diagnostic                    |
| EGAN00001543676 | PP3189 | Facial/cleft lip±palate | M | 6  | 30691720  | T  | C                   | TUBB   | missense_variant   | de novo                              | Heterozygous          | Not relevant                  |
| EGAN00001588989 | PP3204 | Cardiac                 | F | 18 | 6977821   | G  | A                   | LAMA1  | missense_variant   | Inherited                            | Compound heterozygous | Not relevant                  |
| EGAN00001588989 | PP3204 | Cardiac                 | F | 18 | 6971976   | G  | T                   | LAMA1  | missense_variant   | Inherited                            | Compound heterozygous | Not relevant                  |
| EGAN00001588980 | PP3213 | Brain                   | M | 6  | 152774686 | AG | A                   | SYNE1  | frameshift_variant | Inherited                            | Compound heterozygous | Not relevant                  |
| EGAN00001588980 | PP3213 | Brain                   | M | 6  | 152697692 | G  | C                   | SYNE1  | missense_variant   | Inherited                            | Compound heterozygous | Not relevant                  |

|                 |        |             |   |    |           |   |       |         |                   |                                      |                       |                               |
|-----------------|--------|-------------|---|----|-----------|---|-------|---------|-------------------|--------------------------------------|-----------------------|-------------------------------|
| EGAN00001588980 | PP3213 | Brain       | M | 6  | 152631565 | C | G     | SYNE1   | missense_variant  | Inherited                            | Compound heterozygous | Not relevant                  |
| EGAN00001543685 | PP3246 | Skeletal    | M | 3  | 111298085 | A | G     | CD96    | missense_variant  | Uncertain (dyad)                     | Heterozygous          | Not relevant                  |
| EGAN00001543685 | PP3246 | Skeletal    | M | 13 | 101844299 | T | C     | NALCN   | missense_variant  | de novo (presumed dyad)              | Heterozygous          | Diagnostic                    |
| EGAN00001543729 | PP3255 | Multisystem | M | 9  | 139404264 | C | T     | NOTCH1  | missense_variant  | Uncertain (dyad)                     | Heterozygous          | Not relevant                  |
| EGAN00001543731 | PP3258 | Multisystem | F | 11 | 64410183  | T | TGGGC | NRXN2   | inframe_insertion | Uncertain (dyad)                     | Heterozygous          | Not relevant                  |
| EGAN00001598943 | PP3276 | Brain       | F | 1  | 43912636  | T | C     | SZT2    | missense_variant  | Inherited                            | Homozygous            | Not relevant                  |
| EGAN00001598937 | PP3285 | Cardiac     | F | 7  | 5568962   | G | C     | ACTB    | missense_variant  | de novo                              | Heterozygous          | Potentially clinically useful |
| EGAN00001530999 | PP3297 | Cardiac     | M | X  | 39934079  | C | T     | BCOR    | missense_variant  | Inherited from unaffected mother (X) | Hemizygous            | Not relevant                  |
| EGAN00001530999 | PP3297 | Cardiac     | M | X  | 30326874  | C | T     | NR0B1   | missense_variant  | Inherited from unaffected mother (X) | Hemizygous            | Not relevant                  |
| EGAN00001531035 | PP3318 | Chest       | M | 11 | 65978677  | C | T     | PACS1   | missense_variant  | de novo                              | Heterozygous          | Potentially clinically useful |
| EGAN00001531050 | PP3333 | Skeletal    | F | 5  | 13737379  | G | A     | DNAH5   | missense_variant  | Inherited                            | Compound heterozygous | Not relevant                  |
| EGAN00001531050 | PP3333 | Skeletal    | F | 5  | 13794057  | C | A     | DNAH5   | missense_variant  | Inherited                            | Compound heterozygous | Not relevant                  |
| EGAN00001588983 | PP3384 | Multisystem | M | X  | 20206645  | G | T     | RPS6KA3 | missense_variant  | Inherited from unaffected mother (X) | Hemizygous            | Not relevant                  |
| EGAN00001588974 | PP3387 | Multisystem | M | 6  | 57059615  | A | T     | RAB23   | stop_gained       | Inherited                            | Homozygous            | Diagnostic                    |

|                 |        |              |   |    |           |                                          |   |        |                  |                                      |                       |                               |
|-----------------|--------|--------------|---|----|-----------|------------------------------------------|---|--------|------------------|--------------------------------------|-----------------------|-------------------------------|
| EGAN00001598979 | PP3411 | Skeletal     | F | 17 | 48266554  | C                                        | A | COL1A1 | missense_variant | de novo                              | Heterozygous          | Not relevant                  |
| EGAN00001588977 | PP3474 | Brain        | F | 20 | 62045481  | C                                        | T | KCNQ2  | missense_variant | de novo                              | Heterozygous          | Potentially clinically useful |
| EGAN00001588965 | PP3537 | Brain        | M | X  | 153135308 | C                                        | A | L1CAM  | missense_variant | Inherited from unaffected mother (X) | Hemizygous            | Not relevant                  |
| EGAN00001588959 | PP3540 | Skeletal     | F | 4  | 1806119   | G                                        | A | FGFR3  | missense_variant | de novo                              | Heterozygous          | Diagnostic                    |
| EGAN00001588962 | PP3573 | Multisystem  | M | X  | 70510553  | TCA<br>CCA<br>CCA<br>GC<br>AG<br>CA<br>G | T | NONO   | inframe_deletion | Inherited from unaffected mother (X) | Hemizygous            | Not relevant                  |
| EGAN00001598922 | PP3597 | Multisystem  | F | 1  | 22215194  | G                                        | A | HSPG2  | missense_variant | Inherited                            | Compound heterozygous | Not relevant                  |
| EGAN00001598922 | PP3597 | Multisystem  | F | 1  | 22188289  | G                                        | A | HSPG2  | missense_variant | Inherited                            | Compound heterozygous | Not relevant                  |
| EGAN00001598931 | PP3603 | Skeletal     | F | X  | 53586423  | G                                        | A | HUWE1  | missense_variant | de novo                              | Heterozygous          | Not relevant                  |
| EGAN00001598931 | PP3603 | Skeletal     | F | 4  | 88996658  | C                                        | T | PKD2   | missense_variant | de novo                              | Heterozygous          | Not relevant                  |
| EGAN00001366473 | PP0626 | Multisystem  | M | 1  | 155874247 | C                                        | G | RIT1   | missense_variant | Inherited                            | Heterozygous          | Diagnostic                    |
| EGAN00001472087 | PP2567 | Hydrops      | M | 12 | 112915523 | A                                        | G | PTPN11 | missense_variant | Inherited                            | Heterozygous          | Diagnostic                    |
| EGAN00001367088 | PP0503 | Large NT>4.0 | F | 12 | 112915523 | A                                        | G | PTPN11 | missense_variant | Inherited                            | Heterozygous          | Diagnostic                    |



**Supplementary Table 5 – Copy number variants (CNVs) and uniparental disomies (UPDs) reviewed by Clinical Review Panel (hg19 coordinates)**

| EGA_ID         | PP_ID  | Phenotypic Class | Fetal sex | Chr | Start    | End      | Alt               | Gene                                                                                                                                        | Inheritance                          | Zygosity     | Review Outcome    |
|----------------|--------|------------------|-----------|-----|----------|----------|-------------------|---------------------------------------------------------------------------------------------------------------------------------------------|--------------------------------------|--------------|-------------------|
| EGAN0001367161 | PP0576 | Skeletal         | F         | 16  | 17564127 | 18604098 | 1.0Mb deletion    | XYLT1                                                                                                                                       | de novo                              | Heterozygous | Not relevant      |
| EGAN0001471916 | PP2444 | Facial           | M         | X   | 6968281  | 8095281  | 1.1Mb duplication | STS                                                                                                                                         | Inherited from unaffected mother (X) | Hemizygous   | Not relevant      |
| EGAN0001366819 | PP0270 | Large NT>4.0     | M         | 17  | 34842342 | 36234001 | 1.4Mb deletion    | YWHAEP7 ZNHIT3 AATF MYO19 DUSP14 RNA5SP439 DHRS11 HNF1B MIR2909 TADA2A SYNRG MRM1 GGNBP2 PIGW C17orf78 DDX52 HMGB1P24 ACACA LHX1            | de novo                              | Heterozygous | Unknown relevance |
| EGAN0001366413 | PP0087 | Skeletal         | F         | 12  | 1192189  | 2695179  | 1.5Mb deletion    | ERC1 CACNA1C-IT1 CACNA1C-IT3 RPS4XP14 CACNA1C-AS4 LINC00942 CACNA1C LRTM2 LINC00940 ADIPOR2 MIR3649 WNT5B CACNA1C-IT2 FBXL14 CACNA2D4 DCP1B | de novo                              | Heterozygous | Not relevant      |
| EGAN0001543670 | PP3033 | Facial           | M         | 22  | 41564321 | 41575064 | 10.7kb deletion   | EP300                                                                                                                                       | de novo                              | Heterozygous | Not relevant      |

|                         |        |             |   |    |           |           |                        |                                                                                                                                                                                                                                                                                                                                                                                                                                                                                                                                                                                                                              |           |                                        |                                     |
|-------------------------|--------|-------------|---|----|-----------|-----------|------------------------|------------------------------------------------------------------------------------------------------------------------------------------------------------------------------------------------------------------------------------------------------------------------------------------------------------------------------------------------------------------------------------------------------------------------------------------------------------------------------------------------------------------------------------------------------------------------------------------------------------------------------|-----------|----------------------------------------|-------------------------------------|
| EGANO<br>000136<br>6864 | PP0315 | Multisystem | F | 1  | 103352183 | 103484596 | 132.4kb<br>duplication | COL11A1                                                                                                                                                                                                                                                                                                                                                                                                                                                                                                                                                                                                                      | Inherited | Compound<br>heterozygous<br>(with SNV) | Not relevant                        |
| EGANO<br>000142<br>8160 | PP2051 | Renal       | M | 16 | 86429966  | 86613477  | 183kb deletion         | FOXF1 FOXC2                                                                                                                                                                                                                                                                                                                                                                                                                                                                                                                                                                                                                  | de novo   | Heterozygous                           | Potentially<br>clinically<br>useful |
| EGANO<br>000136<br>6740 | PP0225 | Multisystem | M | 22 | 18893860  | 21414945  | 2.5Mb<br>duplication   | DGCR9 FAM230A P<br>PP1R26P3 RNU6-<br>225P DGCR2 SMPD<br>4P1 POM121L4P AB<br>HD17AP4 SLC9A3P<br>2 GSC2 DGCR6L T<br>SSK2 DGCR10 THA<br>P7 GP1BB LZTR1 D<br>GCR11 PI4KAP1 TR<br>MT2A SLC25A1 AIF<br>M3 TMEM191A PI4K<br>A RANBP1 MIR649 <br>TSSK1A MIR4761 C<br>DC45 . RNY1P9 CR<br>KL ARVCF MIR185 <br>TANGO2 TBX1 DGC<br>R5 SEPT5 HIRA C2<br>2orf39 GGTLC3 GN<br>B1L RN7SKP131 R<br>N7SL168P RTN4R K<br>RT18P62 USP41 TU<br>BA3GP UFD1L COM<br>T CA15P2 CA15P1 <br>RN7SL812P C22orf2<br>9 MIR3618 DGCR6 <br>DGCR14 PPP1R26P<br>2 P2RX6P MIR1286 <br>KLHL22 MRPL40 S<br>NAP29 MED15 LINC<br>00896 BCRP5 ZDH<br>HC8 SLC7A4 PROD | de novo   | Heterozygous                           | Unknown<br>relevance                |

|                |        |              |   |    |           |               |                     |                                                                                                  |                                      |                                  |                               |
|----------------|--------|--------------|---|----|-----------|---------------|---------------------|--------------------------------------------------------------------------------------------------|--------------------------------------|----------------------------------|-------------------------------|
|                |        |              |   |    |           |               |                     | H THAP7-AS1 DGCR8 CLTCL1 ZNF74 MIR1306 KRT18P5 SCARF2 TXNRD2 TUBA3FP RIMBP3 CLDN5 SERPIND1 P2RX6 |                                      |                                  |                               |
| EGAN0001543696 | PP3042 | Multisystem  | M | X  | 30671604  | 30877908      | 206.3kb duplication | GK                                                                                               | Inherited from unaffected mother (X) | Hemizygous                       | Not relevant                  |
| EGAN0001366463 | PP0713 | Multisystem  | F | 9  | 1.38E+08  | To be removed | 25.2kb duplication  | COL5A1                                                                                           | de novo                              | Heterozygous                     | Not relevant                  |
| EGAN0001367084 | PP0500 | Multisystem  | M | 22 | 17060170  | 20722040      | 3.7Mb deletion      | TBX1 TUBA8 PEX26                                                                                 | de novo                              | Heterozygous                     | Unknown relevance             |
| EGAN0001366772 | PP0206 | Large NT>4.0 | M | X  | 135115409 | 135115784     | 375bp deletion      | SLC9A6                                                                                           | de novo                              | Hemizygous                       | Potentially clinically useful |
| EGAN0001366512 | PP0656 | Multisystem  | M | 16 | 2120332   | 2161578       | 41.2kb deletion     | PKD1                                                                                             | de novo                              | Heterozygous                     | Diagnostic                    |
| EGAN0001472126 | PP2784 | Brain        | M | X  | 38505397  | 38547108      | 41.7kb duplication  | TSPAN7                                                                                           | Inherited from unaffected mother (X) | Hemizygous                       | Not relevant                  |
| EGAN0001366808 | PP0261 | Large NT>4.0 | M | 1  | 154247351 | 154310314     | 63.2kb duplication  | RNU6-121P RNU6-239P UBAP2L RNU7-57P ATP8B2 AQP10 HAX1                                            | Inherited                            | Compound heterozygous (with SNV) | Not relevant                  |

|                         |        |              |   |    |           |           |                        |            |                                            |              |              |
|-------------------------|--------|--------------|---|----|-----------|-----------|------------------------|------------|--------------------------------------------|--------------|--------------|
| EGANO<br>000136<br>7125 | PP0540 | Multisystem  | F | 9  | 139964223 | 140695623 | 731.4kb<br>duplication | TPRN EHMT1 | Inherited                                  | Heterozygous | Not relevant |
| EGANO<br>000147<br>1901 | PP2387 | Abdominal    | M | 2  | 60687454  | 61484556  | 797.1kb<br>duplication | BCL11A     | de novo                                    | Heterozygous | Not relevant |
| EGANO<br>000136<br>6751 | PP0231 | Cardiac      | M | X  | 76854794  | 76940204  | 85.4kb<br>duplication  | ATRX       | Inherited from<br>unaffected<br>mother (X) | Hemizygous   | Not relevant |
| EGANO<br>000142<br>8160 | PP2051 | Renal        | M | 9  | 137732924 | 137742724 | 9.8kb<br>duplication   | COL5A1     | Uncertain                                  | Heterozygous | Not relevant |
| EGANO<br>000136<br>6422 | PP0602 | Large NT>4.0 | M | 15 | UPD       | NA        | NA                     | UPD_chr15  | Uniparental<br>disomy                      | NA           | Diagnostic   |
| EGANO<br>000136<br>6714 | PP0165 | Skeletal     | M | 10 | UPD       | NA        | NA                     | UPD_chr10  | Uniparental<br>disomy                      | NA           | Not relevant |

Note: All cases considered for inclusion in PAGE had QF-PCR carried to detect common aneuploidies (13,18,21, X and Y) and CMA carried out if QF-PCR was negative, concurrent with recruitment to PAGE. When a CNV was found which was classified as pathogenic and to likely to be the cause of FSA, WES was not initiated. However if clinical CMA failed or a CNV was detected but not considered unequivocally causative of the FSA then WES was performed.

**Supplementary Table 6: Fetal outcomes and phenotypic classes; (NND = neonatal death)**

| EGAID           | PPID   | Pheno     | Sex | Outcome     |
|-----------------|--------|-----------|-----|-------------|
| EGAN00001367173 | PP0588 | Abdominal | F   | Live birth  |
| EGAN00001366780 | PP0210 | Abdominal | F   | Miscarriage |
| EGAN00001367079 | PP0497 | Abdominal | M   | Termination |
| EGAN00001402027 | PP1558 | Abdominal | F   | Termination |
| EGAN00001472102 | PP2895 | Abdominal | M   | Termination |
| EGAN00001366699 | PP0150 | Abdominal | M   | Unknown     |
| EGAN00001366770 | PP0240 | Abdominal | M   | Unknown     |
| EGAN00001366781 | PP0246 | Abdominal | F   | Unknown     |
| EGAN00001366802 | PP0258 | Abdominal | F   | Unknown     |
| EGAN00001367039 | PP0387 | Abdominal | M   | Unknown     |
| EGAN00001366955 | PP0437 | Abdominal | M   | Unknown     |
| EGAN00001366989 | PP0452 | Abdominal | F   | Unknown     |
| EGAN00001367073 | PP0494 | Abdominal | F   | Unknown     |
| EGAN00001366530 | PP0674 | Abdominal | F   | Unknown     |
| EGAN00001402388 | PP0969 | Abdominal | F   | Unknown     |
| EGAN00001402400 | PP0996 | Abdominal | M   | Unknown     |
| EGAN00001402403 | PP0999 | Abdominal | F   | Unknown     |
| EGAN00001366555 | PP1327 | Abdominal | M   | Unknown     |
| EGAN00001366561 | PP1333 | Abdominal | F   | Unknown     |
| EGAN00001402000 | PP1525 | Abdominal | F   | Unknown     |
| EGAN00001402006 | PP1531 | Abdominal | F   | Unknown     |
| EGAN00001402101 | PP1618 | Abdominal | F   | Unknown     |
| EGAN00001402107 | PP1624 | Abdominal | M   | Unknown     |
| EGAN00001402158 | PP1675 | Abdominal | M   | Unknown     |
| EGAN00001402167 | PP1684 | Abdominal | M   | Unknown     |
| EGAN00001402176 | PP1693 | Abdominal | M   | Unknown     |
| EGAN00001410119 | PP1828 | Abdominal | F   | Unknown     |
| EGAN00001428040 | PP1931 | Abdominal | M   | Unknown     |
| EGAN00001428055 | PP1946 | Abdominal | F   | Unknown     |
| EGAN00001428154 | PP2045 | Abdominal | F   | Unknown     |
| EGAN00001471901 | PP2387 | Abdominal | M   | Unknown     |
| EGAN00001471928 | PP2453 | Abdominal | F   | Unknown     |
| EGAN00001471964 | PP2519 | Abdominal | M   | Unknown     |
| EGAN00001472075 | PP2594 | Abdominal | F   | Unknown     |
| EGAN00001471955 | PP2648 | Abdominal | F   | Unknown     |
| EGAN00001472120 | PP2669 | Abdominal | F   | Unknown     |
| EGAN00001472015 | PP2742 | Abdominal | F   | Unknown     |
| EGAN00001472030 | PP2757 | Abdominal | F   | Unknown     |
| EGAN00001543682 | PP2841 | Abdominal | M   | Unknown     |
| EGAN00001476465 | PP2916 | Abdominal | F   | Unknown     |
| EGAN00001476474 | PP2925 | Abdominal | M   | Unknown     |
| EGAN00001543699 | PP3030 | Abdominal | F   | Unknown     |
| EGAN00001543712 | PP3105 | Abdominal | M   | Unknown     |
| EGAN00001531002 | PP3144 | Abdominal | M   | Unknown     |
| EGAN00001530985 | PP3291 | Abdominal | M   | Unknown     |
| EGAN00001366730 | PP0181 | Brain     | M   | Termination |
| EGAN00001366736 | PP0187 | Brain     | M   | Termination |
| EGAN00001366785 | PP0249 | Brain     | F   | Termination |
| EGAN00001367015 | PP0375 | Brain     | F   | Termination |

|                 |        |       |   |             |
|-----------------|--------|-------|---|-------------|
| EGAN00001367021 | PP0378 | Brain | F | Termination |
| EGAN00001367033 | PP0384 | Brain | F | Termination |
| EGAN00001367007 | PP0461 | Brain | M | Termination |
| EGAN00001367044 | PP0479 | Brain | F | Termination |
| EGAN00001367134 | PP0549 | Brain | F | Termination |
| EGAN00001367146 | PP0561 | Brain | M | Termination |
| EGAN00001366448 | PP0614 | Brain | M | Termination |
| EGAN00001366497 | PP0641 | Brain | F | Termination |
| EGAN00001366542 | PP0686 | Brain | M | Termination |
| EGAN00001366429 | PP0695 | Brain | M | Termination |
| EGAN00001366476 | PP0719 | Brain | F | Termination |
| EGAN00001366549 | PP0801 | Brain | F | Termination |
| EGAN00001402355 | PP0849 | Brain | M | Termination |
| EGAN00001402397 | PP0978 | Brain | M | Termination |
| EGAN00001366618 | PP1384 | Brain | M | Termination |
| EGAN00001366621 | PP1387 | Brain | M | Termination |
| EGAN00001366636 | PP1396 | Brain | M | Termination |
| EGAN00001402048 | PP1579 | Brain | M | Termination |
| EGAN00001402098 | PP1615 | Brain | F | Termination |
| EGAN00001402367 | PP1720 | Brain | F | Termination |
| EGAN00001402382 | PP1735 | Brain | M | Termination |
| EGAN00001410050 | PP1759 | Brain | M | Termination |
| EGAN00001428337 | PP1882 | Brain | F | Termination |
| EGAN00001410107 | PP1816 | Brain | M | Termination |
| EGAN00001410170 | PP1873 | Brain | M | Termination |
| EGAN00001428007 | PP1898 | Brain | F | Termination |
| EGAN00001428025 | PP1916 | Brain | M | Termination |
| EGAN00001428046 | PP1937 | Brain | F | Termination |
| EGAN00001428049 | PP1940 | Brain | M | Termination |
| EGAN00001428073 | PP1964 | Brain | M | Termination |
| EGAN00001428130 | PP2021 | Brain | F | Termination |
| EGAN00001471907 | PP2408 | Brain | M | Termination |
| EGAN00001472090 | PP2465 | Brain | F | Termination |
| EGAN00001471967 | PP2522 | Brain | F | Termination |
| EGAN00001471970 | PP2525 | Brain | M | Termination |
| EGAN00001471867 | PP2690 | Brain | M | Termination |
| EGAN00001472000 | PP2727 | Brain | F | Termination |
| EGAN00001472012 | PP2739 | Brain | F | Termination |
| EGAN00001472126 | PP2784 | Brain | M | Termination |
| EGAN00001472081 | PP2838 | Brain | F | Termination |
| EGAN00001472084 | PP2889 | Brain | F | Termination |
| EGAN00001472108 | PP2901 | Brain | M | Termination |
| EGAN00001476456 | PP2907 | Brain | M | Termination |
| EGAN00001476459 | PP2910 | Brain | M | Termination |
| EGAN00001476480 | PP2931 | Brain | F | Termination |
| EGAN00001476492 | PP2943 | Brain | M | Termination |
| EGAN00001543667 | PP3024 | Brain | M | Termination |
| EGAN00001366491 | PP0635 | Brain | M | Unknown     |
| EGAN00001366594 | PP1360 | Brain | M | Unknown     |
| EGAN00001410122 | PP1831 | Brain | F | Unknown     |

|                 |        |         |   |             |
|-----------------|--------|---------|---|-------------|
| EGAN00001476773 | PP2976 | brain   | M | Unknown     |
| EGAN00001588980 | PP3213 | Brain   | M | Unknown     |
| EGAN00001589010 | PP3216 | Brain   | M | Unknown     |
| EGAN00001598961 | PP3267 | Brain   | M | Unknown     |
| EGAN00001598943 | PP3276 | Brain   | F | Unknown     |
| EGAN00001598940 | PP3288 | Brain   | F | Unknown     |
| EGAN00001530984 | PP3294 | Brain   | F | Unknown     |
| EGAN00001531053 | PP3336 | Brain   | F | Unknown     |
| EGAN00001588977 | PP3474 | Brain   | F | Unknown     |
| EGAN00001588956 | PP3504 | Brain   | F | Unknown     |
| EGAN00001588965 | PP3537 | Brain   | M | Unknown     |
| EGAN00001589001 | PP3561 | Brain   | F | Unknown     |
| EGAN00001598919 | PP3582 | Brain   | M | Unknown     |
| EGAN00001598955 | PP3618 | Brain   | F | Unknown     |
| EGAN00001410113 | PP1822 | Brain   | M | Unknown     |
| EGAN00001366643 | PP0093 | Cardiac | M | Termination |
| EGAN00001366658 | PP0108 | Cardiac | F | Termination |
| EGAN00001366682 | PP0132 | Cardiac | M | Termination |
| EGAN00001366687 | PP0138 | Cardiac | F | Termination |
| EGAN00001366717 | PP0168 | Cardiac | M | Termination |
| EGAN00001366726 | PP0177 | Cardiac | M | Termination |
| EGAN00001366733 | PP0184 | Cardiac | F | Termination |
| EGAN00001366751 | PP0231 | Cardiac | M | Termination |
| EGAN00001366852 | PP0303 | Cardiac | M | Termination |
| EGAN00001366892 | PP0330 | Cardiac | M | Termination |
| EGAN00001366946 | PP0339 | Cardiac | F | Termination |
| EGAN00001366959 | PP0345 | Cardiac | M | Termination |
| EGAN00001367043 | PP0390 | Cardiac | M | Termination |
| EGAN00001366931 | PP0425 | Cardiac | F | Termination |
| EGAN00001366484 | PP0434 | Cardiac | M | Termination |
| EGAN00001367068 | PP0491 | Cardiac | M | Termination |
| EGAN00001367098 | PP0513 | Cardiac | F | Termination |
| EGAN00001367101 | PP0516 | Cardiac | M | Termination |
| EGAN00001367113 | PP0528 | Cardiac | M | Termination |
| EGAN00001367143 | PP0558 | Cardiac | M | Termination |
| EGAN00001367176 | PP0591 | Cardiac | F | Termination |
| EGAN00001366445 | PP0704 | Cardiac | F | Termination |
| EGAN00001366470 | PP0716 | Cardiac | M | Termination |
| EGAN00001366582 | PP0729 | Cardiac | M | Termination |
| EGAN00001366630 | PP1320 | Cardiac | M | Termination |
| EGAN00001366633 | PP1323 | Cardiac | M | Termination |
| EGAN00001366558 | PP1330 | Cardiac | F | Termination |
| EGAN00001366600 | PP1366 | Cardiac | M | Termination |
| EGAN00001402021 | PP1549 | Cardiac | M | Termination |
| EGAN00001402033 | PP1564 | Cardiac | M | Termination |
| EGAN00001402039 | PP1570 | Cardiac | M | Termination |
| EGAN00001402113 | PP1630 | Cardiac | F | Termination |
| EGAN00001402149 | PP1666 | Cardiac | M | Termination |
| EGAN00001402182 | PP1699 | Cardiac | M | Termination |
| EGAN00001402364 | PP1717 | Cardiac | F | Termination |

|                 |        |         |   |             |
|-----------------|--------|---------|---|-------------|
| EGAN00001402379 | PP1732 | Cardiac | M | Termination |
| EGAN00001402412 | PP1741 | Cardiac | F | Termination |
| EGAN00001410041 | PP1750 | Cardiac | M | Termination |
| EGAN00001410068 | PP1777 | Cardiac | M | Termination |
| EGAN00001410089 | PP1798 | Cardiac | M | Termination |
| EGAN00001410101 | PP1810 | Cardiac | F | Termination |
| EGAN00001410161 | PP1864 | Cardiac | M | Termination |
| EGAN00001410164 | PP1867 | Cardiac | M | Termination |
| EGAN00001428001 | PP1892 | Cardiac | F | Termination |
| EGAN00001428082 | PP1973 | Cardiac | M | Termination |
| EGAN00001428121 | PP2012 | Cardiac | M | Termination |
| EGAN00001428139 | PP2030 | Cardiac | M | Termination |
| EGAN00001428142 | PP2033 | Cardiac | M | Termination |
| EGAN00001471976 | PP2531 | Cardiac | M | Termination |
| EGAN00001472123 | PP2672 | Cardiac | M | Termination |
| EGAN00001471876 | PP2699 | Cardiac | M | Termination |
| EGAN00001471879 | PP2702 | Cardiac | M | Termination |
| EGAN00001471990 | PP2717 | Cardiac | F | Termination |
| EGAN00001472003 | PP2730 | Cardiac | M | Termination |
| EGAN00001472006 | PP2733 | Cardiac | M | Termination |
| EGAN00001472036 | PP2763 | Cardiac | M | Termination |
| EGAN00001472045 | PP2769 | Cardiac | F | Termination |
| EGAN00001472069 | PP2886 | Cardiac | M | Termination |
| EGAN00001476486 | PP2937 | Cardiac | M | Termination |
| EGAN00001476498 | PP2949 | Cardiac | M | Termination |
| EGAN00001476501 | PP2952 | Cardiac | M | Termination |
| EGAN00001476507 | PP2958 | Cardiac | M | Termination |
| EGAN00001476519 | PP2970 | Cardiac | F | Termination |
| EGAN00001476536 | PP2988 | Cardiac | F | Termination |
| EGAN00001543693 | PP3027 | Cardiac | M | Termination |
| EGAN00001543715 | PP3072 | Cardiac | F | Termination |
| EGAN00001543718 | PP3096 | Cardiac | F | Termination |
| EGAN00001543673 | PP3114 | Cardiac | F | Termination |
| EGAN00001530994 | PP3138 | Cardiac | F | Termination |
| EGAN00001589030 | PP3141 | Cardiac | F | Termination |
| EGAN00001543723 | PP3159 | Cardiac | M | Termination |
| EGAN00001588995 | PP3171 | Cardiac | M | Termination |
| EGAN00001543679 | PP3192 | Cardiac | F | Termination |
| EGAN00001588989 | PP3204 | Cardiac | F | Termination |
| EGAN00001588992 | PP3222 | Cardiac | F | Termination |
| EGAN00001598937 | PP3285 | Cardiac | F | Termination |
| EGAN00001530999 | PP3297 | Cardiac | M | Termination |
| EGAN00001588986 | PP3393 | Cardiac | M | Termination |
| EGAN00001598949 | PP3612 | Cardiac | M | Termination |
| EGAN00001366934 | PP0333 | Cardiac | M | Unknown     |
| EGAN00001402373 | PP1726 | Cardiac | M | Live birth  |
| EGAN00001366746 | PP0228 | Chest   | M | Stillbirth  |
| EGAN00001366828 | PP0279 | Chest   | M | Stillbirth  |
| EGAN00001366996 | PP0366 | Chest   | M | Stillbirth  |
| EGAN00001366872 | PP0413 | Chest   | F | Stillbirth  |



|                 |        |        |   |             |
|-----------------|--------|--------|---|-------------|
| EGAN00001367036 | PP0476 | Chest  | F | Stillbirth  |
| EGAN00001402358 | PP1441 | Chest  | M | Stillbirth  |
| EGAN00001402349 | PP1474 | Chest  | F | Stillbirth  |
| EGAN00001402060 | PP1597 | Chest  | F | Stillbirth  |
| EGAN00001402361 | PP1714 | Chest  | F | Stillbirth  |
| EGAN00001410110 | PP1819 | Chest  | F | Stillbirth  |
| EGAN00001428079 | PP1970 | Chest  | M | Stillbirth  |
| EGAN00001428100 | PP1991 | Chest  | M | Stillbirth  |
| EGAN00001428106 | PP1997 | Chest  | M | Stillbirth  |
| EGAN00001428133 | PP2024 | Chest  | M | Stillbirth  |
| EGAN00001471913 | PP2441 | Chest  | F | Stillbirth  |
| EGAN00001471934 | PP2459 | Chest  | M | Termination |
| EGAN00001471885 | PP2708 | Chest  | M | Termination |
| EGAN00001471994 | PP2721 | Chest  | M | Termination |
| EGAN00001588998 | PP2844 | Chest  | M | Termination |
| EGAN00001531014 | PP3075 | Chest  | M | Termination |
| EGAN00001530981 | PP3147 | Chest  | M | Termination |
| EGAN00001531008 | PP3150 | Chest  | F | Termination |
| EGAN00001531035 | PP3318 | Chest  | M | Termination |
| EGAN00001366655 | PP0105 | Facial | M | Miscarriage |
| EGAN00001366661 | PP0111 | Facial | M | Miscarriage |
| EGAN00001366732 | PP0183 | Facial | M | Miscarriage |
| EGAN00001366837 | PP0288 | Facial | M | Miscarriage |
| EGAN00001366843 | PP0294 | Facial | M | Miscarriage |
| EGAN00001366849 | PP0300 | Facial | M | Miscarriage |
| EGAN00001366940 | PP0336 | Facial | F | Miscarriage |
| EGAN00001366488 | PP0464 | Facial | M | Miscarriage |
| EGAN00001367018 | PP0467 | Facial | M | Miscarriage |
| EGAN00001367128 | PP0543 | Facial | M | NND         |
| EGAN00001367167 | PP0582 | Facial | F | NND         |
| EGAN00001410134 | PP1263 | Facial | M | NND         |
| EGAN00001402051 | PP1582 | Facial | F | NND         |
| EGAN00001402057 | PP1591 | Facial | F | NND         |
| EGAN00001402352 | PP1711 | Facial | F | NND         |
| EGAN00001410065 | PP1774 | Facial | F | NND         |
| EGAN00001410080 | PP1789 | Facial | M | NND         |
| EGAN00001428103 | PP1994 | Facial | M | NND         |
| EGAN00001428127 | PP2018 | Facial | M | NND         |
| EGAN00001428163 | PP2054 | Facial | M | NND         |
| EGAN00001472039 | PP2189 | Facial | F | NND         |
| EGAN00001471916 | PP2444 | Facial | M | NND         |
| EGAN00001471931 | PP2456 | Facial | M | NND         |
| EGAN00001471946 | PP2507 | Facial | M | Stillbirth  |
| EGAN00001471895 | PP2540 | Facial | M | Stillbirth  |
| EGAN00001472105 | PP2898 | Facial | F | Stillbirth  |
| EGAN00001476516 | PP2967 | Facial | F | Stillbirth  |
| EGAN00001543662 | PP3015 | Facial | M | Stillbirth  |
| EGAN00001543670 | PP3033 | Facial | M | Stillbirth  |
| EGAN00001543676 | PP3189 | Facial | M | Stillbirth  |
| EGAN00001367062 | PP0399 | Facial | M | Termination |

|                 |        |                   |   |             |
|-----------------|--------|-------------------|---|-------------|
| EGAN00001543665 | PP3243 | Facial            | M | Unknown     |
| EGAN00001366708 | PP0159 | Hydrops           | F | Live birth  |
| EGAN00001366711 | PP0162 | Hydrops           | F | Live birth  |
| EGAN00001366731 | PP0182 | Hydrops           | F | Live birth  |
| EGAN00001366735 | PP0186 | Hydrops           | M | Live birth  |
| EGAN00001366763 | PP0237 | Hydrops           | M | Live birth  |
| EGAN00001366878 | PP0416 | Hydrops           | F | Live birth  |
| EGAN00001366889 | PP0422 | Hydrops           | M | Live birth  |
| EGAN00001367104 | PP0519 | Hydrops           | M | Live birth  |
| EGAN00001367110 | PP0525 | Hydrops           | F | Live birth  |
| EGAN00001366506 | PP0650 | Hydrops           | M | Live birth  |
| EGAN00001366539 | PP0683 | Hydrops           | M | Live birth  |
| EGAN00001402391 | PP0972 | Hydrops           | F | Live birth  |
| EGAN00001402042 | PP1573 | Hydrops           | F | Live birth  |
| EGAN00001402075 | PP1612 | Hydrops           | M | Live birth  |
| EGAN00001410149 | PP1855 | Hydrops           | M | Live birth  |
| EGAN00001428112 | PP2003 | Hydrops           | F | Live birth  |
| EGAN00001428148 | PP2039 | Hydrops           | M | Live birth  |
| EGAN00001428157 | PP2048 | Hydrops           | M | Live birth  |
| EGAN00001543690 | PP2096 | Hydrops           | F | Live birth  |
| EGAN00001471943 | PP2504 | Hydrops           | F | Live birth  |
| EGAN00001472093 | PP2513 | Hydrops           | F | Live birth  |
| EGAN00001471979 | PP2534 | Hydrops           | M | Live birth  |
| EGAN00001472057 | PP2564 | Hydrops           | M | Live birth  |
| EGAN00001472087 | PP2567 | Hydrops           | M | Livebirth   |
| EGAN00001472078 | PP2600 | Hydrops           | F | Livebirth   |
| EGAN00001476483 | PP2934 | Hydrops           | F | Miscarriage |
| EGAN00001588950 | PP3039 | Hydrops           | M | Miscarriage |
| EGAN00001588953 | PP3660 | Hydrops           | F | Miscarriage |
| EGAN00001472096 | PP2609 | Hydrops           | M | Unknown     |
| EGAN00001472135 | PP2678 | Hydrops           | F | Unknown     |
| EGAN00001472138 | PP2681 | Hydrops           | M | Unknown     |
| EGAN00001366705 | PP0156 | Hydrops           | M | Unknown     |
| EGAN00001531017 | PP3078 | Hydrops           | F | Unknown     |
| EGAN00001366673 | PP0123 | Large NT (5.3mm)  | F | Live birth  |
| EGAN00001366685 | PP0135 | Large NT (4mm)    | M | Live birth  |
| EGAN00001366690 | PP0141 | Large NT (7.1mm)  | F | Live birth  |
| EGAN00001366693 | PP0144 | Large NT (5.8mm)  | F | Live birth  |
| EGAN00001366696 | PP0147 | Large NT (5.8mm)  | F | Live birth  |
| EGAN00001366729 | PP0180 | Large NT (5.5mm)  | M | Live birth  |
| EGAN00001366734 | PP0185 | Large NT (4.4mm)  | F | Live birth  |
| EGAN00001366769 | PP0205 | Large NT (5.8mm)  | F | Live birth  |
| EGAN00001366772 | PP0206 | Large NT (11.3mm) | M | Live birth  |
| EGAN00001366778 | PP0209 | Large NT (4.5mm)  | M | Live birth  |
| EGAN00001366757 | PP0234 | Large NT (4.2mm)  | F | Live birth  |
| EGAN00001366775 | PP0243 | Large NT (5.6mm)  | M | Live birth  |
| EGAN00001366808 | PP0261 | Large NT (5.2mm)  | M | Live birth  |
| EGAN00001366813 | PP0264 | Large NT (6.7mm)  | F | Live birth  |
| EGAN00001366819 | PP0270 | Large NT (4.9mm)  | M | Live birth  |
| EGAN00001366822 | PP0273 | Large NT (6.5mm)  | F | Live birth  |

|                 |        |                   |   |            |
|-----------------|--------|-------------------|---|------------|
| EGAN00001366825 | PP0276 | Large NT (4mm)    | M | Live birth |
| EGAN00001366831 | PP0282 | Large NT (8.2mm)  | F | Live birth |
| EGAN00001366834 | PP0285 | Large NT (6.5mm)  | M | Live birth |
| EGAN00001366840 | PP0291 | Large NT (13.7mm) | M | Live birth |
| EGAN00001366846 | PP0297 | Large NT (4.1mm)  | M | Live birth |
| EGAN00001366855 | PP0306 | Large NT (8.8mm)  | F | Live birth |
| EGAN00001366861 | PP0312 | Large NT (4.8mm)  | F | Live birth |
| EGAN00001366964 | PP0348 | Large NT (5.1mm)  | F | Live birth |
| EGAN00001366990 | PP0363 | Large NT (6mm)    | M | Live birth |
| EGAN00001367008 | PP0372 | Large NT (4.5mm)  | F | Live birth |
| EGAN00001367050 | PP0393 | Large NT (7.6mm)  | M | Live birth |
| EGAN00001367056 | PP0396 | Large NT (4.9mm)  | M | Live birth |
| EGAN00001367067 | PP0402 | Large NT (4.3mm)  | M | Live birth |
| EGAN00001367074 | PP0405 | Large NT (5.6mm)  | F | Live birth |
| EGAN00001367080 | PP0408 | Large NT (11.5mm) | M | Live birth |
| EGAN00001366968 | PP0443 | Large NT (5.1mm)  | M | Live birth |
| EGAN00001366995 | PP0455 | Large NT (4.4mm)  | F | Live birth |
| EGAN00001367024 | PP0470 | Large NT (4.3mm)  | F | Live birth |
| EGAN00001367088 | PP0503 | Large NT (4.5mm)  | F | Live birth |
| EGAN00001367107 | PP0522 | Large NT (4.5mm)  | F | Live birth |
| EGAN00001367116 | PP0531 | Large NT (4.4mm)  | F | Live birth |
| EGAN00001367119 | PP0534 | Large NT (6.1mm)  | M | Live birth |
| EGAN00001367152 | PP0567 | Large NT (7mm)    | F | Live birth |
| EGAN00001367164 | PP0579 | Large NT (7.2mm)  | M | Live birth |
| EGAN00001367170 | PP0585 | Large NT (4.6mm)  | F | Live birth |
| EGAN00001366418 | PP0599 | Large NT (4.4mm)  | M | Live birth |
| EGAN00001366422 | PP0602 | Large NT (4.78mm) | M | Live birth |
| EGAN00001366428 | PP0605 | Large NT (4mm)    | M | Live birth |
| EGAN00001366435 | PP0608 | Large NT (5.3mm)  | F | Live birth |
| EGAN00001366441 | PP0611 | Large NT (6.2mm)  | F | Live birth |
| EGAN00001366460 | PP0620 | Large NT (4.2mm)  | M | Live birth |
| EGAN00001366485 | PP0632 | Large NT (4.5mm)  | M | Live birth |
| EGAN00001366494 | PP0638 | Large NT (6mm)    | F | Live birth |
| EGAN00001366518 | PP0662 | Large NT (5mm)    | F | Live birth |
| EGAN00001366521 | PP0665 | Large NT (4.7mm)  | M | Live birth |
| EGAN00001366524 | PP0668 | Large NT (4.5mm)  | M | Live birth |
| EGAN00001366545 | PP0689 | Large NT (4.5mm)  | M | Live birth |
| EGAN00001366452 | PP0707 | Large NT (5mm)    | M | Live birth |
| EGAN00001366482 | PP0722 | Large NT (6.7mm)  | F | Live birth |
| EGAN00001402385 | PP0966 | Large NT (4mm)    | F | Live birth |
| EGAN00001402433 | PP1038 | Large NT (4.4mm)  | M | Live birth |
| EGAN00001402415 | PP1047 | Large NT (5.1mm)  | M | Live birth |
| EGAN00001366564 | PP1336 | Large NT (4.4mm)  | M | Live birth |
| EGAN00001402078 | PP1339 | Large NT (4.4mm)  | M | Live birth |
| EGAN00001366573 | PP1345 | Large NT (4.1mm)  | F | Live birth |
| EGAN00001366588 | PP1354 | Large NT (5.1mm)  | F | Live birth |
| EGAN00001366597 | PP1363 | Large NT (5.1mm)  | M | Live birth |
| EGAN00001366603 | PP1369 | Large NT (8.7mm)  | F | Live birth |
| EGAN00001366606 | PP1372 | Large NT (4.3mm)  | M | Live birth |
| EGAN00001366612 | PP1378 | Large NT (5mm)    | F | Live birth |

|                 |        |                   |   |            |
|-----------------|--------|-------------------|---|------------|
| EGAN00001366615 | PP1381 | Large NT (4.2mm)  | F | Live birth |
| EGAN00001402406 | PP1414 | Large NT (6.5mm)  | M | Live birth |
| EGAN00001428172 | PP1417 | Large NT (4mm)    | F | Live birth |
| EGAN00001402003 | PP1528 | Large NT (9.3mm)  | M | Live birth |
| EGAN00001402018 | PP1546 | Large NT (10mm)   | F | Live birth |
| EGAN00001402440 | PP1585 | Large NT (4mm)    | F | Live birth |
| EGAN00001402441 | PP1594 | Large NT (4.1mm)  | F | Live birth |
| EGAN00001402063 | PP1600 | Large NT (5mm)    | M | Live birth |
| EGAN00001402072 | PP1609 | Large NT (4mm)    | F | Live birth |
| EGAN00001410132 | PP1633 | Large NT (4.4mm)  | F | Live birth |
| EGAN00001402128 | PP1645 | Large NT (4.4mm)  | M | Live birth |
| EGAN00001402143 | PP1660 | Large NT (4.04mm) | M | Live birth |
| EGAN00001402370 | PP1723 | Large NT (5mm)    | M | Live birth |
| EGAN00001402376 | PP1729 | Large NT (4.1mm)  | M | Live birth |
| EGAN00001476542 | PP1762 | Large NT (5.4mm)  | F | Live birth |
| EGAN00001410098 | PP1807 | Large NT (4.7mm)  | M | Live birth |
| EGAN00001410140 | PP1846 | Large NT (4.2mm)  | M | Live birth |
| EGAN00001410143 | PP1849 | Large NT (4.4mm)  | F | Live birth |
| EGAN00001410146 | PP1852 | Large NT (6mm)    | F | Live birth |
| EGAN00001410152 | PP1858 | Large NT (4mm)    | M | Live birth |
| EGAN00001428088 | PP1979 | Large NT (5.3mm)  | F | Live birth |
| EGAN00001428091 | PP1982 | Large NT (4.8mm)  | M | Live birth |
| EGAN00001428136 | PP2027 | Large NT (4.1mm)  | M | Live birth |
| EGAN00001428166 | PP2057 | Large NT (4.5mm)  | M | Live birth |
| EGAN00001471937 | PP2093 | Large NT (4.4mm)  | F | Live birth |
| EGAN00001471898 | PP2477 | Large NT (4.2mm)  | F | Live birth |
| EGAN00001471982 | PP2537 | Large NT (4.6mm)  | M | Live birth |
| EGAN00001402430 | PP1471 | Multisystem       | M | Live birth |
| EGAN00001410137 | PP1843 | Multisystem       | M | Live birth |
| EGAN00001428109 | PP2000 | Multisystem       | M | Live birth |
| EGAN00001366640 | PP0090 | Multisystem       | M | Live birth |
| EGAN00001366646 | PP0096 | Multisystem       | F | Live birth |
| EGAN00001366676 | PP0126 | Multisystem       | M | Live birth |
| EGAN00001366720 | PP0171 | Multisystem       | F | Live birth |
| EGAN00001366723 | PP0174 | Multisystem       | F | Live birth |
| EGAN00001366740 | PP0225 | Multisystem       | M | Live birth |
| EGAN00001366797 | PP0255 | Multisystem       | M | Live birth |
| EGAN00001366864 | PP0315 | Multisystem       | F | Live birth |
| EGAN00001366880 | PP0324 | Multisystem       | F | Live birth |
| EGAN00001366886 | PP0327 | Multisystem       | M | Live birth |
| EGAN00001366953 | PP0342 | Multisystem       | F | Live birth |
| EGAN00001366960 | PP0440 | Multisystem       | F | Live birth |
| EGAN00001366975 | PP0446 | Multisystem       | F | Live birth |
| EGAN00001367030 | PP0473 | Multisystem       | M | Live birth |
| EGAN00001367048 | PP0482 | Multisystem       | M | Live birth |
| EGAN00001367084 | PP0500 | Multisystem       | M | Live birth |
| EGAN00001367125 | PP0540 | Multisystem       | F | Live birth |
| EGAN00001367137 | PP0552 | Multisystem       | F | Live birth |
| EGAN00001367140 | PP0555 | Multisystem       | M | Live birth |
| EGAN00001367155 | PP0570 | Multisystem       | F | Live birth |

|                 |        |             |   |            |
|-----------------|--------|-------------|---|------------|
| EGAN00001367158 | PP0573 | Multisystem | F | Live birth |
| EGAN00001366454 | PP0617 | Multisystem | F | Live birth |
| EGAN00001366467 | PP0623 | Multisystem | F | Live birth |
| EGAN00001366473 | PP0626 | Multisystem | M | Live birth |
| EGAN00001366479 | PP0629 | Multisystem | F | Live birth |
| EGAN00001366503 | PP0647 | Multisystem | F | Live birth |
| EGAN00001366515 | PP0659 | Multisystem | M | Live birth |
| EGAN00001366536 | PP0680 | Multisystem | M | Live birth |
| EGAN00001366440 | PP0701 | Multisystem | M | Live birth |
| EGAN00001366458 | PP0710 | Multisystem | F | Live birth |
| EGAN00001366463 | PP0713 | Multisystem | F | Live birth |
| EGAN00001366576 | PP0795 | Multisystem | F | Live birth |
| EGAN00001402436 | PP0948 | Multisystem | F | Live birth |
| EGAN00001402421 | PP0984 | Multisystem | M | Live birth |
| EGAN00001402424 | PP1044 | Multisystem | M | Live birth |
| EGAN00001366585 | PP1351 | Multisystem | F | Live birth |
| EGAN00001366624 | PP1390 | Multisystem | M | Live birth |
| EGAN00001366627 | PP1393 | Multisystem | F | Live birth |
| EGAN00001410155 | PP1408 | Multisystem | M | Live birth |
| EGAN00001402427 | PP1420 | Multisystem | F | Live birth |
| EGAN00001410173 | PP1462 | Multisystem | M | Live birth |
| EGAN00001401997 | PP1522 | Multisystem | F | Live birth |
| EGAN00001402009 | PP1534 | Multisystem | F | Live birth |
| EGAN00001402104 | PP1621 | Multisystem | F | Live birth |
| EGAN00001402442 | PP1627 | Multisystem | F | Live birth |
| EGAN00001402119 | PP1636 | Multisystem | M | Live birth |
| EGAN00001402131 | PP1648 | Multisystem | M | Live birth |
| EGAN00001402137 | PP1654 | Multisystem | M | Live birth |
| EGAN00001402140 | PP1657 | Multisystem | F | Live birth |
| EGAN00001402146 | PP1663 | Multisystem | M | Live birth |
| EGAN00001402161 | PP1678 | Multisystem | M | Live birth |
| EGAN00001402164 | PP1681 | Multisystem | M | Live birth |
| EGAN00001402170 | PP1687 | Multisystem | M | Live birth |
| EGAN00001402179 | PP1696 | Multisystem | F | Live birth |
| EGAN00001402409 | PP1738 | Multisystem | F | Live birth |
| EGAN00001410044 | PP1753 | Multisystem | F | Live birth |
| EGAN00001410047 | PP1756 | Multisystem | M | Live birth |
| EGAN00001410059 | PP1768 | Multisystem | F | Live birth |
| EGAN00001410071 | PP1780 | Multisystem | M | Live birth |
| EGAN00001410077 | PP1786 | Multisystem | M | Live birth |
| EGAN00001410086 | PP1795 | Multisystem | M | Live birth |
| EGAN00001410104 | PP1813 | Multisystem | F | Live birth |
| EGAN00001410116 | PP1825 | Multisystem | F | Live birth |
| EGAN00001410158 | PP1861 | Multisystem | F | Live birth |
| EGAN00001410176 | PP1876 | Multisystem | F | Live birth |
| EGAN00001428004 | PP1895 | Multisystem | M | Live birth |
| EGAN00001428010 | PP1901 | Multisystem | M | Live birth |
| EGAN00001428013 | PP1904 | Multisystem | M | Live birth |
| EGAN00001428070 | PP1961 | Multisystem | M | Live birth |
| EGAN00001428076 | PP1967 | Multisystem | M | Live birth |

|                 |        |             |   |            |
|-----------------|--------|-------------|---|------------|
| EGAN00001428115 | PP2006 | Multisystem | M | Live birth |
| EGAN00001428124 | PP2015 | Multisystem | F | Live birth |
| EGAN00001428145 | PP2036 | Multisystem | M | Live birth |
| EGAN00001428151 | PP2042 | Multisystem | M | Live birth |
| EGAN00001428169 | PP2060 | Multisystem | M | Live birth |
| EGAN00001589007 | PP2084 | Multisystem | F | Live birth |
| EGAN00001471949 | PP2099 | Multisystem | F | Live birth |
| EGAN00001471888 | PP2159 | Multisystem | F | Live birth |
| EGAN00001472141 | PP2351 | Multisystem | M | Live birth |
| EGAN00001471892 | PP2378 | Multisystem | F | Live birth |
| EGAN00001471925 | PP2396 | Multisystem | F | Live birth |
| EGAN00001471958 | PP2399 | Multisystem | F | Live birth |
| EGAN00001471961 | PP2402 | Multisystem | M | Live birth |
| EGAN00001471904 | PP2480 | Multisystem | F | Live birth |
| EGAN00001471910 | PP2489 | Multisystem | F | Live birth |
| EGAN00001472072 | PP2492 | Multisystem | M | Live birth |
| EGAN00001471940 | PP2501 | Multisystem | M | Live birth |
| EGAN00001471973 | PP2528 | Multisystem | M | Live birth |
| EGAN00001472111 | PP2621 | Multisystem | F | Live birth |
| EGAN00001472132 | PP2624 | Multisystem | M | Live birth |
| EGAN00001472060 | PP2630 | Multisystem | F | Live birth |
| EGAN00001472063 | PP2633 | Multisystem | M | Live birth |
| EGAN00001471952 | PP2645 | Multisystem | M | Live birth |
| EGAN00001471864 | PP2687 | Multisystem | F | Live birth |
| EGAN00001471882 | PP2705 | Multisystem | M | Live birth |
| EGAN00001471991 | PP2718 | Multisystem | M | Live birth |
| EGAN00001472009 | PP2736 | Multisystem | M | Live birth |
| EGAN00001472024 | PP2751 | Multisystem | M | Live birth |
| EGAN00001472048 | PP2772 | Multisystem | F | Live birth |
| EGAN00001472117 | PP2811 | Multisystem | F | Live birth |
| EGAN00001472114 | PP2862 | Multisystem | F | Live birth |
| EGAN00001472099 | PP2892 | Multisystem | M | Live birth |
| EGAN00001476462 | PP2913 | Multisystem | F | Live birth |
| EGAN00001476489 | PP2940 | Multisystem | F | Live birth |
| EGAN00001476504 | PP2955 | Multisystem | M | Live birth |
| EGAN00001476510 | PP2961 | Multisystem | F | Live birth |
| EGAN00001476513 | PP2964 | Multisystem | F | Live birth |
| EGAN00001476522 | PP2973 | Multisystem | M | Live birth |
| EGAN00001476527 | PP2979 | Multisystem | M | Live birth |
| EGAN00001476530 | PP2982 | Multisystem | F | Live birth |
| EGAN00001543704 | PP3018 | Multisystem | M | Live birth |
| EGAN00001543696 | PP3042 | Multisystem | M | Live birth |
| EGAN00001589013 | PP3045 | Multisystem | M | Live birth |
| EGAN00001589022 | PP3168 | Multisystem | F | Live birth |
| EGAN00001589019 | PP3186 | Multisystem | M | Live birth |
| EGAN00001543733 | PP3261 | Multisystem | F | Live birth |
| EGAN00001598958 | PP3273 | Multisystem | M | Live birth |
| EGAN00001598925 | PP3282 | Multisystem | M | Live birth |
| EGAN00001588983 | PP3384 | Multisystem | M | Live birth |
| EGAN00001588974 | PP3387 | Multisystem | M | Live birth |

|                 |        |             |   |             |
|-----------------|--------|-------------|---|-------------|
| EGAN00001588971 | PP3513 | Multisystem | M | Live birth  |
| EGAN00001589016 | PP3522 | Multisystem | M | Live birth  |
| EGAN00001588962 | PP3573 | Multisystem | M | Live birth  |
| EGAN00001598922 | PP3597 | Multisystem | F | Live birth  |
| EGAN00001598952 | PP3615 | Multisystem | M | Live birth  |
| EGAN00001598973 | PP3627 | Multisystem | M | Live birth  |
| EGAN00001598985 | PP3636 | Multisystem | M | Live birth  |
| EGAN00001599000 | PP3651 | Multisystem | M | Live birth  |
| EGAN00001599006 | PP3657 | Multisystem | M | Live birth  |
| EGAN00001543707 | PP0981 | Multisystem | F | Unknown     |
| EGAN00001543736 | PP1206 | Multisystem | F | Unknown     |
| EGAN00001543729 | PP3255 | Multisystem | M | Unknown     |
| EGAN00001543731 | PP3258 | Multisystem | F | Unknown     |
| EGAN00001476541 | PP1952 | Multisystem | M | Unknown     |
| EGAN00001472042 | PP2766 | Multisystem | F | Unknown     |
| EGAN00001366512 | PP0656 | Multisystem | M | Unknown     |
| EGAN00001589031 | PP3339 | Multisystem | F | Unknown     |
| EGAN00001598964 | PP3423 | Multisystem | F | Unknown     |
| EGAN00001598928 | PP3600 | Multisystem | M | Unknown     |
| EGAN00001598970 | PP3624 | Multisystem | M | Unknown     |
| EGAN00001366774 | PP0207 | Renal       | M | Live birth  |
| EGAN00001366791 | PP0252 | Renal       | M | Live birth  |
| EGAN00001366969 | PP0351 | Renal       | M | Live birth  |
| EGAN00001367002 | PP0369 | Renal       | M | Live birth  |
| EGAN00001366486 | PP0458 | Renal       | M | Live birth  |
| EGAN00001367095 | PP0510 | Renal       | F | Live birth  |
| EGAN00001367149 | PP0564 | Renal       | M | Live birth  |
| EGAN00001402079 | PP1375 | Renal       | M | Live birth  |
| EGAN00001402024 | PP1552 | Renal       | M | Live birth  |
| EGAN00001402036 | PP1567 | Renal       | F | Live birth  |
| EGAN00001410056 | PP1765 | Renal       | M | Live birth  |
| EGAN00001428160 | PP2051 | Renal       | M | Live birth  |
| EGAN00001472027 | PP2754 | Renal       | M | Live birth  |
| EGAN00001472129 | PP2814 | Renal       | M | Live birth  |
| EGAN00001589004 | PP3111 | Renal       | M | Live birth  |
| EGAN00001598976 | PP3630 | Renal       | M | Live birth  |
| EGAN00001472054 | PP2823 | Skeletal    | M | Live birth  |
| EGAN00001543709 | PP3093 | Skeletal    | M | Live birth  |
| EGAN00001530991 | PP3132 | Skeletal    | M | Live birth  |
| EGAN00001530988 | PP3135 | Skeletal    | M | Live birth  |
| EGAN00001543687 | PP3195 | Skeletal    | F | Live birth  |
| EGAN00001543726 | PP3219 | Skeletal    | M | Live birth  |
| EGAN00001543741 | PP3264 | Skeletal    | M | Live birth  |
| EGAN00001531047 | PP3330 | Skeletal    | M | Live birth  |
| EGAN00001531050 | PP3333 | Skeletal    | F | Live birth  |
| EGAN00001598979 | PP3411 | Skeletal    | F | Live birth  |
| EGAN00001588959 | PP3540 | Skeletal    | F | Live birth  |
| EGAN00001598931 | PP3603 | Skeletal    | F | Live birth  |
| EGAN00001598946 | PP3609 | Skeletal    | F | Live birth  |
| EGAN00001402152 | PP1669 | Skeletal    | F | Miscarriage |

|                 |        |          |   |         |
|-----------------|--------|----------|---|---------|
| EGAN00001402012 | PP1537 | Skeletal | F | NND     |
| EGAN00001543721 | PP3252 | Skeletal | F | Unknown |
| EGAN00001367179 | PP0594 | Skeletal | M | Unknown |
| EGAN00001543685 | PP3246 | Skeletal | M | Unknown |
| EGAN00001543702 | PP3249 | Skeletal | M | Unknown |
| EGAN00001598967 | PP3621 | Skeletal | M | Unknown |
| EGAN00001366413 | PP0087 | Skeletal | F | Unknown |
| EGAN00001366664 | PP0114 | Skeletal | M | Unknown |
| EGAN00001366667 | PP0117 | Skeletal | M | Unknown |
| EGAN00001366670 | PP0120 | Skeletal | M | Unknown |
| EGAN00001366679 | PP0129 | Skeletal | M | Unknown |
| EGAN00001366714 | PP0165 | Skeletal | M | Unknown |
| EGAN00001366768 | PP0204 | Skeletal | F | Unknown |
| EGAN00001366776 | PP0208 | Skeletal | F | Unknown |
| EGAN00001366858 | PP0309 | Skeletal | F | Unknown |
| EGAN00001366867 | PP0318 | Skeletal | F | Unknown |
| EGAN00001366985 | PP0360 | Skeletal | M | Unknown |
| EGAN00001367027 | PP0381 | Skeletal | M | Unknown |
| EGAN00001366883 | PP0419 | Skeletal | F | Unknown |
| EGAN00001366490 | PP0485 | Skeletal | M | Unknown |
| EGAN00001367122 | PP0537 | Skeletal | M | Unknown |
| EGAN00001367131 | PP0546 | Skeletal | M | Unknown |
| EGAN00001367161 | PP0576 | Skeletal | F | Unknown |
| EGAN00001366500 | PP0644 | Skeletal | M | Unknown |
| EGAN00001366552 | PP0792 | Skeletal | F | Unknown |
| EGAN00001366546 | PP1324 | Skeletal | M | Unknown |
| EGAN00001366570 | PP1342 | Skeletal | M | Unknown |
| EGAN00001366579 | PP1348 | Skeletal | M | Unknown |
| EGAN00001366591 | PP1357 | Skeletal | M | Unknown |
| EGAN00001402394 | PP1447 | Skeletal | M | Unknown |
| EGAN00001402015 | PP1540 | Skeletal | M | Unknown |
| EGAN00001402030 | PP1561 | Skeletal | F | Unknown |
| EGAN00001402045 | PP1576 | Skeletal | F | Unknown |
| EGAN00001402054 | PP1588 | Skeletal | F | Unknown |
| EGAN00001402122 | PP1639 | Skeletal | M | Unknown |
| EGAN00001402125 | PP1642 | Skeletal | M | Unknown |
| EGAN00001402134 | PP1651 | Skeletal | F | Unknown |
| EGAN00001428043 | PP1934 | Skeletal | M | Unknown |
| EGAN00001428058 | PP1949 | Skeletal | F | Unknown |
| EGAN00001428085 | PP1976 | Skeletal | F | Unknown |
| EGAN00001428094 | PP1985 | Skeletal | M | Unknown |
| EGAN00001428097 | PP1988 | Skeletal | M | Unknown |
| EGAN00001428118 | PP2009 | Skeletal | M | Unknown |
| EGAN00001543738 | PP2141 | Skeletal | M | Unknown |
| EGAN00001471922 | PP2543 | Skeletal | M | Unknown |
| EGAN00001472051 | PP2627 | Skeletal | M | Unknown |
| EGAN00001472066 | PP2636 | Skeletal | M | Unknown |
| EGAN00001471891 | PP2711 | Skeletal | F | Unknown |
| EGAN00001471997 | PP2724 | Skeletal | M | Unknown |
| EGAN00001472021 | PP2748 | Skeletal | M | Unknown |



|                 |        |          |   |         |
|-----------------|--------|----------|---|---------|
| EGAN00001472033 | PP2760 | Skeletal | F | Unknown |
| EGAN00001366649 | PP0099 | Spinal   | M | Unknown |
| EGAN00001366652 | PP0102 | Spinal   | F | Unknown |
| EGAN00001366702 | PP0153 | Spinal   | M | Unknown |
| EGAN00001366873 | PP0321 | Spinal   | F | Unknown |
| EGAN00001366527 | PP0671 | Spinal   | M | Unknown |
| EGAN00001402066 | PP1603 | Spinal   | F | Unknown |
| EGAN00001402069 | PP1606 | Spinal   | M | Unknown |
| EGAN00001410128 | PP1837 | Spinal   | M | Unknown |
| EGAN00001476453 | PP2904 | Spinal   | M | Unknown |
| EGAN00001476468 | PP2919 | Spinal   | F | Unknown |

**Supplementary Table 7:** Details of cases with non-diagnostic but potentially clinically relevant variants

| EGA_ID          | PP_ID  | Phenotypic Class | Gene     | Variant type                      | Inheritance                          | Zygotity              |
|-----------------|--------|------------------|----------|-----------------------------------|--------------------------------------|-----------------------|
| EGAN00001366679 | PP0129 | Skeletal         | FLNA     | missense_variant                  | inherited from unaffected mother (X) | Homozygous            |
| EGAN00001366482 | PP0722 | Large NT>4.0     | KMT2D    | missense_variant                  | de novo                              | Heterozygous          |
| EGAN00001366603 | PP1369 | Large NT>4.0     | NRAS     | missense_variant                  | de novo                              | Heterozygous          |
| EGAN00001366861 | PP0312 | Large NT>4.0     | KIAA0586 | missense_variant                  | inherited                            | Homozygous            |
| EGAN00001367002 | PP0369 | Renal            | FLNA     | missense_variant                  | inherited from unaffected mother (X) | Homozygous            |
| EGAN00001401997 | PP1522 | Multisystem      | RECQL4   | missense/stop gained              | inherited                            | Compound heterozygous |
| EGAN00001402003 | PP1528 | Large NT>4.0     | PTPN11   | missense_variant                  | de novo                              | Heterozygous          |
| EGAN00001366931 | PP0425 | Cardiac          | HYDIN    | missense variant/missense variant | inherited                            | Compound heterozygous |
| EGAN00001402367 | PP1720 | Brain            | CHD7     | stop_gained                       | de novo                              | Heterozygous          |
| EGAN00001402370 | PP1723 | Large NT>4.0     | KMT2A    | frameshift_variant                | de novo                              | Heterozygous          |
| EGAN00001366546 | PP1324 | Skeletal         | TUBA1A   | missense_variant                  | de novo                              | Heterozygous          |
| EGAN00001366636 | PP1396 | Brain            | MBTPS2   | missense_variant                  | inherited from unaffected mother (X) | Homozygous            |
| EGAN00001471867 | PP2690 | Brain            | MECP2    | missense variant                  | inherited from unaffected mother (X) | Heterozygous          |

|                 |        |              |            |                                   |                                          |                       |
|-----------------|--------|--------------|------------|-----------------------------------|------------------------------------------|-----------------------|
| EGAN00001472069 | PP2886 | Cardiac      | PROK2      | splice_acceptor_variant           | inherited from similarly affected mother | Heterozygous          |
| EGAN00001402021 | PP1549 | Cardiac      | ROBO1      | splice_acceptor_variant           | de novo                                  | Heterozygous          |
| EGAN00001367170 | PP0585 | Large NT>4.0 | ROBO1      | frameshift_variant                | de novo                                  | Heterozygous          |
| EGAN00001531002 | PP3144 | Abdominal    | ATRX       | missense_variant                  | inherited from unaffected mother (X)     | Hemizygous            |
| EGAN00001598937 | PP3285 | Cardiac      | ACTB       | missense_variant                  | de novo                                  | Heterozygous          |
| EGAN00001588977 | PP3474 | Brain        | KCNQ2      | missense_variant                  | de novo                                  | Heterozygous          |
| EGAN00001589013 | PP3045 | Multisystem  | BCS1L      | missense variant/missense variant | inherited                                | Compound heterozygous |
| EGAN00001531035 | PP3318 | Chest        | PACS1      | missense_variant                  | de novo                                  | Heterozygous          |
| EGAN00001471958 | PP2399 | Multisystem  | NSD1       | missense_variant                  | de novo                                  | Heterozygous          |
| EGAN00001428160 | PP2051 | Renal        | FOXF1 FOX2 | Deletion (183kb)                  | de novo                                  | Heterozygous          |
| EGAN00001366772 | PP0206 | Large NT>4.0 | SLC9A6     | Deletion (375bp)                  | de novo                                  | Hemizygous            |

**Supplementary Table 8: Percent of protein coding region covered by  $\geq 13X$  for DDG2P gene panel.**

| chromosome | start    | stop     | gene     | hgnc_id | Percent of protein coding region |
|------------|----------|----------|----------|---------|----------------------------------|
|            |          |          |          |         | covered by $\geq 13X$            |
| 1          | 1167629  | 1170421  | B3GALT6  | 17978   | 72.42                            |
| 1          | 1167629  | 1170421  | B3GALT6  | 17978   | 72.42                            |
| 1          | 1270656  | 1284730  | DVL1     | 3084    | 100.00                           |
| 1          | 1447531  | 1470067  | ATAD3A   | 25567   | 87.56                            |
| 1          | 1447531  | 1470067  | ATAD3A   | 25567   | 87.56                            |
| 1          | 1716729  | 1822495  | GNB1     | 4396    | 100.00                           |
| 1          | 2160134  | 2241558  | SKI      | 10896   | 100.00                           |
| 1          | 2336236  | 2345236  | PEX10    | 8851    | 95.94                            |
| 1          | 2336236  | 2345236  | PEX10    | 8851    | 95.94                            |
| 1          | 2336236  | 2345236  | PEX10    | 8851    | 95.94                            |
| 1          | 3728645  | 3773778  | CEP104   | 24866   | 98.92                            |
| 1          | 5922871  | 6052533  | NPHP4    | 19104   | 98.78                            |
| 1          | 6845384  | 7829766  | CAMTA1   | 18806   | 100.00                           |
| 1          | 8377886  | 8404227  | SLC45A1  | 17939   | 100.00                           |
| 1          | 8412457  | 8877702  | RERE     | 9965    | 96.04                            |
| 1          | 10003486 | 10045559 | NMNAT1   | 17877   | 99.29                            |
| 1          | 10532345 | 10690815 | PEX14    | 8856    | 98.28                            |
| 1          | 10532345 | 10690815 | PEX14    | 8856    | 98.28                            |
| 1          | 11166592 | 11322564 | MTOR     | 3942    | 100.00                           |
| 1          | 11845780 | 11866977 | MTHFR    | 7436    | 100.00                           |
| 1          | 11994262 | 12035595 | PLOD1    | 9081    | 99.12                            |
| 1          | 16370272 | 16383803 | CLCNKB   | 2027    | 96.03                            |
| 1          | 17312453 | 17338423 | ATP13A2  | 30213   | 100.00                           |
| 1          | 19197926 | 19229275 | ALDH4A1  | 406     | 99.16                            |
| 1          | 19542158 | 19578046 | EMC1     | 28957   | 100.00                           |
| 1          | 19542158 | 19578046 | EMC1     | 28957   | 100.00                           |
| 1          | 20978270 | 20988000 | DDOST    | 2728    | 100.00                           |
| 1          | 21835858 | 21904905 | ALPL     | 438     | 100.00                           |
| 1          | 22148738 | 22263790 | HSPG2    | 5273    | 96.19                            |
| 1          | 22148738 | 22263790 | HSPG2    | 5273    | 96.19                            |
| 1          | 22443798 | 22470462 | WNT4     | 12783   | 92.71                            |
| 1          | 22443798 | 22470462 | WNT4     | 12783   | 92.71                            |
| 1          | 23345941 | 23410182 | KDM1A    | 29079   | 100.00                           |
| 1          | 24122089 | 24127271 | GALE     | 4116    | 100.00                           |
| 1          | 24128375 | 24165110 | HMGCL    | 5005    | 100.00                           |
| 1          | 24171567 | 24194784 | FUCA1    | 4006    | 100.00                           |
| 1          | 24645812 | 24690972 | GRHL3    | 25839   | 100.00                           |
| 1          | 26758773 | 26797785 | DHDDS    | 20603   | 100.00                           |
| 1          | 27022524 | 27108595 | ARID1A   | 11110   | 96.43                            |
| 1          | 27113963 | 27124889 | PIGV     | 26031   | 100.00                           |
| 1          | 27860546 | 27930942 | AHDC1    | 25230   | 99.94                            |
| 1          | 29519385 | 29557454 | MECR     | 19691   | 100.00                           |
| 1          | 33473585 | 33546597 | AK2      | 362     | 93.06                            |
| 1          | 40420802 | 40435638 | MFS2A    | 25897   | 100.00                           |
| 1          | 40538379 | 40563375 | PPT1     | 9325    | 100.00                           |
| 1          | 40723779 | 40759856 | ZMPSTE24 | 12877   | 99.37                            |

|   |           |           |          |       |        |
|---|-----------|-----------|----------|-------|--------|
| 1 | 40723779  | 40759856  | ZMPSTE24 | 12877 | 99.37  |
| 1 | 40766159  | 40783488  | COL9A2   | 2218  | 97.52  |
| 1 | 40766159  | 40783488  | COL9A2   | 2218  | 97.52  |
| 1 | 43198764  | 43205925  | CLDN19   | 2040  | 96.89  |
| 1 | 43212006  | 43232755  | P3H1     | 19316 | 100.00 |
| 1 | 43391052  | 43424530  | SLC2A1   | 11005 | 100.00 |
| 1 | 43391052  | 43424530  | SLC2A1   | 11005 | 100.00 |
| 1 | 43855553  | 43918321  | SZT2     | 29040 | 99.81  |
| 1 | 44171495  | 44396831  | ST3GAL3  | 10866 | 100.00 |
| 1 | 44457172  | 44497139  | SLC6A9   | 11056 | 100.00 |
| 1 | 45805342  | 45809647  | TOE1     | 15954 | 100.00 |
| 1 | 45965725  | 45976739  | MMACHC   | 24525 | 100.00 |
| 1 | 46654354  | 46685977  | POMGNT1  | 19139 | 100.00 |
| 1 | 46654354  | 46685977  | POMGNT1  | 19139 | 100.00 |
| 1 | 46654354  | 46685977  | POMGNT1  | 19139 | 100.00 |
| 1 | 47715811  | 47779819  | STIL     | 10879 | 100.00 |
| 1 | 47881744  | 47883723  | FOXE3    | 3808  | 71.25  |
| 1 | 47881744  | 47883723  | FOXE3    | 3808  | 71.25  |
| 1 | 52838501  | 52870131  | ORC1     | 8487  | 100.00 |
| 1 | 55315306  | 55352891  | DHCR24   | 2859  | 100.00 |
| 1 | 55464606  | 55476556  | BSND     | 16512 | 100.00 |
| 1 | 62920399  | 63153969  | DOCK7    | 19190 | 100.00 |
| 1 | 63833261  | 63904233  | ALG6     | 23157 | 92.18  |
| 1 | 64058947  | 64125916  | PGM1     | 8905  | 100.00 |
| 1 | 67465015  | 67519782  | SLC35D1  | 20800 | 100.00 |
| 1 | 68894505  | 68915642  | RPE65    | 10294 | 100.00 |
| 1 | 76190036  | 76253260  | ACADM    | 89    | 100.00 |
| 1 | 92711959  | 92764544  | GLMN     | 14373 | 95.07  |
| 1 | 100315640 | 100389579 | AGL      | 321   | 99.83  |
| 1 | 100652475 | 100715390 | DBT      | 2698  | 96.55  |
| 1 | 103342023 | 103574052 | COL11A1  | 2186  | 100.00 |
| 1 | 103342023 | 103574052 | COL11A1  | 2186  | 100.00 |
| 1 | 108676658 | 108743471 | SLC25A24 | 20662 | 100.00 |
| 1 | 109417972 | 109477167 | GPSM2    | 29501 | 98.42  |
| 1 | 109605108 | 109618624 | TAF13    | 11546 | 100.00 |
| 1 | 110091233 | 110136975 | GNAI3    | 4387  | 92.74  |
| 1 | 110158726 | 110174673 | AMPD2    | 469   | 98.72  |
| 1 | 110602616 | 110613322 | ALX3     | 449   | 89.53  |
| 1 | 110693108 | 110744824 | SLC6A17  | 31399 | 100.00 |
| 1 | 111136202 | 111174096 | KCNA2    | 6220  | 100.00 |
| 1 | 111136202 | 111174096 | KCNA2    | 6220  | 100.00 |
| 1 | 113615831 | 113674882 | LRIG2    | 20889 | 100.00 |
| 1 | 114437370 | 114447823 | AP4B1    | 572   | 97.21  |
| 1 | 115247090 | 115259515 | NRAS     | 7989  | 100.00 |
| 1 | 115572415 | 115576941 | TSHB     | 12372 | 100.00 |
| 1 | 119425669 | 119532179 | TBX15    | 11594 | 100.00 |
| 1 | 120202421 | 120286838 | PHGDH    | 8923  | 99.17  |
| 1 | 120202421 | 120286838 | PHGDH    | 8923  | 99.17  |
| 1 | 120290619 | 120311528 | HMGCS2   | 5008  | 99.08  |
| 1 | 120454176 | 120612240 | NOTCH2   | 7882  | 98.79  |

|   |           |           |         |       |        |
|---|-----------|-----------|---------|-------|--------|
| 1 | 145507598 | 145513536 | RBM8A   | 9905  | 96.00  |
| 1 | 145516252 | 145523730 | PEX11B  | 8853  | 100.00 |
| 1 | 147374946 | 147381393 | GJA8    | 4281  | 100.00 |
| 1 | 147374946 | 147381393 | GJA8    | 4281  | 100.00 |
| 1 | 149895209 | 149900236 | SF3B4   | 10771 | 97.80  |
| 1 | 150768684 | 150780799 | CTSK    | 2536  | 100.00 |
| 1 | 150980896 | 151008189 | PRUNE1  | 13420 | 100.00 |
| 1 | 151375200 | 151431941 | POGZ    | 18801 | 98.57  |
| 1 | 153777201 | 153895451 | GATAD2B | 30778 | 100.00 |
| 1 | 154244987 | 154248351 | HAX1    | 16915 | 100.00 |
| 1 | 154540257 | 154552502 | CHRN2   | 1962  | 100.00 |
| 1 | 154540257 | 154552502 | CHRN2   | 1962  | 100.00 |
| 1 | 154554538 | 154600475 | ADAR    | 225   | 100.00 |
| 1 | 154554538 | 154600475 | ADAR    | 225   | 100.00 |
| 1 | 154554538 | 154600475 | ADAR    | 225   | 100.00 |
| 1 | 154955814 | 154965587 | FLAD1   | 24671 | 100.00 |
| 1 | 155112367 | 155113071 | DPM3    | 3007  | 100.00 |
| 1 | 155204243 | 155214490 | GBA     | 4177  | 100.00 |
| 1 | 155204243 | 155214490 | GBA     | 4177  | 100.00 |
| 1 | 155204243 | 155214490 | GBA     | 4177  | 100.00 |
| 1 | 155204243 | 155214490 | GBA     | 4177  | 100.00 |
| 1 | 155204243 | 155214490 | GBA     | 4177  | 100.00 |
| 1 | 155204243 | 155214490 | GBA     | 4177  | 100.00 |
| 1 | 155204243 | 155214490 | GBA     | 4177  | 100.00 |
| 1 | 155867599 | 155881195 | RIT1    | 10023 | 100.00 |
| 1 | 156052364 | 156109880 | LMNA    | 6636  | 90.23  |
| 1 | 156052364 | 156109880 | LMNA    | 6636  | 90.23  |
| 1 | 156052364 | 156109880 | LMNA    | 6636  | 90.23  |
| 1 | 156052364 | 156109880 | LMNA    | 6636  | 90.23  |
| 1 | 156052364 | 156109880 | LMNA    | 6636  | 90.23  |
| 1 | 156052364 | 156109880 | LMNA    | 6636  | 90.23  |
| 1 | 156052364 | 156109880 | LMNA    | 6636  | 90.23  |
| 1 | 156052364 | 156109880 | LMNA    | 6636  | 90.23  |
| 1 | 156052364 | 156109880 | LMNA    | 6636  | 90.23  |
| 1 | 156052364 | 156109880 | LMNA    | 6636  | 90.23  |
| 1 | 156052364 | 156109880 | LMNA    | 6636  | 90.23  |
| 1 | 156052364 | 156109880 | LMNA    | 6636  | 90.23  |
| 1 | 156561554 | 156564091 | NAXE    | 18453 | 100.00 |
| 1 | 156785432 | 156851642 | NTRK1   | 8031  | 100.00 |
| 1 | 160007257 | 160040038 | KCNJ10  | 6256  | 98.51  |
| 1 | 160246602 | 160256138 | PEX19   | 9713  | 99.00  |
| 1 | 160246602 | 160256138 | PEX19   | 9713  | 99.00  |
| 1 | 161040785 | 161059389 | NECTIN4 | 19688 | 99.15  |
| 1 | 162601163 | 162757190 | DDR2    | 2731  | 98.85  |
| 1 | 165696032 | 165796992 | TMCO1   | 18188 | 100.00 |
| 1 | 170501270 | 170522587 | GORAB   | 25676 | 100.00 |
| 1 | 173793641 | 173827684 | DARS2   | 25538 | 100.00 |
| 1 | 179519674 | 179545087 | NPHS2   | 13394 | 97.48  |
| 1 | 180199421 | 180249380 | LHX4    | 21734 | 100.00 |
| 1 | 182350839 | 182361341 | GLUL    | 4341  | 97.59  |
| 1 | 184020811 | 184043346 | TSEN15  | 16791 | 90.70  |
| 1 | 197053258 | 197115824 | ASPM    | 19048 | 97.78  |

|   |           |           |           |       |        |
|---|-----------|-----------|-----------|-------|--------|
| 1 | 197170592 | 197447585 | CRB1      | 2343  | 100.00 |
| 1 | 197170592 | 197447585 | CRB1      | 2343  | 100.00 |
| 1 | 200593024 | 200639097 | DDX59     | 25360 | 100.00 |
| 1 | 202300785 | 202311108 | UBE2T     | 25009 | 100.00 |
| 1 | 202696526 | 202778598 | KDM5B     | 18039 | 100.00 |
| 1 | 203830731 | 203839678 | SNRPE     | 11161 | 89.96  |
| 1 | 205111632 | 205180727 | DSTYK     | 29043 | 97.96  |
| 1 | 209959036 | 209979465 | IRF6      | 6121  | 95.37  |
| 1 | 209959036 | 209979465 | IRF6      | 6121  | 95.37  |
| 1 | 210856555 | 211307457 | KCNH1     | 6250  | 99.88  |
| 1 | 213031597 | 213072705 | FLVCR1    | 24682 | 98.14  |
| 1 | 214522039 | 214725792 | PTPN14    | 9647  | 99.76  |
| 1 | 218519577 | 218617961 | TGFB2     | 11768 | 99.92  |
| 1 | 220321635 | 220445796 | RAB3GAP2  | 17168 | 94.32  |
| 1 | 224572845 | 224624735 | WDR26     | 21208 | 97.03  |
| 1 | 225589204 | 225616627 | LBR       | 6518  | 95.13  |
| 1 | 226107578 | 226111978 | PYCR2     | 30262 | 98.96  |
| 1 | 227085237 | 227175246 | COQ8A     | 16812 | 100.00 |
| 1 | 228337553 | 228347527 | GJC2      | 17494 | 90.38  |
| 1 | 228337553 | 228347527 | GJC2      | 17494 | 90.38  |
| 1 | 228337553 | 228347527 | GJC2      | 17494 | 90.38  |
| 1 | 229566992 | 229569845 | ACTA1     | 129   | 98.85  |
| 1 | 231376953 | 231413719 | GNPAT     | 4416  | 96.57  |
| 1 | 235530675 | 235612283 | TBCE      | 11582 | 100.00 |
| 1 | 235530675 | 235612283 | TBCE      | 11582 | 100.00 |
| 1 | 235530675 | 235612283 | TBCE      | 11582 | 100.00 |
| 1 | 235613238 | 235667781 | B3GALNT2  | 28596 | 97.67  |
| 1 | 235824341 | 236046940 | LYST      | 1968  | 98.17  |
| 1 | 236958610 | 237067281 | MTR       | 7468  | 100.00 |
| 1 | 240177648 | 240638489 | FMN2      | 14074 | 83.92  |
| 1 | 241660903 | 241683061 | FH        | 3700  | 86.30  |
| 1 | 243419320 | 243663394 | SDCCAG8   | 10671 | 100.00 |
| 1 | 243651535 | 244014381 | AKT3      | 393   | 76.74  |
| 1 | 244214585 | 244220778 | ZBTB18    | 13030 | 100.00 |
| 1 | 245014468 | 245027844 | HNRNPU    | 5048  | 99.11  |
| 2 | 1635659   | 1748624   | PXDN      | 14966 | 98.75  |
| 2 | 1792885   | 2335032   | MYT1L     | 7623  | 99.64  |
| 2 | 3383446   | 3488865   | TRAPPC12  | 24284 | 100.00 |
| 2 | 3642426   | 3692048   | COLEC11   | 17213 | 100.00 |
| 2 | 5832799   | 5841516   | SOX11     | 11191 | 100.00 |
| 2 | 8865408   | 8977760   | KIDINS220 | 29508 | 99.87  |
| 2 | 15307032  | 15701454  | NBAS      | 15625 | 100.00 |
| 2 | 16080686  | 16087129  | MYCN      | 7559  | 100.00 |
| 2 | 20110021  | 20189892  | WDR35     | 29250 | 100.00 |
| 2 | 20110021  | 20189892  | WDR35     | 29250 | 100.00 |
| 2 | 20191872  | 20212455  | MATN3     | 6909  | 84.46  |
| 2 | 25455845  | 25565459  | DNMT3A    | 2978  | 96.09  |
| 2 | 25956622  | 26101385  | ASXL2     | 23805 | 100.00 |
| 2 | 26413504  | 26467594  | HADHA     | 4801  | 87.46  |
| 2 | 26624784  | 26679579  | DRC1      | 24245 | 100.00 |

|   |           |           |          |       |            |
|---|-----------|-----------|----------|-------|------------|
| 2 | 27440258  | 27466811  | CAD      | 1424  | 96.91      |
| 2 | 27532360  | 27548547  | MPV17    | 7224  | 100.00     |
| 2 | 27667238  | 27712656  | IFT172   | 30391 | 100.00     |
| 2 | 27667238  | 27712656  | IFT172   | 30391 | 100.00     |
| 2 | 28974506  | 29025806  | PPP1CB   | 9282  | 99.90      |
| 2 | 29283842  | 29297127  | C2orf71  | 34383 | 98.42      |
| 2 | 38294116  | 38337044  | CYP1B1   | 2597  | 100.00     |
| 2 | 39208537  | 39351486  | SOS1     | 11187 | 99.15      |
| 2 | 44113647  | 44223144  | LRPPRC   | 15714 | 100.00     |
| 2 | 44543420  | 44589001  | PREPL    | 30228 | 100.00     |
| 2 | 45168902  | 45173216  | SIX3     | 10889 | 99.70      |
| 2 | 47143296  | 47303276  | TTC7A    | 19750 | 98.83      |
| 2 | 55861400  | 55921045  | PNPT1    | 23166 | 94.59      |
| 2 | 55861400  | 55921045  | PNPT1    | 23166 | 94.59      |
| 2 | 58386378  | 58468507  | FANCL    | 20748 | 100.00     |
| 2 | 58386378  | 58468507  | FANCL    | 20748 | 100.00     |
| 2 | 60678302  | 60780702  | BCL11A   | 13221 | 100.00     |
| 2 | 61244360  | 61279125  | PEX13    | 8855  | 100.00     |
| 2 | 61244360  | 61279125  | PEX13    | 8855  | 100.00     |
| 2 | 62051989  | 62081278  | FAM161A  | 25808 | 98.79      |
| 2 | 63348518  | 64054977  | WDPCP    | 28027 | 96.21      |
| 2 | 69240310  | 69476459  | ANTXR1   | 21014 | 93.64      |
| 2 | 69622882  | 69664760  | NFU1     | 16287 | 86.77      |
| 2 | 71163012  | 71192536  | ATP6V1B1 | 853   | 100.00     |
| 2 | 71336814  | 71357369  | MCEE     | 16732 | 100.00     |
| 2 | 73114489  | 73119287  | SPR      | 11257 | 100.00     |
| 2 | 73612886  | 73837920  | ALMS1    | 428   | 97.00      |
| 2 | 74056086  | 74100786  | STAMPB   | 16950 | 99.33      |
| 2 | 74362525  | 74375121  | BOLA3    | 24415 | 83.02      |
| 2 | 74688184  | 74692537  | MOGS     | 24862 | 99.72      |
| 2 | 84650647  | 84687169  | SUCLG1   | 11449 | 100.00     |
| 2 | 86066267  | 86116137  | ST3GAL5  | 10872 | 91.57      |
| 2 | 86247339  | 86333278  | POLR1A   | 17264 | 100.00     |
| 2 | 88856259  | 88927094  | EIF2AK3  | 3255  | 83.38      |
| 2 | 99771418  | 99779620  | LIPT1    | 29569 | 100.00     |
| 2 | 100162323 | 100759201 | AFF3     | 6473  | 100.00     |
| 2 | 108602979 | 108630450 | SLC5A7   | 14025 | 100.00     |
| 2 | 110879888 | 110962643 | NPHP1    | 7905  | 100.00     |
| 2 | 110879888 | 110962643 | NPHP1    | 7905  | 100.00     |
| 2 | 110879888 | 110962643 | NPHP1    | 7905  | 100.00     |
| 2 | 113493930 | 113522254 | CKAP2L   | 26877 | 90.89      |
| 2 | 113973574 | 114036527 | PAX8     | 8622  | 99.78      |
| 2 | 121493199 | 121750229 | GLI2     | 4318  | 99.12      |
| 2 | 122288457 | 122288583 | RNU4ATAC | 34016 | No protein |
| 2 | 127805603 | 127864931 | BIN1     | 1052  | 100.00     |
| 2 | 128014866 | 128051752 | ERCC3    | 3435  | 93.13      |
| 2 | 128014866 | 128051752 | ERCC3    | 3435  | 93.13      |
| 2 | 131095814 | 131099922 | CCDC115  | 28178 | 84.71      |
| 2 | 131350339 | 131357123 | CFC1     | 18292 | 69.64      |
| 2 | 135809835 | 135933964 | RAB3GAP1 | 17063 | 100.00     |



|   |           |           |          |       |        |
|---|-----------|-----------|----------|-------|--------|
| 2 | 136664247 | 136743670 | DARS     | 2678  | 100.00 |
| 2 | 145141648 | 145282147 | ZEB2     | 14881 | 100.00 |
| 2 | 148687968 | 148779147 | ORC4     | 8490  | 89.69  |
| 2 | 149632819 | 149883273 | KIF5C    | 6325  | 99.27  |
| 2 | 150426148 | 150444330 | MMADHC   | 25221 | 81.26  |
| 2 | 152341850 | 152591001 | NEB      | 7720  | 82.11  |
| 2 | 158592958 | 158732374 | ACVR1    | 171   | 100.00 |
| 2 | 162272605 | 162282381 | TBR1     | 11590 | 100.00 |
| 2 | 163123589 | 163175213 | IFIH1    | 18873 | 96.13  |
| 2 | 163123589 | 163175213 | IFIH1    | 18873 | 96.13  |
| 2 | 165944032 | 166060577 | SCN3A    | 10590 | 99.65  |
| 2 | 166095912 | 166248818 | SCN2A    | 10588 | 95.41  |
| 2 | 166095912 | 166248818 | SCN2A    | 10588 | 95.41  |
| 2 | 166095912 | 166248818 | SCN2A    | 10588 | 95.41  |
| 2 | 166845670 | 166984523 | SCN1A    | 10585 | 99.22  |
| 2 | 169779448 | 169887832 | ABCB11   | 42    | 98.59  |
| 2 | 169983619 | 170219195 | LRP2     | 6694  | 100.00 |
| 2 | 170335688 | 170382432 | BBS5     | 970   | 94.05  |
| 2 | 175612320 | 175629200 | CHRNA1   | 1955  | 100.00 |
| 2 | 176957619 | 176960666 | HOXD13   | 5136  | 100.00 |
| 2 | 176957619 | 176960666 | HOXD13   | 5136  | 100.00 |
| 2 | 176957619 | 176960666 | HOXD13   | 5136  | 100.00 |
| 2 | 176957619 | 176960666 | HOXD13   | 5136  | 100.00 |
| 2 | 176957619 | 176960666 | HOXD13   | 5136  | 100.00 |
| 2 | 176957619 | 176960666 | HOXD13   | 5136  | 100.00 |
| 2 | 178257372 | 178408564 | AGPS     | 327   | 100.00 |
| 2 | 191054461 | 191208919 | HIBCH    | 4908  | 78.21  |
| 2 | 191829084 | 191885686 | STAT1    | 11362 | 96.40  |
| 2 | 191829084 | 191885686 | STAT1    | 11362 | 96.40  |
| 2 | 191829084 | 191885686 | STAT1    | 11362 | 96.40  |
| 2 | 197059094 | 197458416 | HECW2    | 29853 | 100.00 |
| 2 | 198351305 | 198381461 | HSPD1    | 5261  | 89.98  |
| 2 | 200134223 | 200335989 | SATB2    | 21637 | 98.90  |
| 2 | 200134223 | 200335989 | SATB2    | 21637 | 98.90  |
| 2 | 200134223 | 200335989 | SATB2    | 21637 | 98.90  |
| 2 | 202484907 | 202508293 | TMEM237  | 14432 | 100.00 |
| 2 | 202565277 | 202645912 | ALS2     | 443   | 100.00 |
| 2 | 206979541 | 207024327 | NDUFS1   | 7707  | 100.00 |
| 2 | 206979541 | 207024327 | NDUFS1   | 7707  | 100.00 |
| 2 | 208627310 | 208634287 | FZD5     | 4043  | 100.00 |
| 2 | 208986331 | 208989225 | CRYGD    | 2411  | 100.00 |
| 2 | 208986331 | 208989225 | CRYGD    | 2411  | 100.00 |
| 2 | 208992861 | 208994554 | CRYGC    | 2410  | 98.48  |
| 2 | 210636717 | 210864024 | UNC80    | 26582 | 100.00 |
| 2 | 211342406 | 211543831 | CPS1     | 2323  | 100.00 |
| 2 | 216176540 | 216214487 | ATIC     | 794   | 98.93  |
| 2 | 216225163 | 216300895 | FN1      | 3778  | 97.76  |
| 2 | 217277137 | 217347776 | SMARCAL1 | 11102 | 99.40  |
| 2 | 219523487 | 219528166 | BCS1L    | 1020  | 100.00 |
| 2 | 219919142 | 219925189 | IHH      | 5956  | 100.00 |

|   |           |           |         |       |        |
|---|-----------|-----------|---------|-------|--------|
| 2 | 219919142 | 219925189 | IHH     | 5956  | 100.00 |
| 2 | 220299568 | 220363009 | SPEG    | 16901 | 100.00 |
| 2 | 220363589 | 220371710 | GMPPA   | 22923 | 100.00 |
| 2 | 220415451 | 220436581 | OBSL1   | 29092 | 99.12  |
| 2 | 223064607 | 223163715 | PAX3    | 8617  | 100.00 |
| 2 | 223064607 | 223163715 | PAX3    | 8617  | 100.00 |
| 2 | 227867427 | 228028829 | COL4A4  | 2206  | 99.67  |
| 2 | 228029281 | 228179508 | COL4A3  | 2204  | 100.00 |
| 2 | 228029281 | 228179508 | COL4A3  | 2204  | 100.00 |
| 2 | 228549926 | 228582728 | SLC19A3 | 16266 | 100.00 |
| 2 | 230628554 | 230787955 | TRIP12  | 12306 | 100.00 |
| 2 | 232063260 | 232239548 | ARMC9   | 20730 | 99.41  |
| 2 | 232825955 | 233209060 | DIS3L2  | 28648 | 100.00 |
| 2 | 233344537 | 233352538 | ECEL1   | 3147  | 100.00 |
| 2 | 233385173 | 233390422 | PRSS56  | 39433 | 91.07  |
| 2 | 233404437 | 233411113 | CHRNA3  | 1967  | 100.00 |
| 2 | 234526291 | 234681956 | UGT1A1  | 12530 | 100.00 |
| 2 | 238232646 | 238323018 | COL6A3  | 2213  | 99.91  |
| 2 | 238232646 | 238323018 | COL6A3  | 2213  | 99.91  |
| 2 | 239756673 | 239795893 | TWIST2  | 20670 | 100.00 |
| 2 | 239756673 | 239795893 | TWIST2  | 20670 | 100.00 |
| 2 | 239969864 | 240323348 | HDAC4   | 14063 | 99.11  |
| 2 | 240831867 | 240964819 | NDUFA10 | 7684  | 100.00 |
| 2 | 241653181 | 241759725 | KIF1A   | 888   | 100.00 |
| 2 | 241653181 | 241759725 | KIF1A   | 888   | 100.00 |
| 2 | 241653181 | 241759725 | KIF1A   | 888   | 100.00 |
| 2 | 241807896 | 241819919 | AGXT    | 341   | 100.00 |
| 3 | 3742498   | 4508965   | SUMF1   | 20376 | 97.96  |
| 3 | 4535032   | 4889524   | ITPR1   | 6180  | 100.00 |
| 3 | 4535032   | 4889524   | ITPR1   | 6180  | 100.00 |
| 3 | 4535032   | 4889524   | ITPR1   | 6180  | 100.00 |
| 3 | 4535032   | 4889524   | ITPR1   | 6180  | 100.00 |
| 3 | 9439299   | 9520924   | SETD5   | 25566 | 99.31  |
| 3 | 9773413   | 9789702   | BRPF1   | 14255 | 100.00 |
| 3 | 9932238   | 9936033   | JAGN1   | 26926 | 100.00 |
| 3 | 9975506   | 9987097   | CRELD1  | 14630 | 100.00 |
| 3 | 10068098  | 10143614  | FANCD2  | 3585  | 100.00 |
| 3 | 11034410  | 11080933  | SLC6A1  | 11042 | 100.00 |
| 3 | 12525931  | 12581122  | TSEN2   | 28422 | 99.64  |
| 3 | 12625100  | 12705725  | RAF1    | 9829  | 100.00 |
| 3 | 13857755  | 13921618  | WNT7A   | 12786 | 100.00 |
| 3 | 13857755  | 13921618  | WNT7A   | 12786 | 100.00 |
| 3 | 14186647  | 14220283  | XPC     | 12816 | 99.89  |
| 3 | 15642848  | 15687329  | BTD     | 1122  | 100.00 |
| 3 | 25215823  | 25639423  | RARB    | 9865  | 100.00 |
| 3 | 25215823  | 25639423  | RARB    | 9865  | 100.00 |
| 3 | 25760435  | 25831530  | NGLY1   | 17646 | 100.00 |
| 3 | 30647994  | 30735634  | TGFBR2  | 11773 | 100.00 |
| 3 | 30647994  | 30735634  | TGFBR2  | 11773 | 100.00 |
| 3 | 33038100  | 33138722  | GLB1    | 4298  | 95.92  |

|   |          |          |          |       |        |
|---|----------|----------|----------|-------|--------|
| 3 | 33038100 | 33138722 | GLB1     | 4298  | 95.92  |
| 3 | 33038100 | 33138722 | GLB1     | 4298  | 95.92  |
| 3 | 33038100 | 33138722 | GLB1     | 4298  | 95.92  |
| 3 | 38887260 | 38992052 | SCN11A   | 10583 | 95.86  |
| 3 | 39424839 | 39438842 | SLC25A38 | 26054 | 95.89  |
| 3 | 41236328 | 41301587 | CTNNB1   | 2514  | 100.00 |
| 3 | 42727011 | 42734036 | KLHL40   | 30372 | 100.00 |
| 3 | 43120724 | 43147568 | POMGNT2  | 25902 | 100.00 |
| 3 | 43731605 | 43775863 | ABHD5    | 21396 | 100.00 |
| 3 | 45429998 | 45590913 | LARS2    | 17095 | 100.00 |
| 3 | 45959396 | 46037316 | FYCO1    | 14673 | 97.32  |
| 3 | 46919236 | 46945287 | PTH1R    | 9608  | 100.00 |
| 3 | 46919236 | 46945287 | PTH1R    | 9608  | 100.00 |
| 3 | 46919236 | 46945287 | PTH1R    | 9608  | 100.00 |
| 3 | 46919236 | 46945287 | PTH1R    | 9608  | 100.00 |
| 3 | 47844399 | 47891685 | DHX30    | 16716 | 100.00 |
| 3 | 48506445 | 48509044 | TREX1    | 12269 | 100.00 |
| 3 | 48894369 | 48936426 | SLC25A20 | 1421  | 100.00 |
| 3 | 49067140 | 49131796 | QRICH1   | 24713 | 98.88  |
| 3 | 49133365 | 49142553 | QARS     | 9751  | 100.00 |
| 3 | 49454211 | 49460186 | AMT      | 473   | 100.00 |
| 3 | 49506146 | 49573048 | DAG1     | 2666  | 99.93  |
| 3 | 49754277 | 49761384 | GMPPB    | 22932 | 100.00 |
| 3 | 49866034 | 49894007 | TRAIP    | 30764 | 100.00 |
| 3 | 50337320 | 50349812 | HYAL1    | 5320  | 100.00 |
| 3 | 50378541 | 50384283 | ZMYND10  | 19412 | 100.00 |
| 3 | 52009066 | 52023213 | ACY1     | 177   | 97.23  |
| 3 | 52109269 | 52188706 | POC1A    | 24488 | 100.00 |
| 3 | 52109269 | 52188706 | POC1A    | 24488 | 100.00 |
| 3 | 53122499 | 53164478 | RFT1     | 30220 | 100.00 |
| 3 | 53258723 | 53290068 | TKT      | 11834 | 96.47  |
| 3 | 53528683 | 53847760 | CACNA1D  | 1391  | 100.00 |
| 3 | 53528683 | 53847760 | CACNA1D  | 1391  | 100.00 |
| 3 | 55499743 | 55523973 | WNT5A    | 12784 | 100.00 |
| 3 | 57231944 | 57260549 | HESX1    | 4877  | 95.34  |
| 3 | 57231944 | 57260549 | HESX1    | 4877  | 95.34  |
| 3 | 57994127 | 58157982 | FLNB     | 3755  | 99.10  |
| 3 | 57994127 | 58157982 | FLNB     | 3755  | 99.10  |
| 3 | 57994127 | 58157982 | FLNB     | 3755  | 99.10  |
| 3 | 57994127 | 58157982 | FLNB     | 3755  | 99.10  |
| 3 | 57994127 | 58157982 | FLNB     | 3755  | 99.10  |
| 3 | 57994127 | 58157982 | FLNB     | 3755  | 99.10  |
| 3 | 66119285 | 66438540 | SLC25A26 | 20661 | 94.55  |
| 3 | 69024365 | 69063112 | EOGT     | 28526 | 100.00 |
| 3 | 69788586 | 70017488 | MITF     | 7105  | 100.00 |
| 3 | 69788586 | 70017488 | MITF     | 7105  | 100.00 |
| 3 | 69788586 | 70017488 | MITF     | 7105  | 100.00 |
| 3 | 69788586 | 70017488 | MITF     | 7105  | 100.00 |
| 3 | 71003844 | 71633140 | FOXP1    | 3823  | 100.00 |
| 3 | 87308554 | 87325737 | POU1F1   | 9210  | 96.65  |
| 3 | 97483365 | 97519953 | ARL6     | 13210 | 100.00 |

|   |           |           |          |       |        |
|---|-----------|-----------|----------|-------|--------|
| 3 | 97483365  | 97519953  | ARL6     | 13210 | 100.00 |
| 3 | 99979844  | 100044095 | TBC1D23  | 25622 | 96.82  |
| 3 | 101280706 | 101285290 | TRMT10C  | 26022 | 100.00 |
| 3 | 111011566 | 111384597 | CD96     | 16892 | 100.00 |
| 3 | 114056941 | 114866118 | ZBTB20   | 13503 | 100.00 |
| 3 | 119013220 | 119139561 | ARHGAP31 | 29216 | 93.65  |
| 3 | 122044091 | 122060819 | CSTA     | 2481  | 100.00 |
| 3 | 123328896 | 123603178 | MYLK     | 7590  | 99.80  |
| 3 | 124449213 | 124464040 | UMPS     | 12563 | 99.38  |
| 3 | 126200124 | 126236616 | UROC1    | 26444 | 100.00 |
| 3 | 128198270 | 128212028 | GATA2    | 4171  | 99.03  |
| 3 | 128598439 | 128634910 | ACAD9    | 21497 | 100.00 |
| 3 | 129158968 | 129239198 | IFT122   | 13556 | 99.12  |
| 3 | 132276986 | 132441303 | NPHP3    | 7907  | 90.32  |
| 3 | 132276986 | 132441303 | NPHP3    | 7907  | 90.32  |
| 3 | 132276986 | 132441303 | NPHP3    | 7907  | 90.32  |
| 3 | 132373290 | 132396941 | UBA5     | 23230 | 84.86  |
| 3 | 133118839 | 133194066 | BFSP2    | 1041  | 96.88  |
| 3 | 134204585 | 134293859 | CEP63    | 25815 | 99.58  |
| 3 | 135969148 | 136056738 | PCCB     | 8654  | 100.00 |
| 3 | 136055077 | 136471220 | STAG1    | 11354 | 91.56  |
| 3 | 138663066 | 138665982 | FOXL2    | 1092  | 100.00 |
| 3 | 138724648 | 139076065 | MRPS22   | 14508 | 98.47  |
| 3 | 142168077 | 142297668 | ATR      | 882   | 98.56  |
| 3 | 145787227 | 145881440 | PLOD2    | 9082  | 95.11  |
| 3 | 147111209 | 147228080 | ZIC1     | 12872 | 100.00 |
| 3 | 155538813 | 155572218 | SLC33A1  | 95    | 100.00 |
| 3 | 158362067 | 158410364 | GFM1     | 13780 | 99.34  |
| 3 | 159974774 | 160117668 | IFT80    | 29262 | 85.44  |
| 3 | 167401086 | 167452727 | PDCD10   | 8761  | 100.00 |
| 3 | 168801287 | 169381406 | MECOM    | 3498  | 100.00 |
| 3 | 170714137 | 170744539 | SLC2A2   | 11006 | 100.00 |
| 3 | 176737143 | 176915261 | TBL1XR1  | 29529 | 78.12  |
| 3 | 178865902 | 178957881 | PIK3CA   | 8975  | 100.00 |
| 3 | 178865902 | 178957881 | PIK3CA   | 8975  | 100.00 |
| 3 | 178865902 | 178957881 | PIK3CA   | 8975  | 100.00 |
| 3 | 180320646 | 180588793 | CCDC39   | 25244 | 94.32  |
| 3 | 181429714 | 181432221 | SOX2     | 11195 | 100.00 |
| 3 | 181429714 | 181432221 | SOX2     | 11195 | 100.00 |
| 3 | 182733006 | 182833863 | MCCC1    | 6936  | 98.48  |
| 3 | 183873176 | 183891398 | DVL3     | 3087  | 100.00 |
| 3 | 183960089 | 183967336 | ALG3     | 23056 | 99.78  |
| 3 | 186935942 | 187009810 | MASP1    | 6901  | 100.00 |
| 3 | 189349205 | 189615068 | TP63     | 15979 | 100.00 |
| 3 | 189349205 | 189615068 | TP63     | 15979 | 100.00 |
| 3 | 189349205 | 189615068 | TP63     | 15979 | 100.00 |
| 3 | 189349205 | 189615068 | TP63     | 15979 | 100.00 |
| 3 | 189349205 | 189615068 | TP63     | 15979 | 100.00 |
| 3 | 189349205 | 189615068 | TP63     | 15979 | 100.00 |
| 3 | 189349205 | 189615068 | TP63     | 15979 | 100.00 |
| 3 | 189349205 | 189615068 | TP63     | 15979 | 100.00 |

|   |           |           |         |       |        |
|---|-----------|-----------|---------|-------|--------|
| 3 | 191857184 | 192485553 | FGF12   | 3668  | 97.81  |
| 3 | 195941093 | 196014828 | PCYT1A  | 8754  | 100.00 |
| 4 | 492989    | 533985    | PIGG    | 25985 | 98.68  |
| 4 | 980785    | 998316    | IDUA    | 5391  | 90.32  |
| 4 | 980785    | 998316    | IDUA    | 5391  | 90.32  |
| 4 | 980785    | 998316    | IDUA    | 5391  | 90.32  |
| 4 | 1341054   | 1381837   | UVSSA   | 29304 | 100.00 |
| 4 | 1795034   | 1810599   | FGFR3   | 3690  | 100.00 |
| 4 | 1795034   | 1810599   | FGFR3   | 3690  | 100.00 |
| 4 | 1795034   | 1810599   | FGFR3   | 3690  | 100.00 |
| 4 | 1795034   | 1810599   | FGFR3   | 3690  | 100.00 |
| 4 | 1795034   | 1810599   | FGFR3   | 3690  | 100.00 |
| 4 | 1795034   | 1810599   | FGFR3   | 3690  | 100.00 |
| 4 | 1795034   | 1810599   | FGFR3   | 3690  | 100.00 |
| 4 | 1795034   | 1810599   | FGFR3   | 3690  | 100.00 |
| 4 | 4861393   | 4865663   | MSX1    | 7391  | 100.00 |
| 4 | 5544499   | 5711275   | EVC2    | 19747 | 94.57  |
| 4 | 5544499   | 5711275   | EVC2    | 19747 | 94.57  |
| 4 | 5712924   | 5830772   | EVC     | 3497  | 98.13  |
| 4 | 5712924   | 5830772   | EVC     | 3497  | 98.13  |
| 4 | 8847802   | 8873543   | HMX1    | 5017  | 72.40  |
| 4 | 13542454  | 13546674  | NKX3-2  | 951   | 96.11  |
| 4 | 15471489  | 15603180  | CC2D2A  | 29253 | 93.25  |
| 4 | 15471489  | 15603180  | CC2D2A  | 29253 | 93.25  |
| 4 | 15471489  | 15603180  | CC2D2A  | 29253 | 93.25  |
| 4 | 16162128  | 16229033  | TAPT1   | 26887 | 100.00 |
| 4 | 17461884  | 17513857  | QDPR    | 9752  | 100.00 |
| 4 | 26165077  | 26436541  | RBPJ    | 5724  | 83.50  |
| 4 | 39184024  | 39287430  | WDR19   | 18340 | 98.71  |
| 4 | 39184024  | 39287430  | WDR19   | 18340 | 98.71  |
| 4 | 39460620  | 39479273  | LIAS    | 16429 | 97.67  |
| 4 | 41746099  | 41750987  | PHOX2B  | 9143  | 100.00 |
| 4 | 41746099  | 41750987  | PHOX2B  | 9143  | 100.00 |
| 4 | 55524085  | 55606881  | KIT     | 6342  | 99.78  |
| 4 | 56212276  | 56239263  | SRD5A3  | 25812 | 97.70  |
| 4 | 56262124  | 56319564  | TMEM165 | 30760 | 100.00 |
| 4 | 56815037  | 56899529  | CEP135  | 29086 | 90.30  |
| 4 | 57896939  | 57976551  | IGFBP7  | 5476  | 96.00  |
| 4 | 72053003  | 72437804  | SLC4A4  | 11030 | 99.22  |
| 4 | 76481258  | 76491095  | ODAPH   | 26300 | 100.00 |
| 4 | 77356253  | 77704406  | SHROOM3 | 30422 | 100.00 |
| 4 | 78978724  | 79465423  | FRAS1   | 19185 | 99.48  |
| 4 | 84182689  | 84206067  | COQ2    | 25223 | 99.29  |
| 4 | 88529681  | 88538062  | DSPP    | 3054  | 96.16  |
| 4 | 88529681  | 88538062  | DSPP    | 3054  | 96.16  |
| 4 | 88529681  | 88538062  | DSPP    | 3054  | 96.16  |
| 4 | 88571459  | 88585513  | DMP1    | 2932  | 100.00 |
| 4 | 89442724  | 89442940  | PIGY    | 28213 | 100.00 |
| 4 | 95679119  | 96079599  | BMPR1B  | 1077  | 100.00 |
| 4 | 101944566 | 102269435 | PPP3CA  | 9314  | 96.46  |

|   |           |           |          |       |        |
|---|-----------|-----------|----------|-------|--------|
| 4 | 103172198 | 103352415 | SLC39A8  | 20862 | 100.00 |
| 4 | 103552660 | 103682151 | MANBA    | 6831  | 98.45  |
| 4 | 103790135 | 103810399 | CISD2    | 24212 | 77.94  |
| 4 | 104507188 | 104640973 | TACR3    | 11528 | 99.00  |
| 4 | 106290234 | 106395238 | PPA2     | 28883 | 90.25  |
| 4 | 106962756 | 107242652 | TBCK     | 28261 | 96.50  |
| 4 | 107236701 | 107270383 | AIMP1    | 10648 | 95.45  |
| 4 | 108852525 | 108874613 | CYP2U1   | 20582 | 96.15  |
| 4 | 108910870 | 108956331 | HADH     | 4799  | 100.00 |
| 4 | 109731877 | 110223813 | COL25A1  | 18603 | 97.25  |
| 4 | 110769358 | 110793471 | LRIT3    | 24783 | 91.91  |
| 4 | 111538579 | 111563279 | PITX2    | 9005  | 95.90  |
| 4 | 111538579 | 111563279 | PITX2    | 9005  | 95.90  |
| 4 | 111538579 | 111563279 | PITX2    | 9005  | 95.90  |
| 4 | 111538579 | 111563279 | PITX2    | 9005  | 95.90  |
| 4 | 113558120 | 113578748 | LARP7    | 24912 | 72.26  |
| 4 | 119201193 | 119274158 | PRSS12   | 9477  | 99.23  |
| 4 | 119643978 | 119759838 | SEC24D   | 10706 | 99.13  |
| 4 | 122745595 | 122791652 | BBS7     | 18758 | 95.53  |
| 4 | 123073488 | 123283913 | KIAA1109 | 26953 | 98.56  |
| 4 | 123653857 | 123666098 | BBS12    | 26648 | 100.00 |
| 4 | 123844229 | 124240605 | SPATA5   | 18119 | 100.00 |
| 4 | 126237554 | 126414087 | FAT4     | 23109 | 100.00 |
| 4 | 128802016 | 128820350 | PLK4     | 11397 | 97.08  |
| 4 | 128838960 | 128887150 | MFSD8    | 28486 | 100.00 |
| 4 | 140222609 | 140341187 | NAA15    | 30782 | 99.48  |
| 4 | 146539415 | 146581187 | MMAA     | 18871 | 100.00 |
| 4 | 148402069 | 148466106 | EDNRA    | 3179  | 100.00 |
| 4 | 151185594 | 151936879 | LRBA     | 1742  | 100.00 |
| 4 | 151503077 | 151505843 | MAB21L2  | 6758  | 100.00 |
| 4 | 151503077 | 151505843 | MAB21L2  | 6758  | 100.00 |
| 4 | 155548097 | 155674270 | LRAT     | 6685  | 100.00 |
| 4 | 159593277 | 159630775 | ETFDH    | 3483  | 100.00 |
| 4 | 170314426 | 170533780 | NEK1     | 7744  | 100.00 |
| 4 | 170314426 | 170533780 | NEK1     | 7744  | 100.00 |
| 4 | 175411328 | 175444305 | HPGD     | 5154  | 100.00 |
| 4 | 178351924 | 178363657 | AGA      | 318   | 100.00 |
| 4 | 184580420 | 184634745 | TRAPPC11 | 25751 | 100.00 |
| 4 | 186064395 | 186071536 | SLC25A4  | 10990 | 100.00 |
| 5 | 218356    | 256815    | SDHA     | 10680 | 73.73  |
| 5 | 892758    | 919472    | TRIP13   | 12307 | 100.00 |
| 5 | 1253262   | 1295184   | TERT     | 11730 | 92.84  |
| 5 | 1392909   | 1445545   | SLC6A3   | 11049 | 100.00 |
| 5 | 6599352   | 6633404   | NSUN2    | 25994 | 98.20  |
| 5 | 7851299   | 7906138   | MTRR     | 7473  | 100.00 |
| 5 | 13690440  | 13944652  | DNAH5    | 2950  | 100.00 |
| 5 | 14143811  | 14532235  | TRIO     | 12303 | 98.07  |
| 5 | 14664773  | 14699820  | OTULIN   | 25118 | 96.51  |
| 5 | 14704910  | 14871887  | ANKH     | 15492 | 100.00 |
| 5 | 14704910  | 14871887  | ANKH     | 15492 | 100.00 |

|   |           |           |          |       |        |
|---|-----------|-----------|----------|-------|--------|
| 5 | 16473147  | 16617167  | RETREG1  | 25964 | 96.10  |
| 5 | 36876861  | 37066515  | NIPBL    | 28862 | 99.48  |
| 5 | 37106330  | 37249530  | C5orf42  | 25801 | 95.18  |
| 5 | 41730167  | 41870621  | OXCT1    | 8527  | 99.06  |
| 5 | 42423879  | 42721979  | GHR      | 4263  | 100.00 |
| 5 | 44303646  | 44389808  | FGF10    | 3666  | 100.00 |
| 5 | 45259349  | 45696253  | HCN1     | 4845  | 99.81  |
| 5 | 52391509  | 52405893  | MOCS2    | 7193  | 100.00 |
| 5 | 52856463  | 52979168  | NDUFS4   | 7711  | 100.00 |
| 5 | 52856463  | 52979168  | NDUFS4   | 7711  | 100.00 |
| 5 | 52856463  | 52979168  | NDUFS4   | 7711  | 100.00 |
| 5 | 54526980  | 54529508  | CCNO     | 18576 | 98.86  |
| 5 | 56111401  | 56191979  | MAP3K1   | 6848  | 100.00 |
| 5 | 58264865  | 59817947  | PDE4D    | 8783  | 99.47  |
| 5 | 60169658  | 60240900  | ERCC8    | 3439  | 92.95  |
| 5 | 60240956  | 60448853  | NDUFAF2  | 28086 | 79.41  |
| 5 | 60628100  | 60841997  | ZSWIM6   | 29316 | 96.76  |
| 5 | 61601989  | 61833076  | KIF2A    | 6318  | 100.00 |
| 5 | 64064757  | 64314590  | CWC27    | 10664 | 99.18  |
| 5 | 67511548  | 67597649  | PIK3R1   | 8979  | 97.07  |
| 5 | 67511548  | 67597649  | PIK3R1   | 8979  | 97.07  |
| 5 | 70883115  | 70954531  | MCCC2    | 6937  | 99.70  |
| 5 | 73935848  | 74018472  | HEXB     | 4879  | 99.48  |
| 5 | 74664311  | 74807963  | COL4A3BP | 2205  | 91.88  |
| 5 | 78073032  | 78281910  | ARSB     | 714   | 100.00 |
| 5 | 79922047  | 79950802  | DHFR     | 2861  | 79.96  |
| 5 | 81569177  | 81574396  | RPS23    | 10410 | 73.84  |
| 5 | 82373317  | 82649606  | XRCC4    | 12831 | 100.00 |
| 5 | 86563705  | 86687748  | RASA1    | 9871  | 96.55  |
| 5 | 86563705  | 86687748  | RASA1    | 9871  | 96.55  |
| 5 | 88013975  | 88199922  | MEF2C    | 6996  | 100.00 |
| 5 | 92919043  | 92930321  | NR2F1    | 7975  | 100.00 |
| 5 | 94799599  | 94890711  | TTC37    | 23639 | 100.00 |
| 5 | 118788138 | 118972894 | HSD17B4  | 5213  | 98.79  |
| 5 | 118788138 | 118972894 | HSD17B4  | 5213  | 98.79  |
| 5 | 125877533 | 125931110 | ALDH7A1  | 877   | 89.21  |
| 5 | 126626523 | 126801429 | MEGF10   | 29634 | 100.00 |
| 5 | 127593601 | 127994878 | FBN2     | 3604  | 99.63  |
| 5 | 130494720 | 130507428 | HINT1    | 4912  | 72.18  |
| 5 | 131705444 | 131731306 | SLC22A5  | 10969 | 100.00 |
| 5 | 132202252 | 132203723 | UQCRCQ   | 29594 | 100.00 |
| 5 | 132211071 | 132299326 | AFF4     | 17869 | 100.00 |
| 5 | 134363425 | 134370503 | PITX1    | 9004  | 94.81  |
| 5 | 134363425 | 134370503 | PITX1    | 9004  | 94.81  |
| 5 | 138282409 | 138629246 | SIL1     | 24624 | 95.82  |
| 5 | 139487362 | 139496321 | PURA     | 9701  | 100.00 |
| 5 | 149340300 | 149373018 | SLC26A2  | 10994 | 100.00 |
| 5 | 149340300 | 149373018 | SLC26A2  | 10994 | 100.00 |
| 5 | 149340300 | 149373018 | SLC26A2  | 10994 | 100.00 |
| 5 | 149340300 | 149373018 | SLC26A2  | 10994 | 100.00 |

|   |           |           |          |       |        |
|---|-----------|-----------|----------|-------|--------|
| 5 | 149493400 | 149535435 | PDGFRB   | 8804  | 96.63  |
| 5 | 149493400 | 149535435 | PDGFRB   | 8804  | 96.63  |
| 5 | 149599054 | 149669854 | CAMK2A   | 1460  | 100.00 |
| 5 | 149737202 | 149779871 | TCOF1    | 11654 | 97.80  |
| 5 | 150591711 | 150650001 | GM2A     | 4367  | 100.00 |
| 5 | 151040657 | 151066726 | SPARC    | 11219 | 100.00 |
| 5 | 160715436 | 160976050 | GABRB2   | 4082  | 100.00 |
| 5 | 161274197 | 161326975 | GABRA1   | 4075  | 100.00 |
| 5 | 161274197 | 161326975 | GABRA1   | 4075  | 100.00 |
| 5 | 161494546 | 161582542 | GABRG2   | 4087  | 92.25  |
| 5 | 161494546 | 161582542 | GABRG2   | 4087  | 92.25  |
| 5 | 171752185 | 171881527 | SH3PXD2B | 29242 | 100.00 |
| 5 | 172659112 | 172662360 | NKX2-5   | 2488  | 100.00 |
| 5 | 172659112 | 172662360 | NKX2-5   | 2488  | 100.00 |
| 5 | 172659112 | 172662360 | NKX2-5   | 2488  | 100.00 |
| 5 | 174151536 | 174157896 | MSX2     | 7392  | 100.00 |
| 5 | 174151536 | 174157896 | MSX2     | 7392  | 100.00 |
| 5 | 176560026 | 176727216 | NSD1     | 14234 | 99.95  |
| 5 | 176560026 | 176727216 | NSD1     | 14234 | 99.95  |
| 5 | 176560026 | 176727216 | NSD1     | 14234 | 99.95  |
| 5 | 177027101 | 177037348 | B4GALT7  | 930   | 97.26  |
| 5 | 177419236 | 177423243 | PROP1    | 9455  | 91.78  |
| 5 | 177576461 | 177580968 | NHP2     | 14377 | 97.19  |
| 5 | 178405328 | 178423207 | GRM6     | 4598  | 85.48  |
| 5 | 180028506 | 180076624 | FLT4     | 3767  | 100.00 |
| 6 | 1610681   | 1614127   | FOXC1    | 3800  | 98.92  |
| 6 | 1610681   | 1614127   | FOXC1    | 3800  | 98.92  |
| 6 | 1610681   | 1614127   | FOXC1    | 3800  | 98.92  |
| 6 | 3153903   | 3157760   | TUBB2A   | 12412 | 99.48  |
| 6 | 3224495   | 3231964   | TUBB2B   | 30829 | 100.00 |
| 6 | 10393419  | 10419892  | TFAP2A   | 11742 | 99.77  |
| 6 | 12290596  | 12297427  | EDN1     | 3176  | 100.00 |
| 6 | 12290596  | 12297427  | EDN1     | 3176  | 100.00 |
| 6 | 24171984  | 24358280  | DCDC2    | 18141 | 100.00 |
| 6 | 24495080  | 24537435  | ALDH5A1  | 408   | 100.00 |
| 6 | 24775159  | 24786327  | GMNN     | 17493 | 100.00 |
| 6 | 26104104  | 26104518  | HIST1H4C | 4787  | 100.00 |
| 6 | 26156559  | 26157343  | HIST1H1E | 4718  | 100.00 |
| 6 | 29640169  | 29648887  | ZFP57    | 18791 | 99.81  |
| 6 | 30687978  | 30693203  | TUBB     | 20778 | 93.93  |
| 6 | 30687978  | 30693203  | TUBB     | 20778 | 93.93  |
| 6 | 31825436  | 31830683  | NEU1     | 7758  | 96.15  |
| 6 | 31926857  | 31937532  | SKIV2L   | 10898 | 100.00 |
| 6 | 32808494  | 32812480  | PSMB8    | 9545  | 97.35  |
| 6 | 33130458  | 33160276  | COL11A2  | 2187  | 99.29  |
| 6 | 33130458  | 33160276  | COL11A2  | 2187  | 99.29  |
| 6 | 33130458  | 33160276  | COL11A2  | 2187  | 99.29  |
| 6 | 33130458  | 33160276  | COL11A2  | 2187  | 99.29  |
| 6 | 33130458  | 33160276  | COL11A2  | 2187  | 99.29  |
| 6 | 33387847  | 33421466  | SYNGAP1  | 11497 | 97.22  |



|   |           |           |         |       |        |
|---|-----------|-----------|---------|-------|--------|
| 6 | 33387847  | 33421466  | SYNGAP1 | 11497 | 97.22  |
| 6 | 35420138  | 35434880  | FANCE   | 3586  | 88.76  |
| 6 | 36210980  | 36276372  | PNPLA1  | 21246 | 97.26  |
| 6 | 39867354  | 39902290  | MOCS1   | 7190  | 97.58  |
| 6 | 42931608  | 42946958  | PEX6    | 8859  | 86.17  |
| 6 | 42931608  | 42946958  | PEX6    | 8859  | 86.17  |
| 6 | 42952237  | 42980080  | PPP2R5D | 9312  | 100.00 |
| 6 | 43005355  | 43021683  | CUL7    | 21024 | 100.00 |
| 6 | 43477440  | 43497323  | POLR1C  | 20194 | 95.00  |
| 6 | 45295894  | 45632086  | RUNX2   | 10472 | 100.00 |
| 6 | 49398073  | 49430904  | MUT     | 7526  | 100.00 |
| 6 | 50786436  | 50815326  | TFAP2B  | 11743 | 96.02  |
| 6 | 51480098  | 51952423  | PKHD1   | 9016  | 100.00 |
| 6 | 57053607  | 57087078  | RAB23   | 14263 | 100.00 |
| 6 | 70385694  | 70507003  | LMBRD1  | 23038 | 80.94  |
| 6 | 70924764  | 71012786  | COL9A1  | 2217  | 99.38  |
| 6 | 70924764  | 71012786  | COL9A1  | 2217  | 99.38  |
| 6 | 73331520  | 73908574  | KCNQ5   | 6299  | 100.00 |
| 6 | 73331520  | 73908574  | KCNQ5   | 6299  | 100.00 |
| 6 | 74171301  | 74218959  | MTO1    | 19261 | 78.07  |
| 6 | 74303102  | 74363878  | SLC17A5 | 10933 | 100.00 |
| 6 | 74303102  | 74363878  | SLC17A5 | 10933 | 100.00 |
| 6 | 80624529  | 80657297  | ELOVL4  | 14415 | 99.37  |
| 6 | 80816364  | 81055987  | BCKDHB  | 987   | 91.18  |
| 6 | 83870869  | 83903655  | PGM3    | 8907  | 100.00 |
| 6 | 85397069  | 85474237  | TBX18   | 11595 | 98.68  |
| 6 | 86215214  | 86303874  | SNX14   | 14977 | 97.60  |
| 6 | 88180341  | 88222054  | SLC35A1 | 11021 | 100.00 |
| 6 | 88224096  | 88299721  | RARS2   | 21406 | 100.00 |
| 6 | 91223292  | 91296764  | MAP3K7  | 6859  | 100.00 |
| 6 | 91223292  | 91296764  | MAP3K7  | 6859  | 100.00 |
| 6 | 99316420  | 99395849  | FBXL4   | 13601 | 100.00 |
| 6 | 101846664 | 102517958 | GRIK2   | 4580  | 100.00 |
| 6 | 105175968 | 105307794 | HACE1   | 21033 | 100.00 |
| 6 | 107018903 | 107077373 | RTN4IP1 | 18647 | 96.51  |
| 6 | 107473761 | 107780768 | PDSS2   | 23041 | 99.17  |
| 6 | 110012499 | 110146631 | FIG4    | 16873 | 100.00 |
| 6 | 110012499 | 110146631 | FIG4    | 16873 | 100.00 |
| 6 | 116440086 | 116479910 | COL10A1 | 2185  | 100.00 |
| 6 | 117198375 | 117253326 | RFX6    | 21478 | 97.70  |
| 6 | 117996665 | 118031803 | NUS1    | 21042 | 45.35  |
| 6 | 121756838 | 121770873 | GJA1    | 4274  | 100.00 |
| 6 | 121756838 | 121770873 | GJA1    | 4274  | 100.00 |
| 6 | 121756838 | 121770873 | GJA1    | 4274  | 100.00 |
| 6 | 121756838 | 121770873 | GJA1    | 4274  | 100.00 |
| 6 | 129204342 | 129837714 | LAMA2   | 6482  | 100.00 |
| 6 | 131894284 | 131905472 | ARG1    | 663   | 100.00 |
| 6 | 132129156 | 132216295 | ENPP1   | 3356  | 90.71  |
| 6 | 132129156 | 132216295 | ENPP1   | 3356  | 90.71  |
| 6 | 135604670 | 135818914 | AHI1    | 21575 | 97.22  |

|   |           |           |         |       |        |
|---|-----------|-----------|---------|-------|--------|
| 6 | 137143717 | 137235075 | PEX7    | 8860  | 99.08  |
| 6 | 137143717 | 137235075 | PEX7    | 8860  | 99.08  |
| 6 | 137143717 | 137235075 | PEX7    | 8860  | 99.08  |
| 6 | 142622991 | 142767403 | ADGRG6  | 13841 | 100.00 |
| 6 | 143072604 | 143266338 | HIVEP2  | 4921  | 100.00 |
| 6 | 143771944 | 143811147 | PEX3    | 8858  | 100.00 |
| 6 | 143771944 | 143811147 | PEX3    | 8858  | 100.00 |
| 6 | 146348782 | 146758734 | GRM1    | 4593  | 99.08  |
| 6 | 149539777 | 149732749 | TAB2    | 17075 | 99.81  |
| 6 | 151725989 | 151773259 | RMND1   | 21176 | 100.00 |
| 6 | 152442819 | 152958936 | SYNE1   | 17089 | 100.00 |
| 6 | 152442819 | 152958936 | SYNE1   | 17089 | 100.00 |
| 6 | 157099063 | 157531913 | ARID1B  | 18040 | 100.00 |
| 6 | 157099063 | 157531913 | ARID1B  | 18040 | 100.00 |
| 6 | 158589384 | 158620376 | GTF2H5  | 21157 | 96.76  |
| 6 | 159393903 | 159421219 | RSPH3   | 21054 | 99.35  |
| 6 | 165740776 | 166400091 | PDE10A  | 8772  | 94.66  |
| 6 | 167342992 | 167370679 | RNASET2 | 21686 | 88.46  |
| 6 | 168841831 | 169073984 | SMOC2   | 20323 | 99.05  |
| 7 | 192969    | 300711    | FAM20C  | 22140 | 100.00 |
| 7 | 766338    | 829190    | DNAAF5  | 26013 | 100.00 |
| 7 | 2552163   | 2568811   | LFNG    | 6560  | 82.98  |
| 7 | 2577511   | 2595361   | BRAT1   | 21701 | 93.49  |
| 7 | 5566782   | 5603415   | ACTB    | 132   | 99.29  |
| 7 | 5566782   | 5603415   | ACTB    | 132   | 99.29  |
| 7 | 6012870   | 6048756   | PMS2    | 9122  | 78.34  |
| 7 | 6414154   | 6443608   | RAC1    | 9801  | 93.40  |
| 7 | 16130817  | 16460947  | ISPD    | 37276 | 94.99  |
| 7 | 19060614  | 19157295  | TWIST1  | 12428 | 100.00 |
| 7 | 19060614  | 19157295  | TWIST1  | 12428 | 100.00 |
| 7 | 22980878  | 23053749  | FAM126A | 24587 | 100.00 |
| 7 | 23145353  | 23217533  | KLHL7   | 15646 | 100.00 |
| 7 | 27132612  | 27135615  | HOXA1   | 5099  | 100.00 |
| 7 | 27132612  | 27135615  | HOXA1   | 5099  | 100.00 |
| 7 | 27233122  | 27239725  | HOXA13  | 5102  | 83.12  |
| 7 | 30050203  | 30066300  | FKBP14  | 18625 | 100.00 |
| 7 | 33053742  | 33102409  | NT5C3A  | 17820 | 67.60  |
| 7 | 33168856  | 33645680  | BBS9    | 30000 | 100.00 |
| 7 | 33944523  | 34195484  | BMPER   | 24154 | 99.27  |
| 7 | 35242042  | 35293758  | TBX20   | 11598 | 100.00 |
| 7 | 39989636  | 40136733  | CDK13   | 1733  | 91.36  |
| 7 | 40165622  | 40174258  | MPLKIP  | 16002 | 100.00 |
| 7 | 42000548  | 42277469  | GLI3    | 4319  | 100.00 |
| 7 | 42000548  | 42277469  | GLI3    | 4319  | 100.00 |
| 7 | 42000548  | 42277469  | GLI3    | 4319  | 100.00 |
| 7 | 42000548  | 42277469  | GLI3    | 4319  | 100.00 |
| 7 | 44256749  | 44374176  | CAMK2B  | 1461  | 100.00 |
| 7 | 47814250  | 47988088  | PKD1L1  | 18053 | 96.74  |
| 7 | 50526134  | 50633154  | DDC     | 2719  | 100.00 |
| 7 | 56078744  | 56119297  | PSPH    | 9577  | 100.00 |

|   |           |           |          |       |        |
|---|-----------|-----------|----------|-------|--------|
| 7 | 56078744  | 56119297  | PSPH     | 9577  | 100.00 |
| 7 | 65425671  | 65447301  | GUSB     | 4696  | 99.24  |
| 7 | 65540785  | 65558545  | ASL      | 746   | 100.00 |
| 7 | 66093868  | 66276446  | KCTD7    | 21957 | 88.60  |
| 7 | 66093868  | 66276446  | KCTD7    | 21957 | 88.60  |
| 7 | 66452664  | 66460588  | SBDS     | 19440 | 100.00 |
| 7 | 69063905  | 70258054  | AUTS2    | 14262 | 98.02  |
| 7 | 73442119  | 73484237  | ELN      | 3327  | 99.36  |
| 7 | 73442119  | 73484237  | ELN      | 3327  | 99.36  |
| 7 | 75677369  | 75696826  | MDH2     | 6971  | 100.00 |
| 7 | 75956116  | 75988348  | YWHAG    | 12852 | 100.00 |
| 7 | 79763271  | 79848718  | GNAI1    | 4384  | 88.54  |
| 7 | 91828283  | 91875480  | KRIT1    | 1573  | 100.00 |
| 7 | 92116334  | 92157845  | PEX1     | 8850  | 100.00 |
| 7 | 92116334  | 92157845  | PEX1     | 8850  | 100.00 |
| 7 | 92116334  | 92157845  | PEX1     | 8850  | 100.00 |
| 7 | 99699172  | 99707968  | AP4M1    | 574   | 97.80  |
| 7 | 103112231 | 103629963 | RELN     | 9957  | 99.51  |
| 7 | 106842000 | 107204959 | COG5     | 14857 | 98.11  |
| 7 | 107531415 | 107572175 | DLD      | 2898  | 100.00 |
| 7 | 107531415 | 107572175 | DLD      | 2898  | 100.00 |
| 7 | 107564244 | 107643700 | LAMB1    | 6486  | 99.67  |
| 7 | 113726382 | 114333827 | FOXP2    | 13875 | 98.63  |
| 7 | 121715701 | 121784334 | AASS     | 17366 | 100.00 |
| 7 | 121941448 | 121950745 | FEZF1    | 22788 | 100.00 |
| 7 | 128828713 | 128853386 | SMO      | 11119 | 94.29  |
| 7 | 130033612 | 130082274 | CEP41    | 12370 | 96.43  |
| 7 | 137687070 | 137802732 | AKR1D1   | 388   | 93.27  |
| 7 | 139476850 | 139720125 | TBXAS1   | 11609 | 100.00 |
| 7 | 140419127 | 140624564 | BRAF     | 1097  | 81.08  |
| 7 | 140419127 | 140624564 | BRAF     | 1097  | 81.08  |
| 7 | 140419127 | 140624564 | BRAF     | 1097  | 81.08  |
| 7 | 141250989 | 141355044 | AGK      | 21869 | 98.19  |
| 7 | 145813453 | 148118090 | CNTNAP2  | 13830 | 100.00 |
| 7 | 148504475 | 148581413 | EZH2     | 3527  | 99.36  |
| 7 | 155592680 | 155604967 | SHH      | 10848 | 100.00 |
| 7 | 155592680 | 155604967 | SHH      | 10848 | 100.00 |
| 7 | 155592680 | 155604967 | SHH      | 10848 | 100.00 |
| 7 | 155592680 | 155604967 | SHH      | 10848 | 100.00 |
| 7 | 156786745 | 156803345 | MNX1     | 4979  | 67.58  |
| 7 | 158649269 | 158749438 | WDR60    | 21862 | 100.00 |
| 7 | 158649269 | 158749438 | WDR60    | 21862 | 100.00 |
| 8 | 1703944   | 1734738   | CLN8     | 2079  | 100.00 |
| 8 | 1703944   | 1734738   | CLN8     | 2079  | 100.00 |
| 8 | 6264113   | 6501144   | MCPH1    | 6954  | 99.62  |
| 8 | 11534468  | 11617511  | GATA4    | 4173  | 79.08  |
| 8 | 15274724  | 15624158  | TUSC3    | 30242 | 100.00 |
| 8 | 17913934  | 17942494  | ASAH1    | 735   | 98.87  |
| 8 | 17913934  | 17942494  | ASAH1    | 735   | 98.87  |
| 8 | 20054878  | 20084330  | ATP6V1B2 | 854   | 98.63  |

|   |           |           |         |       |        |
|---|-----------|-----------|---------|-------|--------|
| 8 | 21971928  | 21990897  | HR      | 5172  | 89.43  |
| 8 | 21971928  | 21990897  | HR      | 5172  | 89.43  |
| 8 | 27629466  | 27670157  | ESCO2   | 27230 | 96.68  |
| 8 | 27629466  | 27670157  | ESCO2   | 27230 | 96.68  |
| 8 | 30435835  | 30515768  | GTF2E2  | 4651  | 100.00 |
| 8 | 33330904  | 33371119  | TTI2    | 26262 | 100.00 |
| 8 | 37620111  | 37637283  | PLPBP   | 9457  | 100.00 |
| 8 | 38001167  | 38008783  | STAR    | 11359 | 100.00 |
| 8 | 38082736  | 38133076  | DDHD2   | 29106 | 100.00 |
| 8 | 38268656  | 38326352  | FGFR1   | 3688  | 100.00 |
| 8 | 38268656  | 38326352  | FGFR1   | 3688  | 100.00 |
| 8 | 38268656  | 38326352  | FGFR1   | 3688  | 100.00 |
| 8 | 38268656  | 38326352  | FGFR1   | 3688  | 100.00 |
| 8 | 38268656  | 38326352  | FGFR1   | 3688  | 100.00 |
| 8 | 38268656  | 38326352  | FGFR1   | 3688  | 100.00 |
| 8 | 41786997  | 41909508  | KAT6A   | 13013 | 100.00 |
| 8 | 42691817  | 42698468  | THAP1   | 20856 | 100.00 |
| 8 | 42995556  | 43057998  | HGSNAT  | 26527 | 93.82  |
| 8 | 55370495  | 55373448  | SOX17   | 18122 | 100.00 |
| 8 | 57870492  | 57906403  | IMPAD1  | 26019 | 100.00 |
| 8 | 61099906  | 61193971  | CA8     | 1382  | 94.39  |
| 8 | 61591337  | 61779465  | CHD7    | 20626 | 97.68  |
| 8 | 61591337  | 61779465  | CHD7    | 20626 | 97.68  |
| 8 | 61591337  | 61779465  | CHD7    | 20626 | 97.68  |
| 8 | 62413116  | 62627155  | ASPH    | 757   | 100.00 |
| 8 | 67974661  | 68108498  | CSPP1   | 26193 | 100.00 |
| 8 | 72109668  | 72274467  | EYA1    | 3519  | 99.47  |
| 8 | 74884672  | 74895018  | TMEM70  | 26050 | 97.83  |
| 8 | 77892494  | 77913280  | PEX2    | 9717  | 100.00 |
| 8 | 77892494  | 77913280  | PEX2    | 9717  | 100.00 |
| 8 | 77892494  | 77913280  | PEX2    | 9717  | 100.00 |
| 8 | 86376081  | 86393722  | CA2     | 1373  | 100.00 |
| 8 | 90945564  | 91015456  | NBN     | 7652  | 96.50  |
| 8 | 92082424  | 92099323  | OTUD6B  | 24281 | 100.00 |
| 8 | 94767072  | 94831462  | TMEM67  | 28396 | 100.00 |
| 8 | 94767072  | 94831462  | TMEM67  | 28396 | 100.00 |
| 8 | 94767072  | 94831462  | TMEM67  | 28396 | 100.00 |
| 8 | 94767072  | 94831462  | TMEM67  | 28396 | 100.00 |
| 8 | 96257147  | 96281429  | C8orf37 | 27232 | 100.00 |
| 8 | 97154562  | 97173020  | GDF6    | 4221  | 100.00 |
| 8 | 97154562  | 97173020  | GDF6    | 4221  | 100.00 |
| 8 | 97238148  | 97247862  | UQCRB   | 12582 | 100.00 |
| 8 | 97273943  | 97349223  | PTDSS1  | 9587  | 100.00 |
| 8 | 100025494 | 100889808 | VPS13B  | 2183  | 99.17  |
| 8 | 101170134 | 101271506 | SPAG1   | 11212 | 96.44  |
| 8 | 102504660 | 102681954 | GRHL2   | 2799  | 100.00 |
| 8 | 103216730 | 103251346 | RRM2B   | 17296 | 100.00 |
| 8 | 104310661 | 104345094 | FZD6    | 4044  | 100.00 |
| 8 | 116420724 | 116821899 | TRPS1   | 12340 | 100.00 |
| 8 | 117858174 | 117887105 | RAD21   | 9811  | 94.20  |

|   |           |           |          |       |            |
|---|-----------|-----------|----------|-------|------------|
| 8 | 118806729 | 119124092 | EXT1     | 3512  | 97.61      |
| 8 | 118806729 | 119124092 | EXT1     | 3512  | 97.61      |
| 8 | 120007691 | 120118821 | COLEC10  | 2220  | 100.00     |
| 8 | 133133108 | 133493200 | KCNQ3    | 6297  | 100.00     |
| 8 | 133584320 | 133687838 | LRRC6    | 16725 | 100.00     |
| 8 | 140742586 | 141468678 | TRAPPC9  | 30832 | 99.19      |
| 8 | 144898514 | 144912029 | PUF60    | 17042 | 96.85      |
| 8 | 145137493 | 145141119 | GPAA1    | 4446  | 96.03      |
| 8 | 145149930 | 145152428 | CYC1     | 2579  | 100.00     |
| 8 | 145736667 | 145743229 | RECQL4   | 9949  | 100.00     |
| 8 | 145736667 | 145743229 | RECQL4   | 9949  | 100.00     |
| 8 | 145736667 | 145743229 | RECQL4   | 9949  | 100.00     |
| 9 | 214854    | 465259    | DOCK8    | 19191 | 100.00     |
| 9 | 2015342   | 2193624   | SMARCA2  | 11098 | 97.42      |
| 9 | 2015342   | 2193624   | SMARCA2  | 11098 | 97.42      |
| 9 | 2621834   | 2660053   | VLDLR    | 12698 | 100.00     |
| 9 | 3824127   | 4348392   | GLIS3    | 28510 | 99.86      |
| 9 | 6532464   | 6645650   | GLDC     | 4313  | 82.24      |
| 9 | 12685439  | 12710290  | TYRP1    | 12450 | 100.00     |
| 9 | 14734664  | 14910993  | FREM1    | 23399 | 98.27      |
| 9 | 26904081  | 26947461  | PLAA     | 9043  | 100.00     |
| 9 | 27109139  | 27230173  | TEK      | 11724 | 100.00     |
| 9 | 32972604  | 33025166  | APTX     | 15984 | 91.35      |
| 9 | 34638130  | 34651032  | GALT     | 4135  | 100.00     |
| 9 | 34650699  | 34661889  | IL11RA   | 5967  | 100.00     |
| 9 | 34650699  | 34661889  | IL11RA   | 5967  | 100.00     |
| 9 | 35073832  | 35080013  | FANCG    | 3588  | 98.17      |
| 9 | 35088685  | 35096591  | PIGO     | 23215 | 100.00     |
| 9 | 35657748  | 35658014  | RMRP     | 10031 | No protein |
| 9 | 35681989  | 35691017  | TPM2     | 12011 | 100.00     |
| 9 | 35736863  | 35749983  | GBA2     | 18986 | 100.00     |
| 9 | 35792151  | 35809729  | NPR2     | 7944  | 99.49      |
| 9 | 37766975  | 37801434  | EXOSC3   | 17944 | 85.27      |
| 9 | 80037995  | 80263223  | GNA14    | 4382  | 100.00     |
| 9 | 80331003  | 80646374  | GNAQ     | 4390  | 70.61      |
| 9 | 80912059  | 80945009  | PSAT1    | 19129 | 65.59      |
| 9 | 80912059  | 80945009  | PSAT1    | 19129 | 65.59      |
| 9 | 87283466  | 87638505  | NTRK2    | 8032  | 100.00     |
| 9 | 91933421  | 91974557  | SECISBP2 | 30972 | 97.52      |
| 9 | 93976097  | 94124195  | AUH      | 890   | 100.00     |
| 9 | 94325373  | 94712444  | ROR2     | 10257 | 99.75      |
| 9 | 94325373  | 94712444  | ROR2     | 10257 | 99.75      |
| 9 | 94325373  | 94712444  | ROR2     | 10257 | 99.75      |
| 9 | 94972489  | 95056038  | IARS     | 5330  | 100.00     |
| 9 | 95473645  | 95527094  | BICD2    | 17208 | 98.68      |
| 9 | 97365415  | 97402531  | FBP1     | 3606  | 100.00     |
| 9 | 97861336  | 98079991  | FANCC    | 3584  | 100.00     |
| 9 | 98205262  | 98279339  | PTCH1    | 9585  | 97.31      |
| 9 | 98205262  | 98279339  | PTCH1    | 9585  | 97.31      |
| 9 | 98637983  | 98776842  | ERCC6L2  | 26922 | 97.26      |

|   |           |           |          |       |        |
|---|-----------|-----------|----------|-------|--------|
| 9 | 100437191 | 100459639 | XPA      | 12814 | 95.99  |
| 9 | 100615536 | 100618986 | FOX1     | 3806  | 100.00 |
| 9 | 100819021 | 100845357 | NANS     | 19237 | 100.00 |
| 9 | 101866320 | 101916474 | TGFBR1   | 11772 | 93.58  |
| 9 | 101866320 | 101916474 | TGFBR1   | 11772 | 93.58  |
| 9 | 101866320 | 101916474 | TGFBR1   | 11772 | 93.58  |
| 9 | 101978708 | 101984238 | ALG2     | 23159 | 100.00 |
| 9 | 104182860 | 104198105 | ALDOB    | 417   | 96.18  |
| 9 | 108320411 | 108403399 | FKTN     | 3622  | 88.31  |
| 9 | 108320411 | 108403399 | FKTN     | 3622  | 88.31  |
| 9 | 108320411 | 108403399 | FKTN     | 3622  | 88.31  |
| 9 | 108320411 | 108403399 | FKTN     | 3622  | 88.31  |
| 9 | 109625378 | 109775915 | ZNF462   | 21684 | 99.49  |
| 9 | 111892573 | 111929571 | FRRS1L   | 1362  | 70.14  |
| 9 | 116148597 | 116163613 | ALAD     | 395   | 100.00 |
| 9 | 119449581 | 119463579 | TRIM32   | 16380 | 100.00 |
| 9 | 119449581 | 119463579 | TRIM32   | 16380 | 100.00 |
| 9 | 123151147 | 123342448 | CDK5RAP2 | 18672 | 100.00 |
| 9 | 126118449 | 126142603 | CRB2     | 18688 | 97.94  |
| 9 | 127243516 | 127269709 | NR5A1    | 7983  | 100.00 |
| 9 | 127243516 | 127269709 | NR5A1    | 7983  | 100.00 |
| 9 | 129376722 | 129463311 | LMX1B    | 6654  | 97.99  |
| 9 | 130374544 | 130457460 | STXBP1   | 11444 | 100.00 |
| 9 | 130374544 | 130457460 | STXBP1   | 11444 | 100.00 |
| 9 | 130965658 | 131017527 | DNM1     | 2972  | 100.00 |
| 9 | 131084815 | 131096351 | COQ4     | 19693 | 100.00 |
| 9 | 131102925 | 131123749 | SLC27A4  | 10998 | 100.00 |
| 9 | 131266979 | 131304567 | GLE1     | 4315  | 100.00 |
| 9 | 131314866 | 131395941 | SPTAN1   | 11273 | 100.00 |
| 9 | 131395940 | 131419066 | WDR34    | 28296 | 100.00 |
| 9 | 131395940 | 131419066 | WDR34    | 28296 | 100.00 |
| 9 | 131445703 | 131458679 | SET      | 10760 | 89.12  |
| 9 | 131707809 | 131709898 | DOLK     | 23406 | 100.00 |
| 9 | 133320316 | 133376661 | ASS1     | 758   | 88.30  |
| 9 | 133539981 | 133558368 | PRDM12   | 13997 | 89.58  |
| 9 | 133589333 | 133763062 | ABL1     | 76    | 100.00 |
| 9 | 133884469 | 133969860 | LAMC3    | 6494  | 92.98  |
| 9 | 134378289 | 134399193 | POMT1    | 9202  | 96.61  |
| 9 | 134378289 | 134399193 | POMT1    | 9202  | 96.61  |
| 9 | 134378289 | 134399193 | POMT1    | 9202  | 96.61  |
| 9 | 135766735 | 135820020 | TSC1     | 12362 | 99.52  |
| 9 | 136218610 | 136223552 | SURF1    | 11474 | 88.26  |
| 9 | 136218610 | 136223552 | SURF1    | 11474 | 88.26  |
| 9 | 138594031 | 138684992 | KCNT1    | 18865 | 98.41  |
| 9 | 138594031 | 138684992 | KCNT1    | 18865 | 98.41  |
| 9 | 139088096 | 139096955 | LHX3     | 6595  | 100.00 |
| 9 | 139323071 | 139334274 | INPP5E   | 21474 | 99.38  |
| 9 | 139323071 | 139334274 | INPP5E   | 21474 | 99.38  |
| 9 | 139388896 | 139440314 | NOTCH1   | 7881  | 97.84  |
| 9 | 139388896 | 139440314 | NOTCH1   | 7881  | 97.84  |

|    |           |           |          |       |        |
|----|-----------|-----------|----------|-------|--------|
| 9  | 139981379 | 140003635 | MAN1B1   | 6823  | 99.29  |
| 9  | 140032842 | 140063207 | GRIN1    | 4584  | 100.00 |
| 9  | 140513444 | 140764468 | EHMT1    | 24650 | 98.03  |
| 10 | 180405    | 300577    | ZMYND11  | 16966 | 98.95  |
| 10 | 12110971  | 12165224  | DHTKD1   | 23537 | 100.00 |
| 10 | 15555948  | 15762124  | ITGA8    | 6144  | 100.00 |
| 10 | 23481256  | 23483181  | PTF1A    | 23734 | 92.00  |
| 10 | 23481256  | 23483181  | PTF1A    | 23734 | 92.00  |
| 10 | 26986588  | 27035727  | PDSS1    | 17759 | 91.83  |
| 10 | 27280843  | 27389421  | ANKRD26  | 29186 | 88.02  |
| 10 | 27793197  | 27831143  | RAB18    | 14244 | 95.82  |
| 10 | 28064115  | 28287977  | ARMC4    | 25583 | 100.00 |
| 10 | 28821422  | 28912041  | WAC      | 17327 | 99.69  |
| 10 | 28821422  | 28912041  | WAC      | 17327 | 99.69  |
| 10 | 43572475  | 43625799  | RET      | 9967  | 99.22  |
| 10 | 43572475  | 43625799  | RET      | 9967  | 99.22  |
| 10 | 50663414  | 50747584  | ERCC6    | 3438  | 100.00 |
| 10 | 50663414  | 50747584  | ERCC6    | 3438  | 100.00 |
| 10 | 50663414  | 50747584  | ERCC6    | 3438  | 100.00 |
| 10 | 50663414  | 50747584  | ERCC6    | 3438  | 100.00 |
| 10 | 64571756  | 64679660  | EGR2     | 3239  | 100.00 |
| 10 | 69556427  | 69597924  | DNAJC12  | 28908 | 100.00 |
| 10 | 70748487  | 70776738  | KIF1BP   | 23419 | 100.00 |
| 10 | 71561644  | 71724031  | COL13A1  | 2190  | 100.00 |
| 10 | 72192071  | 72207707  | NODAL    | 7865  | 100.00 |
| 10 | 72642037  | 72648541  | PCBD1    | 8646  | 99.05  |
| 10 | 73576055  | 73611126  | PSAP     | 9498  | 100.00 |
| 10 | 73724123  | 73773322  | CHST3    | 1971  | 99.86  |
| 10 | 74127098  | 74385899  | MICU1    | 1530  | 94.20  |
| 10 | 76585340  | 76792380  | KAT6B    | 17582 | 95.34  |
| 10 | 76585340  | 76792380  | KAT6B    | 17582 | 95.34  |
| 10 | 79734907  | 79789303  | POLR3A   | 30074 | 97.60  |
| 10 | 82031576  | 82049440  | MAT1A    | 6903  | 96.80  |
| 10 | 88428206  | 88495825  | LDB3     | 15710 | 100.00 |
| 10 | 88428206  | 88495825  | LDB3     | 15710 | 100.00 |
| 10 | 88428206  | 88495825  | LDB3     | 15710 | 100.00 |
| 10 | 88810243  | 88854623  | GLUD1    | 4335  | 84.08  |
| 10 | 89419370  | 89507462  | PAPSS2   | 8604  | 100.00 |
| 10 | 89622870  | 89731687  | PTEN     | 9588  | 100.00 |
| 10 | 89622870  | 89731687  | PTEN     | 9588  | 100.00 |
| 10 | 89622870  | 89731687  | PTEN     | 9588  | 100.00 |
| 10 | 89622870  | 89731687  | PTEN     | 9588  | 100.00 |
| 10 | 89622870  | 89731687  | PTEN     | 9588  | 100.00 |
| 10 | 89622870  | 89731687  | PTEN     | 9588  | 100.00 |
| 10 | 90521163  | 90537999  | LIPN     | 23452 | 99.83  |
| 10 | 90694831  | 90751147  | ACTA2    | 130   | 96.03  |
| 10 | 90694831  | 90751147  | ACTA2    | 130   | 96.03  |
| 10 | 94353043  | 94415150  | KIF11    | 6388  | 96.15  |
| 10 | 95753746  | 96092580  | PLCE1    | 17175 | 98.37  |
| 10 | 97365696  | 97416463  | ALDH18A1 | 9722  | 100.00 |

|    |           |           |          |       |        |
|----|-----------|-----------|----------|-------|--------|
| 10 | 97365696  | 97416463  | ALDH18A1 | 9722  | 100.00 |
| 10 | 97365696  | 97416463  | ALDH18A1 | 9722  | 100.00 |
| 10 | 97423158  | 97453900  | TCTN3    | 24519 | 100.00 |
| 10 | 100175955 | 100206684 | HPS1     | 5163  | 100.00 |
| 10 | 100218875 | 100995619 | HPSE2    | 18374 | 99.89  |
| 10 | 101471601 | 101491857 | COX15    | 2263  | 97.57  |
| 10 | 101471601 | 101491857 | COX15    | 2263  | 97.57  |
| 10 | 101948055 | 101989376 | CHUK     | 1974  | 100.00 |
| 10 | 102495360 | 102589698 | PAX2     | 8616  | 100.00 |
| 10 | 103989943 | 104001231 | PITX3    | 9006  | 100.00 |
| 10 | 103989943 | 104001231 | PITX3    | 9006  | 100.00 |
| 10 | 103989943 | 104001231 | PITX3    | 9006  | 100.00 |
| 10 | 104263744 | 104393292 | SUFU     | 16466 | 98.79  |
| 10 | 112327449 | 112364394 | SMC3     | 2468  | 84.86  |
| 10 | 112679301 | 112773425 | SHOC2    | 15454 | 99.37  |
| 10 | 122610687 | 122669036 | WDR11    | 13831 | 92.63  |
| 10 | 123237848 | 123357972 | FGFR2    | 3689  | 96.61  |
| 10 | 123237848 | 123357972 | FGFR2    | 3689  | 96.61  |
| 10 | 123237848 | 123357972 | FGFR2    | 3689  | 96.61  |
| 10 | 123237848 | 123357972 | FGFR2    | 3689  | 96.61  |
| 10 | 123237848 | 123357972 | FGFR2    | 3689  | 96.61  |
| 10 | 123237848 | 123357972 | FGFR2    | 3689  | 96.61  |
| 10 | 123237848 | 123357972 | FGFR2    | 3689  | 96.61  |
| 10 | 123237848 | 123357972 | FGFR2    | 3689  | 96.61  |
| 10 | 127455022 | 127464390 | MMP21    | 14357 | 97.95  |
| 10 | 127477146 | 127511817 | UROS     | 12592 | 100.00 |
| 10 | 131633547 | 131762105 | EBF3     | 19087 | 99.88  |
| 10 | 134598297 | 134599556 | NKX6-2   | 19321 | 90.77  |
| 11 | 298200    | 299526    | IFITM5   | 16644 | 94.49  |
| 11 | 532242    | 537287    | HRAS     | 5173  | 100.00 |
| 11 | 532242    | 537287    | HRAS     | 5173  | 100.00 |
| 11 | 644233    | 706715    | DEAF1    | 14677 | 100.00 |
| 11 | 790475    | 798316    | SLC25A22 | 19954 | 95.16  |
| 11 | 832843    | 839831    | CD151    | 1630  | 100.00 |
| 11 | 1773982   | 1785222   | CTSD     | 2529  | 100.00 |
| 11 | 2150342   | 2170833   | IGF2     | 5466  | 100.00 |
| 11 | 2150342   | 2170833   | IGF2     | 5466  | 100.00 |
| 11 | 2185159   | 2193107   | TH       | 11782 | 95.49  |
| 11 | 2465914   | 2870339   | KCNQ1    | 6294  | 94.73  |
| 11 | 2904443   | 2907111   | CDKN1C   | 1786  | 82.86  |
| 11 | 3818954   | 3847601   | PGAP2    | 17893 | 100.00 |
| 11 | 6411655   | 6416228   | SMPD1    | 11120 | 100.00 |
| 11 | 6411655   | 6416228   | SMPD1    | 11120 | 100.00 |
| 11 | 6634000   | 6640692   | TPP1     | 2073  | 100.00 |
| 11 | 6642556   | 6677085   | DCHS1    | 13681 | 98.79  |
| 11 | 9160372   | 9286937   | DENND5A  | 19344 | 100.00 |
| 11 | 13513602  | 13517728  | PTH      | 9606  | 97.41  |
| 11 | 13690217  | 13753893  | FAR1     | 26222 | 94.12  |
| 11 | 17407406  | 17410878  | KCNJ11   | 6257  | 100.00 |
| 11 | 17407406  | 17410878  | KCNJ11   | 6257  | 100.00 |



|    |          |          |          |       |        |
|----|----------|----------|----------|-------|--------|
| 11 | 17407406 | 17410878 | KCNJ11   | 6257  | 100.00 |
| 11 | 17756359 | 17804602 | KCNC1    | 6233  | 100.00 |
| 11 | 20620946 | 20680831 | SLC6A5   | 11051 | 100.00 |
| 11 | 22214722 | 22304903 | ANO5     | 27337 | 94.15  |
| 11 | 22214722 | 22304903 | ANO5     | 27337 | 94.15  |
| 11 | 22644079 | 22647387 | FANCF    | 3587  | 100.00 |
| 11 | 31806340 | 31839509 | PAX6     | 8620  | 100.00 |
| 11 | 31806340 | 31839509 | PAX6     | 8620  | 100.00 |
| 11 | 31806340 | 31839509 | PAX6     | 8620  | 100.00 |
| 11 | 31806340 | 31839509 | PAX6     | 8620  | 100.00 |
| 11 | 31806340 | 31839509 | PAX6     | 8620  | 100.00 |
| 11 | 31806340 | 31839509 | PAX6     | 8620  | 100.00 |
| 11 | 31806340 | 31839509 | PAX6     | 8620  | 100.00 |
| 11 | 31806340 | 31839509 | PAX6     | 8620  | 100.00 |
| 11 | 32409321 | 32457176 | WT1      | 12796 | 99.29  |
| 11 | 32409321 | 32457176 | WT1      | 12796 | 99.29  |
| 11 | 34937376 | 35042138 | PDHX     | 21350 | 100.00 |
| 11 | 35272753 | 35441610 | SLC1A2   | 10940 | 100.00 |
| 11 | 44117099 | 44266979 | EXT2     | 3513  | 97.26  |
| 11 | 44281994 | 44331716 | ALX4     | 450   | 100.00 |
| 11 | 44281994 | 44331716 | ALX4     | 450   | 100.00 |
| 11 | 45825623 | 45834566 | SLC35C1  | 20197 | 99.36  |
| 11 | 45931220 | 45940363 | PEX16    | 8857  | 86.12  |
| 11 | 45931220 | 45940363 | PEX16    | 8857  | 86.12  |
| 11 | 45950871 | 46142985 | PHF21A   | 24156 | 100.00 |
| 11 | 46878419 | 46940193 | LRP4     | 6696  | 100.00 |
| 11 | 47236493 | 47260767 | DDB2     | 2718  | 96.08  |
| 11 | 47428683 | 47438047 | SLC39A13 | 20859 | 100.00 |
| 11 | 47428683 | 47438047 | SLC39A13 | 20859 | 100.00 |
| 11 | 47459308 | 47470730 | RAPSN    | 9863  | 92.01  |
| 11 | 47459308 | 47470730 | RAPSN    | 9863  | 92.01  |
| 11 | 57416465 | 57429340 | CLP1     | 16999 | 100.00 |
| 11 | 57520715 | 57587018 | CTNND1   | 2515  | 100.00 |
| 11 | 58910221 | 58922512 | FAM111A  | 24725 | 98.47  |
| 11 | 61159159 | 61166335 | TMEM216  | 25018 | 94.52  |
| 11 | 64373646 | 64490660 | NRXN2    | 8009  | 100.00 |
| 11 | 65292548 | 65306175 | SCYL1    | 14372 | 100.00 |
| 11 | 65306276 | 65326401 | LTBP3    | 6716  | 100.00 |
| 11 | 65482367 | 65488418 | RNASEH2C | 24116 | 100.00 |
| 11 | 65769550 | 65771620 | BANF1    | 17397 | 99.63  |
| 11 | 65837834 | 66012218 | PACS1    | 30032 | 89.92  |
| 11 | 66278077 | 66301098 | BBS1     | 966   | 100.00 |
| 11 | 66615704 | 66725847 | PC       | 8636  | 100.00 |
| 11 | 67374323 | 67380006 | NDUFV1   | 7716  | 96.77  |
| 11 | 67798084 | 67804111 | NDUFS8   | 7715  | 99.53  |
| 11 | 67922330 | 67981295 | KMT5B    | 24283 | 98.68  |
| 11 | 68080077 | 68216743 | LRP5     | 6697  | 99.82  |
| 11 | 68080077 | 68216743 | LRP5     | 6697  | 99.82  |
| 11 | 68080077 | 68216743 | LRP5     | 6697  | 99.82  |
| 11 | 68080077 | 68216743 | LRP5     | 6697  | 99.82  |
| 11 | 68080077 | 68216743 | LRP5     | 6697  | 99.82  |

|    |           |           |          |       |        |
|----|-----------|-----------|----------|-------|--------|
| 11 | 68671310  | 68708070  | IGHMBP2  | 5542  | 96.32  |
| 11 | 69624992  | 69633792  | FGF3     | 3681  | 100.00 |
| 11 | 70313961  | 70963623  | SHANK2   | 14295 | 98.64  |
| 11 | 71139239  | 71163914  | DHCR7    | 2860  | 100.00 |
| 11 | 71900602  | 71907345  | FOLR1    | 3791  | 100.00 |
| 11 | 71934745  | 71950149  | INPPL1   | 6080  | 100.00 |
| 11 | 72003469  | 72145692  | CLPB     | 30664 | 100.00 |
| 11 | 73723763  | 73882255  | C2CD3    | 24564 | 100.00 |
| 11 | 74202757  | 74204778  | LIPT2    | 37216 | 92.24  |
| 11 | 76839310  | 76926284  | MYO7A    | 7606  | 96.42  |
| 11 | 76839310  | 76926284  | MYO7A    | 7606  | 96.42  |
| 11 | 77811982  | 77850706  | ALG8     | 23161 | 100.00 |
| 11 | 85339629  | 85347580  | TMEM126B | 30883 | 94.08  |
| 11 | 85955586  | 85989855  | EED      | 3188  | 94.27  |
| 11 | 88910620  | 89028927  | TYR      | 12442 | 100.00 |
| 11 | 93517393  | 93547861  | MED17    | 2375  | 100.00 |
| 11 | 94152895  | 94227074  | MRE11    | 7230  | 83.28  |
| 11 | 95523129  | 95565857  | CEP57    | 30794 | 93.08  |
| 11 | 101981192 | 102104154 | YAP1     | 16262 | 88.43  |
| 11 | 102813724 | 102826463 | MMP13    | 7159  | 100.00 |
| 11 | 102813724 | 102826463 | MMP13    | 7159  | 100.00 |
| 11 | 102980160 | 103350591 | DYNC2H1  | 2962  | 96.70  |
| 11 | 102980160 | 103350591 | DYNC2H1  | 2962  | 96.70  |
| 11 | 107992243 | 108018503 | ACAT1    | 93    | 98.99  |
| 11 | 108093211 | 108239829 | ATM      | 795   | 96.35  |
| 11 | 108376158 | 108464465 | EXPH5    | 30578 | 100.00 |
| 11 | 111652919 | 111742305 | ALG9     | 15672 | 100.00 |
| 11 | 111895538 | 111935114 | DLAT     | 2896  | 100.00 |
| 11 | 112097088 | 112140678 | PTS      | 9689  | 92.95  |
| 11 | 118307205 | 118397539 | KMT2A    | 7132  | 99.98  |
| 11 | 118443105 | 118473748 | ARCN1    | 649   | 100.00 |
| 11 | 118967213 | 118979041 | DPAGT1   | 2995  | 100.00 |
| 11 | 118967213 | 118979041 | DPAGT1   | 2995  | 100.00 |
| 11 | 119076752 | 119178859 | CBL      | 1541  | 99.34  |
| 11 | 119209652 | 119217383 | MFRP     | 18121 | 100.00 |
| 11 | 119209652 | 119217383 | MFRP     | 18121 | 100.00 |
| 11 | 121163162 | 121179403 | SC5D     | 10547 | 97.89  |
| 11 | 122943035 | 123065989 | CLMP     | 24039 | 99.02  |
| 11 | 125753509 | 125770543 | HYLS1    | 26558 | 100.00 |
| 11 | 125825691 | 125933230 | CDON     | 17104 | 98.95  |
| 11 | 126138950 | 126148026 | FOXRED1  | 26927 | 99.93  |
| 11 | 130029457 | 130080271 | ST14     | 11344 | 100.00 |
| 11 | 133938820 | 134021896 | JAM3     | 15532 | 100.00 |
| 12 | 2079952   | 2802108   | CACNA1C  | 1390  | 100.00 |
| 12 | 4382938   | 4414516   | CCND2    | 1583  | 100.00 |
| 12 | 6679249   | 6716642   | CHD4     | 1919  | 100.00 |
| 12 | 7052141   | 7055166   | C12orf57 | 29521 | 98.43  |
| 12 | 7072408   | 7105520   | EMG1     | 16912 | 100.00 |
| 12 | 7341281   | 7371170   | PEX5     | 9719  | 100.00 |
| 12 | 7341281   | 7371170   | PEX5     | 9719  | 100.00 |

|    |          |          |         |       |        |
|----|----------|----------|---------|-------|--------|
| 12 | 7341281  | 7371170  | PEX5    | 9719  | 100.00 |
| 12 | 13693165 | 14133053 | GRIN2B  | 4586  | 98.58  |
| 12 | 13693165 | 14133053 | GRIN2B  | 4586  | 98.58  |
| 12 | 13693165 | 14133053 | GRIN2B  | 4586  | 98.58  |
| 12 | 14765576 | 14849519 | GUCY2C  | 4688  | 100.00 |
| 12 | 14765576 | 14849519 | GUCY2C  | 4688  | 100.00 |
| 12 | 15034115 | 15038860 | MGP     | 7060  | 100.00 |
| 12 | 15125956 | 15134799 | PDE6H   | 8790  | 95.63  |
| 12 | 15125956 | 15134799 | PDE6H   | 8790  | 95.63  |
| 12 | 21590549 | 21623300 | PYROXD1 | 26162 | 82.17  |
| 12 | 21950335 | 22094336 | ABCC9   | 60    | 100.00 |
| 12 | 23682440 | 24103966 | SOX5    | 11201 | 97.80  |
| 12 | 25357723 | 25403870 | KRAS    | 6407  | 100.00 |
| 12 | 25357723 | 25403870 | KRAS    | 6407  | 100.00 |
| 12 | 28111017 | 28125638 | PTHLH   | 9607  | 100.00 |
| 12 | 28111017 | 28125638 | PTHLH   | 9607  | 100.00 |
| 12 | 31226779 | 31257725 | DDX11   | 2736  | 79.56  |
| 12 | 46123448 | 46301823 | ARID2   | 18037 | 92.13  |
| 12 | 48235320 | 48336831 | VDR     | 12679 | 99.02  |
| 12 | 48366748 | 48398269 | COL2A1  | 2200  | 100.00 |
| 12 | 48366748 | 48398269 | COL2A1  | 2200  | 100.00 |
| 12 | 48366748 | 48398269 | COL2A1  | 2200  | 100.00 |
| 12 | 48366748 | 48398269 | COL2A1  | 2200  | 100.00 |
| 12 | 48366748 | 48398269 | COL2A1  | 2200  | 100.00 |
| 12 | 48366748 | 48398269 | COL2A1  | 2200  | 100.00 |
| 12 | 48366748 | 48398269 | COL2A1  | 2200  | 100.00 |
| 12 | 48366748 | 48398269 | COL2A1  | 2200  | 100.00 |
| 12 | 48366748 | 48398269 | COL2A1  | 2200  | 100.00 |
| 12 | 49297893 | 49325623 | CCDC65  | 29937 | 96.90  |
| 12 | 49359123 | 49365546 | WNT10B  | 12775 | 100.00 |
| 12 | 49372398 | 49375459 | WNT1    | 12774 | 100.00 |
| 12 | 49412758 | 49453557 | KMT2D   | 7133  | 100.00 |
| 12 | 49578579 | 49583107 | TUBA1A  | 20766 | 98.38  |
| 12 | 49578579 | 49583107 | TUBA1A  | 20766 | 98.38  |
| 12 | 51984050 | 52206648 | SCN8A   | 10596 | 99.72  |
| 12 | 51984050 | 52206648 | SCN8A   | 10596 | 99.72  |
| 12 | 52959566 | 52967609 | KRT74   | 28929 | 100.00 |
| 12 | 53701240 | 53718648 | AAAS    | 13666 | 99.45  |
| 12 | 54332535 | 54340328 | HOXC13  | 5125  | 100.00 |
| 12 | 56078352 | 56109827 | ITGA7   | 6143  | 100.00 |
| 12 | 57403784 | 57422667 | TAC3    | 11521 | 100.00 |
| 12 | 64173583 | 64203338 | RXYLT1  | 13530 | 97.22  |
| 12 | 65107225 | 65153227 | GNS     | 4422  | 93.85  |
| 12 | 65563351 | 65642107 | LEMD3   | 28887 | 99.76  |
| 12 | 65563351 | 65642107 | LEMD3   | 28887 | 99.76  |
| 12 | 69080514 | 69136785 | NUP107  | 29914 | 99.95  |
| 12 | 76738254 | 76742222 | BBS10   | 26291 | 99.31  |
| 12 | 80603233 | 80772870 | OTOGL   | 26901 | 91.46  |
| 12 | 85673885 | 85695562 | ALX1    | 1494  | 94.39  |
| 12 | 88442793 | 88535993 | CEP290  | 29021 | 88.43  |
| 12 | 88442793 | 88535993 | CEP290  | 29021 | 88.43  |

|    |           |           |          |       |            |
|----|-----------|-----------|----------|-------|------------|
| 12 | 88442793  | 88535993  | CEP290   | 29021 | 88.43      |
| 12 | 88442793  | 88535993  | CEP290   | 29021 | 88.43      |
| 12 | 88442793  | 88535993  | CEP290   | 29021 | 88.43      |
| 12 | 88536073  | 88593664  | TMTC3    | 26899 | 96.25      |
| 12 | 89813495  | 89919801  | POC1B    | 30836 | 96.90      |
| 12 | 94071151  | 94288616  | CRADD    | 2340  | 91.00      |
| 12 | 94700225  | 94853764  | CEP83    | 17966 | 98.27      |
| 12 | 102139275 | 102224716 | GNPTAB   | 29670 | 100.00     |
| 12 | 102139275 | 102224716 | GNPTAB   | 29670 | 100.00     |
| 12 | 102789645 | 102874423 | IGF1     | 5464  | 100.00     |
| 12 | 103230663 | 103352188 | PAH      | 8582  | 100.00     |
| 12 | 103230663 | 103352188 | PAH      | 8582  | 100.00     |
| 12 | 106751436 | 106903976 | POLR3B   | 30348 | 98.23      |
| 12 | 106751436 | 106903976 | POLR3B   | 30348 | 98.23      |
| 12 | 109915207 | 109974507 | UBE3B    | 13478 | 100.00     |
| 12 | 109991542 | 110011679 | MMAB     | 19331 | 100.00     |
| 12 | 110220890 | 110271212 | TRPV4    | 18083 | 100.00     |
| 12 | 110220890 | 110271212 | TRPV4    | 18083 | 100.00     |
| 12 | 111051832 | 111087235 | TCTN1    | 26113 | 97.04      |
| 12 | 112856155 | 112947717 | PTPN11   | 9644  | 93.74      |
| 12 | 112856155 | 112947717 | PTPN11   | 9644  | 93.74      |
| 12 | 114791736 | 114846247 | TBX5     | 11604 | 100.00     |
| 12 | 115108059 | 115121969 | TBX3     | 11602 | 98.97      |
| 12 | 116395711 | 116715143 | MED13L   | 22962 | 97.91      |
| 12 | 120123595 | 120315095 | CIT      | 1985  | 100.00     |
| 12 | 121163538 | 121177811 | ACADS    | 90    | 100.00     |
| 12 | 122277433 | 122301502 | HPD      | 5147  | 100.00     |
| 12 | 122277433 | 122301502 | HPD      | 5147  | 100.00     |
| 12 | 123717463 | 123742506 | C12orf65 | 26784 | 100.00     |
| 12 | 124155660 | 124192948 | TCTN2    | 25774 | 100.00     |
| 13 | 20712394  | 20735188  | GJA3     | 4277  | 100.00     |
| 13 | 20761609  | 20767037  | GJB2     | 4284  | 100.00     |
| 13 | 20761609  | 20767037  | GJB2     | 4284  | 100.00     |
| 13 | 20761609  | 20767037  | GJB2     | 4284  | 100.00     |
| 13 | 20761609  | 20767037  | GJB2     | 4284  | 100.00     |
| 13 | 20761609  | 20767037  | GJB2     | 4284  | 100.00     |
| 13 | 20761609  | 20767037  | GJB2     | 4284  | 100.00     |
| 13 | 22245522  | 22278637  | FGF9     | 3687  | 100.00     |
| 13 | 23902965  | 24007841  | SACS     | 10519 | 100.00     |
| 13 | 25457171  | 25497018  | CENPJ    | 17272 | 100.00     |
| 13 | 25457171  | 25497018  | CENPJ    | 17272 | 100.00     |
| 13 | 28194903  | 28241548  | POLR1D   | 20422 | 100.00     |
| 13 | 32889611  | 32973805  | BRCA2    | 1101  | 99.22      |
| 13 | 39261266  | 39460074  | FREM2    | 25396 | 100.00     |
| 13 | 41363548  | 41384247  | SLC25A15 | 10985 | 93.93      |
| 13 | 51483814  | 51544592  | RNASEH2B | 25671 | 100.00     |
| 13 | 52586534  | 52603800  | ALG11    | 32456 | 100.00     |
| 13 | 77564795  | 77576652  | CLN5     | 2076  | 100.00     |
| 13 | 78469616  | 78493903  | EDNRB    | 3180  | 98.31      |
| 13 | 92000074  | 92006833  | MIR17HG  | 23564 | No protein |
| 13 | 93879095  | 95059655  | GPC6     | 4454  | 100.00     |

|    |           |           |          |       |        |
|----|-----------|-----------|----------|-------|--------|
| 13 | 95226308  | 95248511  | TGDS     | 20324 | 97.56  |
| 13 | 100634026 | 100639018 | ZIC2     | 12873 | 94.43  |
| 13 | 100741269 | 101182686 | PCCA     | 8653  | 95.38  |
| 13 | 101706130 | 102068843 | NALCN    | 19082 | 100.00 |
| 13 | 101706130 | 102068843 | NALCN    | 19082 | 100.00 |
| 13 | 101706130 | 102068843 | NALCN    | 19082 | 100.00 |
| 13 | 103497194 | 103528345 | ERCC5    | 3437  | 99.28  |
| 13 | 108859787 | 108870716 | LIG4     | 6601  | 100.00 |
| 13 | 108859787 | 108870716 | LIG4     | 6601  | 100.00 |
| 13 | 110801318 | 110959496 | COL4A1   | 2202  | 95.48  |
| 13 | 110958159 | 111165374 | COL4A2   | 2203  | 98.31  |
| 13 | 111293759 | 111365950 | CARS2    | 25695 | 99.64  |
| 13 | 115079988 | 115092796 | CHAMP1   | 20311 | 100.00 |
| 14 | 20914570  | 20923264  | OSGEP    | 18028 | 98.43  |
| 14 | 21756098  | 21819460  | RPGRIP1  | 13436 | 100.00 |
| 14 | 21756098  | 21819460  | RPGRIP1  | 13436 | 100.00 |
| 14 | 21853353  | 21924285  | CHD8     | 20153 | 99.68  |
| 14 | 23851199  | 23877486  | MYH6     | 7576  | 97.46  |
| 14 | 23851199  | 23877486  | MYH6     | 7576  | 97.46  |
| 14 | 23851199  | 23877486  | MYH6     | 7576  | 97.46  |
| 14 | 24708849  | 24711880  | TINF2    | 11824 | 100.00 |
| 14 | 29235050  | 29238870  | FOXG1    | 3811  | 86.80  |
| 14 | 30045687  | 30661104  | PRKD1    | 9407  | 100.00 |
| 14 | 31494312  | 31562818  | AP4S1    | 575   | 100.00 |
| 14 | 31959162  | 32330430  | NUBPL    | 20278 | 95.83  |
| 14 | 35179593  | 35184029  | CFL2     | 1875  | 99.40  |
| 14 | 36985602  | 36990354  | NKX2-1   | 11825 | 100.00 |
| 14 | 36985602  | 36990354  | NKX2-1   | 11825 | 100.00 |
| 14 | 37126773  | 37148920  | PAX9     | 8623  | 99.61  |
| 14 | 45605143  | 45670093  | FANCM    | 23168 | 95.91  |
| 14 | 45605143  | 45670093  | FANCM    | 23168 | 95.91  |
| 14 | 50087489  | 50090198  | MGAT2    | 7045  | 100.00 |
| 14 | 50704281  | 50779266  | L2HGDH   | 20499 | 96.84  |
| 14 | 51324609  | 51411454  | PYGL     | 9725  | 100.00 |
| 14 | 53510686  | 53620000  | DDHD1    | 19714 | 96.89  |
| 14 | 54416454  | 54425479  | BMP4     | 1071  | 100.00 |
| 14 | 54416454  | 54425479  | BMP4     | 1071  | 100.00 |
| 14 | 55308726  | 55369570  | GCH1     | 4193  | 100.00 |
| 14 | 55308726  | 55369570  | GCH1     | 4193  | 100.00 |
| 14 | 56955072  | 57117324  | TMEM260  | 20185 | 97.69  |
| 14 | 57267425  | 57277197  | OTX2     | 8522  | 98.66  |
| 14 | 58894103  | 59015216  | KIAA0586 | 19960 | 95.67  |
| 14 | 61110133  | 61124977  | SIX1     | 10887 | 97.66  |
| 14 | 61110133  | 61124977  | SIX1     | 10887 | 97.66  |
| 14 | 68194091  | 68283307  | ZFYVE26  | 20761 | 98.89  |
| 14 | 70320848  | 70499083  | SMOC1    | 20318 | 97.25  |
| 14 | 74706175  | 74729441  | VSX2     | 1975  | 99.72  |
| 14 | 74706175  | 74729441  | VSX2     | 1975  | 99.72  |
| 14 | 74706175  | 74729441  | VSX2     | 1975  | 99.72  |
| 14 | 74752126  | 74769759  | ABCD4    | 68    | 98.60  |

|    |           |           |         |       |        |
|----|-----------|-----------|---------|-------|--------|
| 14 | 74942895  | 74960880  | NPC2    | 14537 | 100.00 |
| 14 | 74964873  | 75079306  | LTBP2   | 6715  | 96.62  |
| 14 | 74964873  | 75079306  | LTBP2   | 6715  | 96.62  |
| 14 | 76044960  | 76129557  | FLVCR2  | 20105 | 100.00 |
| 14 | 76368479  | 76550928  | IFT43   | 29669 | 100.00 |
| 14 | 76424442  | 76449334  | TGFB3   | 11769 | 100.00 |
| 14 | 77741299  | 77787227  | POMT2   | 19743 | 94.69  |
| 14 | 77741299  | 77787227  | POMT2   | 19743 | 94.69  |
| 14 | 77741299  | 77787227  | POMT2   | 19743 | 94.69  |
| 14 | 77893018  | 77924295  | VIPAS39 | 20347 | 100.00 |
| 14 | 77972340  | 78083116  | SPTLC2  | 11278 | 100.00 |
| 14 | 81421333  | 81612646  | TSHR    | 12373 | 99.08  |
| 14 | 81421333  | 81612646  | TSHR    | 12373 | 99.08  |
| 14 | 88304164  | 88460009  | GALC    | 4115  | 97.23  |
| 14 | 89290497  | 89344335  | TTC8    | 20087 | 100.00 |
| 14 | 89290497  | 89344335  | TTC8    | 20087 | 100.00 |
| 14 | 91737667  | 91884188  | CCDC88C | 19967 | 98.76  |
| 14 | 92432335  | 92507240  | TRIP11  | 12305 | 91.08  |
| 14 | 92788925  | 92962596  | SLC24A4 | 10978 | 100.00 |
| 14 | 97263641  | 97398059  | VRK1    | 12718 | 100.00 |
| 14 | 100704635 | 100749129 | YY1     | 12856 | 100.00 |
| 14 | 102430865 | 102517129 | DYNC1H1 | 2961  | 100.00 |
| 14 | 102430865 | 102517129 | DYNC1H1 | 2961  | 100.00 |
| 14 | 102829300 | 102968818 | TECPR2  | 19957 | 100.00 |
| 14 | 104029299 | 104073860 | APOPT1  | 20492 | 100.00 |
| 14 | 105235686 | 105262088 | AKT1    | 391   | 100.00 |
| 15 | 23888691  | 23891175  | MAGEL2  | 6814  | 100.00 |
| 15 | 23888691  | 23891175  | MAGEL2  | 6814  | 100.00 |
| 15 | 25582381  | 25684128  | UBE3A   | 12496 | 77.33  |
| 15 | 26788693  | 27184686  | GABRB3  | 4083  | 95.04  |
| 15 | 26788693  | 27184686  | GABRB3  | 4083  | 95.04  |
| 15 | 31293264  | 31453476  | TRPM1   | 7146  | 100.00 |
| 15 | 34525460  | 34630261  | SLC12A6 | 10914 | 100.00 |
| 15 | 38544527  | 38649450  | SPRED1  | 20249 | 97.53  |
| 15 | 40453224  | 40513337  | BUB1B   | 1149  | 100.00 |
| 15 | 40697686  | 40728146  | IVD     | 6186  | 100.00 |
| 15 | 40763160  | 40765353  | CHST14  | 24464 | 98.05  |
| 15 | 40986972  | 41024354  | RAD51   | 9817  | 88.17  |
| 15 | 41221538  | 41231237  | DLL4    | 2910  | 98.20  |
| 15 | 43235095  | 43398311  | UBR1    | 16808 | 98.10  |
| 15 | 43661419  | 43699293  | TUBGCP4 | 16691 | 99.45  |
| 15 | 44854894  | 44955876  | SPG11   | 11226 | 100.00 |
| 15 | 45653322  | 45694525  | GATM    | 4175  | 100.00 |
| 15 | 45879321  | 45908197  | BLOC1S6 | 8549  | 100.00 |
| 15 | 48700503  | 48938046  | FBN1    | 3603  | 100.00 |
| 15 | 48700503  | 48938046  | FBN1    | 3603  | 100.00 |
| 15 | 48700503  | 48938046  | FBN1    | 3603  | 100.00 |
| 15 | 48700503  | 48938046  | FBN1    | 3603  | 100.00 |
| 15 | 49005125  | 49103343  | CEP152  | 29298 | 97.43  |
| 15 | 49005125  | 49103343  | CEP152  | 29298 | 97.43  |

|    |           |           |         |       |        |
|----|-----------|-----------|---------|-------|--------|
| 15 | 51200869  | 51298097  | AP4E1   | 573   | 98.59  |
| 15 | 51633826  | 51700210  | GLDN    | 29514 | 100.00 |
| 15 | 52413117  | 52483566  | GNB5    | 4401  | 96.38  |
| 15 | 52599480  | 52821247  | MYO5A   | 7602  | 98.62  |
| 15 | 52599480  | 52821247  | MYO5A   | 7602  | 98.62  |
| 15 | 55702723  | 55800432  | DNAAF4  | 21493 | 97.70  |
| 15 | 57210821  | 57591479  | TCF12   | 11623 | 100.00 |
| 15 | 64679947  | 64747502  | TRIP4   | 12310 | 100.00 |
| 15 | 65369154  | 65372276  | KBTBD13 | 37227 | 100.00 |
| 15 | 66018392  | 66184329  | RAB11A  | 9760  | 100.00 |
| 15 | 66679155  | 66784650  | MAP2K1  | 6840  | 95.01  |
| 15 | 67356101  | 67487533  | SMAD3   | 6769  | 98.83  |
| 15 | 68499330  | 68549549  | CLN6    | 2077  | 99.15  |
| 15 | 68499330  | 68549549  | CLN6    | 2077  | 99.15  |
| 15 | 72635775  | 72668817  | HEXA    | 4878  | 99.94  |
| 15 | 72978527  | 73030817  | BBS4    | 969   | 100.00 |
| 15 | 74471807  | 74504608  | STRA6   | 30650 | 99.63  |
| 15 | 75182346  | 75191798  | MPI     | 7216  | 100.00 |
| 15 | 75661720  | 75748183  | SIN3A   | 19353 | 95.67  |
| 15 | 76507696  | 76603813  | ETF A   | 3481  | 100.00 |
| 15 | 78396948  | 78423886  | CIB2    | 24579 | 100.00 |
| 15 | 78396948  | 78423886  | CIB2    | 24579 | 100.00 |
| 15 | 80444832  | 80479288  | FAH     | 3579  | 100.00 |
| 15 | 83328033  | 83378666  | AP3B2   | 567   | 98.86  |
| 15 | 85185999  | 85197574  | WDR73   | 25928 | 100.00 |
| 15 | 89346674  | 89418585  | ACAN    | 319   | 90.72  |
| 15 | 89346674  | 89418585  | ACAN    | 319   | 90.72  |
| 15 | 89787180  | 89860492  | FANCI   | 25568 | 100.00 |
| 15 | 89787180  | 89860492  | FANCI   | 25568 | 100.00 |
| 15 | 89859534  | 89878092  | POLG    | 9179  | 98.39  |
| 15 | 90152020  | 90198682  | KIF7    | 30497 | 88.27  |
| 15 | 90152020  | 90198682  | KIF7    | 30497 | 88.27  |
| 15 | 90303822  | 90321982  | MESP2   | 29659 | 89.28  |
| 15 | 91260558  | 91358859  | BLM     | 1058  | 100.00 |
| 15 | 91541646  | 91565833  | VPS33B  | 12712 | 100.00 |
| 15 | 93426526  | 93571237  | CHD2    | 1917  | 100.00 |
| 15 | 96869167  | 96883492  | NR2F2   | 7976  | 100.00 |
| 15 | 99192200  | 99507759  | IGF1R   | 5465  | 99.50  |
| 15 | 99192200  | 99507759  | IGF1R   | 5465  | 99.50  |
| 15 | 101099574 | 101143435 | LINS1   | 30922 | 99.47  |
| 15 | 101417919 | 101456831 | ALDH1A3 | 409   | 98.93  |
| 15 | 101715928 | 101792137 | CHSY1   | 17198 | 99.17  |
| 16 | 772582    | 776954    | CCDC78  | 14153 | 100.00 |
| 16 | 1401924   | 1413352   | GNPTG   | 23026 | 90.06  |
| 16 | 1494935   | 1525581   | CLCN7   | 2025  | 97.52  |
| 16 | 1543345   | 1560458   | TELO2   | 29099 | 100.00 |
| 16 | 1560428   | 1662111   | IFT140  | 29077 | 100.00 |
| 16 | 1821891   | 1823156   | MRPS34  | 16618 | 100.00 |
| 16 | 2097466   | 2138716   | TSC2    | 12363 | 100.00 |
| 16 | 2097466   | 2138716   | TSC2    | 12363 | 100.00 |

|    |          |                   |       |        |
|----|----------|-------------------|-------|--------|
| 16 | 2525147  | 2555735 TBC1D24   | 29203 | 99.88  |
| 16 | 2525147  | 2555735 TBC1D24   | 29203 | 99.88  |
| 16 | 2525147  | 2555735 TBC1D24   | 29203 | 99.88  |
| 16 | 3074028  | 3077756 THOC6     | 28369 | 100.00 |
| 16 | 3631182  | 3661599 SLX4      | 23845 | 99.48  |
| 16 | 3775055  | 3930727 CREBBP    | 2348  | 93.50  |
| 16 | 3775055  | 3930727 CREBBP    | 2348  | 93.50  |
| 16 | 4364762  | 4389598 GLIS2     | 29450 | 100.00 |
| 16 | 4846969  | 4852951 ROGDI     | 29478 | 100.00 |
| 16 | 5083703  | 5137380 ALG1      | 18294 | 50.39  |
| 16 | 8882680  | 8943188 PMM2      | 9115  | 100.00 |
| 16 | 9852376  | 10276611 GRIN2A   | 4585  | 100.00 |
| 16 | 9852376  | 10276611 GRIN2A   | 4585  | 100.00 |
| 16 | 14014014 | 14046202 ERCC4    | 3436  | 100.00 |
| 16 | 14014014 | 14046202 ERCC4    | 3436  | 100.00 |
| 16 | 14014014 | 14046202 ERCC4    | 3436  | 100.00 |
| 16 | 14014014 | 14046202 ERCC4    | 3436  | 100.00 |
| 16 | 14529558 | 14726585 PARN     | 8609  | 100.00 |
| 16 | 15737124 | 15820210 NDE1     | 17619 | 100.00 |
| 16 | 16242785 | 16317379 ABCC6    | 57    | 91.78  |
| 16 | 17195626 | 17564738 XYLT1    | 15516 | 100.00 |
| 16 | 23399814 | 23464501 COG7     | 18622 | 100.00 |
| 16 | 23614488 | 23652631 PALB2    | 26144 | 100.00 |
| 16 | 28477983 | 28506896 CLN3     | 2074  | 100.00 |
| 16 | 28853732 | 28857729 TUFM     | 12420 | 99.42  |
| 16 | 29802040 | 29816706 KIF22    | 6391  | 100.00 |
| 16 | 29823177 | 29827201 PRRT2    | 30500 | 100.00 |
| 16 | 29823177 | 29827201 PRRT2    | 30500 | 100.00 |
| 16 | 30064411 | 30081778 ALDOA    | 414   | 90.31  |
| 16 | 30709530 | 30755602 SRCAP    | 16974 | 100.00 |
| 16 | 30968615 | 30996437 SETD1A   | 29010 | 100.00 |
| 16 | 30996519 | 31000473 HSD3B7   | 18324 | 96.58  |
| 16 | 31000577 | 31021949 STX1B    | 18539 | 100.00 |
| 16 | 46723555 | 46732306 ORC6     | 17151 | 100.00 |
| 16 | 51169886 | 51185278 SALL1    | 10524 | 99.57  |
| 16 | 53631595 | 53737850 RPGRIP1L | 29168 | 100.00 |
| 16 | 53631595 | 53737850 RPGRIP1L | 29168 | 100.00 |
| 16 | 53631595 | 53737850 RPGRIP1L | 29168 | 100.00 |
| 16 | 54964774 | 54968397 IRX5     | 14361 | 100.00 |
| 16 | 56225302 | 56391356 GNAO1    | 4389  | 100.00 |
| 16 | 56500748 | 56554195 BBS2     | 967   | 100.00 |
| 16 | 57220049 | 57274387 RSPRY1   | 29420 | 100.00 |
| 16 | 57481337 | 57495187 COQ9     | 25302 | 99.59  |
| 16 | 57644564 | 57698944 ADGRG1   | 4512  | 100.00 |
| 16 | 58033450 | 58055522 USB1     | 25792 | 100.00 |
| 16 | 66541906 | 66586447 TK2      | 11831 | 95.86  |
| 16 | 67197288 | 67203848 HSF4     | 5227  | 100.00 |
| 16 | 67197288 | 67203848 HSF4     | 5227  | 100.00 |
| 16 | 67596310 | 67673086 CTCF     | 13723 | 98.40  |
| 16 | 68344877 | 68392466 PRMT7    | 25557 | 100.00 |



|    |          |          |          |       |            |
|----|----------|----------|----------|-------|------------|
| 16 | 68670092 | 68756519 | CDH3     | 1762  | 100.00     |
| 16 | 68670092 | 68756519 | CDH3     | 1762  | 100.00     |
| 16 | 68771128 | 68869451 | CDH1     | 1748  | 100.00     |
| 16 | 69354043 | 69373570 | COG8     | 18623 | 99.56      |
| 16 | 70286198 | 70323446 | AARS     | 20    | 99.46      |
| 16 | 70514471 | 70557468 | COG4     | 18620 | 100.00     |
| 16 | 70841281 | 71264625 | HYDIN    | 19368 | 99.74      |
| 16 | 71599563 | 71611033 | TAT      | 11573 | 100.00     |
| 16 | 72042487 | 72058954 | DHODH    | 2867  | 100.00     |
| 16 | 75661622 | 75682541 | KARS     | 6215  | 100.00     |
| 16 | 75661622 | 75682541 | KARS     | 6215  | 100.00     |
| 16 | 78133310 | 79246564 | WVOX     | 12799 | 100.00     |
| 16 | 78133310 | 79246564 | WVOX     | 12799 | 100.00     |
| 16 | 79619740 | 79634611 | MAF      | 6776  | 85.64      |
| 16 | 79619740 | 79634611 | MAF      | 6776  | 85.64      |
| 16 | 79619740 | 79634611 | MAF      | 6776  | 85.64      |
| 16 | 83932731 | 83949787 | MLYCD    | 7150  | 98.52      |
| 16 | 86544133 | 86548076 | FOXF1    | 3809  | 100.00     |
| 16 | 86600857 | 86602539 | FOXC2    | 3801  | 100.00     |
| 16 | 86600857 | 86602539 | FOXC2    | 3801  | 100.00     |
| 16 | 87921625 | 87970135 | CA5A     | 1377  | 95.64      |
| 16 | 88781751 | 88851619 | PIEZO1   | 28993 | 97.71      |
| 16 | 88869621 | 88875666 | CDT1     | 24576 | 98.29      |
| 16 | 88880142 | 88923378 | GALNS    | 4122  | 100.00     |
| 16 | 89334038 | 89556969 | ANKRD11  | 21316 | 95.51      |
| 16 | 89710839 | 89724253 | CHMP1A   | 8740  | 100.00     |
| 16 | 89803957 | 89883065 | FANCA    | 3582  | 100.00     |
| 16 | 89987800 | 90005169 | TUBB3    | 20772 | 100.00     |
| 16 | 89987800 | 90005169 | TUBB3    | 20772 | 100.00     |
| 16 | 90086037 | 90111383 | GAS8     | 4166  | 99.63      |
| 17 | 1173853  | 1174754  | BHLHA9   | 35126 | 66.81      |
| 17 | 1173853  | 1174754  | BHLHA9   | 35126 | 66.81      |
| 17 | 1397865  | 1420182  | INPP5K   | 33882 | 99.03      |
| 17 | 2496504  | 2588909  | PAFAH1B1 | 8574  | 92.15      |
| 17 | 2496504  | 2588909  | PAFAH1B1 | 8574  | 92.15      |
| 17 | 3375668  | 3406713  | ASPA     | 756   | 89.28      |
| 17 | 3413796  | 3461289  | TRPV3    | 18084 | 100.00     |
| 17 | 3539762  | 3564836  | CTNS     | 2518  | 100.00     |
| 17 | 3539762  | 3564836  | CTNS     | 2518  | 100.00     |
| 17 | 3539762  | 3564836  | CTNS     | 2518  | 100.00     |
| 17 | 5336097  | 5352150  | C1QBP    | 1243  | 76.98      |
| 17 | 6297013  | 6338519  | AIPL1    | 359   | 100.00     |
| 17 | 6588032  | 6616886  | SLC13A5  | 23089 | 100.00     |
| 17 | 7093209  | 7123021  | DLG4     | 2903  | 100.00     |
| 17 | 7120444  | 7128592  | ACADVL   | 92    | 99.71      |
| 17 | 7486847  | 7496107  | MPDU1    | 7207  | 100.00     |
| 17 | 7589389  | 7606820  | WRAP53   | 25522 | 100.00     |
| 17 | 8076772  | 8076905  | SNORD118 | 32952 | No protein |
| 17 | 8130191  | 8151362  | CTC1     | 26169 | 98.40      |
| 17 | 10293639 | 10325267 | MYH8     | 7578  | 98.35      |

|    |          |          |           |       |        |
|----|----------|----------|-----------|-------|--------|
| 17 | 10293639 | 10325267 | MYH8      | 7578  | 98.35  |
| 17 | 10531843 | 10560626 | MYH3      | 7573  | 98.66  |
| 17 | 10531843 | 10560626 | MYH3      | 7573  | 98.66  |
| 17 | 10583654 | 10601692 | SCO1      | 10603 | 94.59  |
| 17 | 12895708 | 12921504 | ELAC2     | 14198 | 100.00 |
| 17 | 13972813 | 14111994 | COX10     | 2260  | 99.79  |
| 17 | 13972813 | 14111994 | COX10     | 2260  | 99.79  |
| 17 | 15902694 | 15948329 | TTC19     | 26006 | 100.00 |
| 17 | 16120505 | 16252115 | PIGL      | 8966  | 100.00 |
| 17 | 16832849 | 16875432 | TNFRSF13B | 18153 | 100.00 |
| 17 | 17584787 | 17714767 | RAI1      | 9834  | 100.00 |
| 17 | 19240867 | 19281495 | B9D1      | 24123 | 100.00 |
| 17 | 19551449 | 19580911 | ALDH3A2   | 403   | 99.75  |
| 17 | 26721661 | 26734215 | SLC46A1   | 30521 | 98.99  |
| 17 | 26833261 | 26865914 | FOXN1     | 12765 | 99.74  |
| 17 | 27052915 | 27070473 | NEK8      | 13387 | 100.00 |
| 17 | 27052915 | 27070473 | NEK8      | 13387 | 100.00 |
| 17 | 27573881 | 27581512 | CRYBA1    | 2394  | 100.00 |
| 17 | 29295803 | 29326929 | RNF135    | 21158 | 97.69  |
| 17 | 29421945 | 29709134 | NF1       | 7765  | 81.99  |
| 17 | 29421945 | 29709134 | NF1       | 7765  | 81.99  |
| 17 | 29421945 | 29709134 | NF1       | 7765  | 81.99  |
| 17 | 29421945 | 29709134 | NF1       | 7765  | 81.99  |
| 17 | 33901814 | 33905882 | PEX12     | 8854  | 100.00 |
| 17 | 33901814 | 33905882 | PEX12     | 8854  | 100.00 |
| 17 | 36046435 | 36105237 | HNF1B     | 11630 | 96.06  |
| 17 | 36481413 | 36499730 | GPR179    | 31371 | 99.93  |
| 17 | 36890150 | 36906070 | PCGF2     | 12929 | 98.55  |
| 17 | 37827375 | 37853050 | PGAP3     | 23719 | 100.00 |
| 17 | 38214543 | 38250120 | THRA      | 11796 | 99.21  |
| 17 | 38443885 | 38459171 | CDC6      | 1744  | 100.00 |
| 17 | 38781214 | 38804760 | SMARCE1   | 11109 | 69.55  |
| 17 | 40086888 | 40117648 | TTC25     | 25280 | 62.53  |
| 17 | 40351186 | 40428725 | STAT5B    | 11367 | 98.98  |
| 17 | 40688190 | 40696467 | NAGLU     | 7632  | 94.89  |
| 17 | 40713485 | 40718295 | COASY     | 29932 | 100.00 |
| 17 | 40761694 | 40767252 | TUBG1     | 12417 | 100.00 |
| 17 | 40834631 | 40851832 | CNTNAP1   | 8011  | 100.00 |
| 17 | 41196312 | 41277500 | BRCA1     | 1100  | 100.00 |
| 17 | 41717756 | 41739322 | MEOX1     | 7013  | 100.00 |
| 17 | 42081914 | 42086431 | NAGS      | 17996 | 100.00 |
| 17 | 42282401 | 42298994 | UBTF      | 12511 | 100.00 |
| 17 | 42325753 | 42345509 | SLC4A1    | 11027 | 99.63  |
| 17 | 42325753 | 42345509 | SLC4A1    | 11027 | 99.63  |
| 17 | 42927311 | 42977030 | EFTUD2    | 30858 | 100.00 |
| 17 | 42976510 | 42982758 | CCDC103   | 32700 | 100.00 |
| 17 | 42982376 | 42994305 | GFAP      | 4235  | 98.01  |
| 17 | 44107282 | 44302733 | KANSL1    | 24565 | 97.81  |
| 17 | 44839872 | 44910520 | WNT3      | 12782 | 99.72  |
| 17 | 46605888 | 46608359 | HOXB1     | 5111  | 100.00 |

|    |          |          |          |       |        |
|----|----------|----------|----------|-------|--------|
| 17 | 48133332 | 48167845 | ITGA3    | 6139  | 100.00 |
| 17 | 48260650 | 48278993 | COL1A1   | 2197  | 93.52  |
| 17 | 48260650 | 48278993 | COL1A1   | 2197  | 93.52  |
| 17 | 48260650 | 48278993 | COL1A1   | 2197  | 93.52  |
| 17 | 48260650 | 48278993 | COL1A1   | 2197  | 93.52  |
| 17 | 48260650 | 48278993 | COL1A1   | 2197  | 93.52  |
| 17 | 48260650 | 48278993 | COL1A1   | 2197  | 93.52  |
| 17 | 48260650 | 48278993 | COL1A1   | 2197  | 93.52  |
| 17 | 48260650 | 48278993 | COL1A1   | 2197  | 93.52  |
| 17 | 48423453 | 48440499 | XYLT2    | 15517 | 98.97  |
| 17 | 54671060 | 54672951 | NOG      | 7866  | 100.00 |
| 17 | 54671060 | 54672951 | NOG      | 7866  | 100.00 |
| 17 | 54671060 | 54672951 | NOG      | 7866  | 100.00 |
| 17 | 54671060 | 54672951 | NOG      | 7866  | 100.00 |
| 17 | 54671060 | 54672951 | NOG      | 7866  | 100.00 |
| 17 | 56282803 | 56296966 | MKS1     | 7121  | 97.98  |
| 17 | 56282803 | 56296966 | MKS1     | 7121  | 97.98  |
| 17 | 56769934 | 56811703 | RAD51C   | 9820  | 100.00 |
| 17 | 57059999 | 57184282 | TRIM37   | 7523  | 100.00 |
| 17 | 57697219 | 57773671 | CLTC     | 2092  | 100.00 |
| 17 | 58677544 | 58741849 | PPM1D    | 9277  | 99.23  |
| 17 | 59529765 | 59562471 | TBX4     | 11603 | 97.86  |
| 17 | 59758627 | 59940882 | BRIP1    | 20473 | 98.47  |
| 17 | 61678231 | 61685725 | TACO1    | 24316 | 89.93  |
| 17 | 62015914 | 62050278 | SCN4A    | 10591 | 100.00 |
| 17 | 62015914 | 62050278 | SCN4A    | 10591 | 100.00 |
| 17 | 62015914 | 62050278 | SCN4A    | 10591 | 100.00 |
| 17 | 65821640 | 65980494 | BPTF     | 3581  | 94.99  |
| 17 | 66507921 | 66547460 | PRKAR1A  | 9388  | 68.95  |
| 17 | 66531254 | 66597530 | FAM20A   | 23015 | 100.00 |
| 17 | 70117161 | 70122561 | SOX9     | 11204 | 100.00 |
| 17 | 70117161 | 70122561 | SOX9     | 11204 | 100.00 |
| 17 | 71189129 | 71204646 | COG1     | 6545  | 100.00 |
| 17 | 73269073 | 73285591 | SLC25A19 | 14409 | 92.90  |
| 17 | 73512141 | 73520820 | TSEN54   | 27561 | 93.25  |
| 17 | 73747675 | 73761792 | GALK1    | 4118  | 98.98  |
| 17 | 73937588 | 73975515 | ACOX1    | 119   | 100.00 |
| 17 | 78010435 | 78074412 | CCDC40   | 26090 | 100.00 |
| 17 | 78075355 | 78093678 | GAA      | 4065  | 100.00 |
| 17 | 78109013 | 78120982 | EIF4A3   | 18683 | 100.00 |
| 17 | 78180515 | 78194722 | SGSH     | 10818 | 94.17  |
| 17 | 79476997 | 79490873 | ACTG1    | 144   | 100.00 |
| 17 | 79617489 | 79630142 | PDE6G    | 8789  | 100.00 |
| 17 | 79801035 | 79818570 | P4HB     | 8548  | 100.00 |
| 17 | 79890260 | 79900288 | PYCR1    | 9721  | 90.34  |
| 17 | 80709940 | 80900724 | TBCD     | 11581 | 97.85  |
| 17 | 80787311 | 80798454 | ZNF750   | 25843 | 100.00 |
| 18 | 2655737  | 2805015  | SMCHD1   | 29090 | 97.03  |
| 18 | 3411606  | 3458409  | TGIF1    | 11776 | 100.00 |
| 18 | 6941743  | 7117813  | LAMA1    | 6481  | 97.80  |

|    |          |          |          |       |        |
|----|----------|----------|----------|-------|--------|
| 18 | 6941743  | 7117813  | LAMA1    | 6481  | 97.80  |
| 18 | 10666480 | 11148587 | PIEZO2   | 26270 | 100.00 |
| 18 | 10666480 | 11148587 | PIEZO2   | 26270 | 100.00 |
| 18 | 13882043 | 13915706 | MC2R     | 6930  | 95.97  |
| 18 | 19749404 | 19782491 | GATA6    | 4174  | 81.88  |
| 18 | 19749404 | 19782491 | GATA6    | 4174  | 81.88  |
| 18 | 19749404 | 19782491 | GATA6    | 4174  | 81.88  |
| 18 | 21086148 | 21166862 | NPC1     | 7897  | 100.00 |
| 18 | 24034874 | 24237365 | KCTD1    | 18249 | 100.00 |
| 18 | 28898052 | 28936992 | DSG1     | 3048  | 97.59  |
| 18 | 31158579 | 31331156 | ASXL3    | 29357 | 99.61  |
| 18 | 32556892 | 32723434 | MAPRE2   | 6891  | 98.88  |
| 18 | 42260138 | 42648475 | SETBP1   | 15573 | 97.03  |
| 18 | 42260138 | 42648475 | SETBP1   | 15573 | 97.03  |
| 18 | 43427574 | 43547240 | EPG5     | 29331 | 97.95  |
| 18 | 46570039 | 46987717 | DYM      | 21317 | 100.00 |
| 18 | 46570039 | 46987717 | DYM      | 21317 | 100.00 |
| 18 | 47349183 | 47721463 | MYO5B    | 7603  | 93.01  |
| 18 | 48494410 | 48611415 | SMAD4    | 6770  | 100.00 |
| 18 | 48494410 | 48611415 | SMAD4    | 6770  | 100.00 |
| 18 | 48494410 | 48611415 | SMAD4    | 6770  | 100.00 |
| 18 | 49866542 | 51057784 | DCC      | 2701  | 100.00 |
| 18 | 52889562 | 53332018 | TCF4     | 11634 | 99.96  |
| 18 | 55313658 | 55470333 | ATP8B1   | 3706  | 99.25  |
| 18 | 56934267 | 56941318 | RAX      | 18662 | 100.00 |
| 18 | 57098172 | 57364612 | CCBE1    | 29426 | 100.00 |
| 18 | 59710800 | 59854351 | PIGN     | 8967  | 99.31  |
| 18 | 67671029 | 67873181 | RTTN     | 18654 | 100.00 |
| 18 | 77439801 | 77514510 | CTDP1    | 2498  | 99.48  |
| 18 | 77732867 | 77793949 | TXNL4A   | 30551 | 100.00 |
| 19 | 1103936  | 1106787  | GPX4     | 4556  | 85.86  |
| 19 | 1383526  | 1395583  | NDUFS7   | 7714  | 98.91  |
| 19 | 1397091  | 1401569  | GAMT     | 4136  | 99.14  |
| 19 | 3094408  | 3124002  | GNA11    | 4379  | 100.00 |
| 19 | 4090319  | 4124126  | MAP2K2   | 6842  | 96.59  |
| 19 | 5691845  | 5720583  | LONP1    | 9479  | 100.00 |
| 19 | 6361463  | 6368919  | CLPP     | 2084  | 95.92  |
| 19 | 6494330  | 6502859  | TUBB4A   | 20774 | 100.00 |
| 19 | 7587512  | 7598895  | MCOLN1   | 13356 | 99.52  |
| 19 | 7694623  | 7696842  | PET100   | 40038 | 100.00 |
| 19 | 8454865  | 8469318  | RAB11B   | 9761  | 100.00 |
| 19 | 11071598 | 11176071 | SMARCA4  | 11100 | 100.00 |
| 19 | 11071598 | 11176071 | SMARCA4  | 11100 | 100.00 |
| 19 | 11309971 | 11373157 | DOCK6    | 19189 | 100.00 |
| 19 | 11531272 | 11546603 | CCDC151  | 28303 | 99.44  |
| 19 | 11685475 | 11689823 | ACP5     | 124   | 97.24  |
| 19 | 12757325 | 12777556 | MAN2B1   | 6826  | 96.48  |
| 19 | 12917394 | 12924452 | RNASEH2A | 18518 | 100.00 |
| 19 | 12995237 | 12997995 | KLF1     | 6345  | 100.00 |
| 19 | 13001840 | 13025021 | GCDH     | 4189  | 99.58  |

|    |          |          |         |       |        |
|----|----------|----------|---------|-------|--------|
| 19 | 13106422 | 13209610 | NFIX    | 7788  | 100.00 |
| 19 | 13106422 | 13209610 | NFIX    | 7788  | 100.00 |
| 19 | 13228917 | 13251955 | NACC1   | 20967 | 100.00 |
| 19 | 14017014 | 14041692 | CC2D1A  | 30237 | 100.00 |
| 19 | 17003758 | 17137625 | CPAMD8  | 23228 | 97.55  |
| 19 | 17445729 | 17453544 | GTPBP3  | 14880 | 100.00 |
| 19 | 17935589 | 17958880 | JAK3    | 6193  | 92.16  |
| 19 | 17982782 | 18005983 | SLC5A5  | 11040 | 99.90  |
| 19 | 18263928 | 18281350 | PIK3R2  | 8980  | 99.17  |
| 19 | 18893583 | 18902123 | COMP    | 2227  | 92.39  |
| 19 | 18893583 | 18902123 | COMP    | 2227  | 92.39  |
| 19 | 33877856 | 34012700 | PEPD    | 8840  | 98.88  |
| 19 | 35521588 | 35531352 | SCN1B   | 10586 | 96.90  |
| 19 | 35521588 | 35531352 | SCN1B   | 10586 | 96.90  |
| 19 | 35615417 | 35633355 | LG14    | 18712 | 96.63  |
| 19 | 36139125 | 36149763 | COX6B1  | 2280  | 100.00 |
| 19 | 36208921 | 36229779 | KMT2B   | 15840 | 92.62  |
| 19 | 36316866 | 36360189 | NPHS1   | 7908  | 100.00 |
| 19 | 36486090 | 36487220 | SDHAF1  | 33867 | 100.00 |
| 19 | 36545783 | 36596008 | WDR62   | 24502 | 100.00 |
| 19 | 38924339 | 39078204 | RYR1    | 10483 | 100.00 |
| 19 | 39989535 | 39999121 | DLL3    | 2909  | 92.14  |
| 19 | 41807492 | 41859816 | TGFB1   | 11766 | 100.00 |
| 19 | 41884215 | 41930910 | BCKDHA  | 986   | 99.40  |
| 19 | 42363988 | 42376994 | RPS19   | 10402 | 100.00 |
| 19 | 42470734 | 42501649 | ATP1A3  | 801   | 100.00 |
| 19 | 42470734 | 42501649 | ATP1A3  | 801   | 100.00 |
| 19 | 42751724 | 42759309 | ERF     | 3444  | 100.00 |
| 19 | 42751724 | 42759309 | ERF     | 3444  | 100.00 |
| 19 | 42829761 | 42882921 | MEGF8   | 3233  | 98.88  |
| 19 | 44010871 | 44031396 | ETHE1   | 23287 | 100.00 |
| 19 | 44235301 | 44259142 | SMG9    | 25763 | 100.00 |
| 19 | 45853095 | 45874176 | ERCC2   | 3434  | 100.00 |
| 19 | 45853095 | 45874176 | ERCC2   | 3434  | 100.00 |
| 19 | 45853095 | 45874176 | ERCC2   | 3434  | 100.00 |
| 19 | 45910591 | 45982086 | ERCC1   | 3433  | 100.00 |
| 19 | 45910591 | 45982086 | ERCC1   | 3433  | 100.00 |
| 19 | 46268043 | 46272484 | SIX5    | 10891 | 100.00 |
| 19 | 46272975 | 46285810 | DMPK    | 2933  | 100.00 |
| 19 | 46913629 | 46916841 | CCDC8   | 25367 | 100.00 |
| 19 | 47249303 | 47280245 | FKRP    | 17997 | 100.00 |
| 19 | 47249303 | 47280245 | FKRP    | 17997 | 100.00 |
| 19 | 47249303 | 47280245 | FKRP    | 17997 | 100.00 |
| 19 | 47978401 | 47987525 | KPTN    | 6404  | 100.00 |
| 19 | 48322703 | 48346587 | CRX     | 2383  | 100.00 |
| 19 | 48799714 | 48825151 | CCDC114 | 26560 | 100.00 |
| 19 | 48898132 | 48948188 | GRIN2D  | 4588  | 64.82  |
| 19 | 49468558 | 49470135 | FTL     | 3999  | 93.37  |
| 19 | 50138549 | 50143458 | RRAS    | 10447 | 98.78  |
| 19 | 50364461 | 50371166 | PNKP    | 9154  | 100.00 |

|    |          |          |         |       |        |
|----|----------|----------|---------|-------|--------|
| 19 | 50364461 | 50371166 | PNKP    | 9154  | 100.00 |
| 19 | 50410082 | 50433020 | NUP62   | 8066  | 100.00 |
| 19 | 50815194 | 50836772 | KCNC3   | 6235  | 73.92  |
| 19 | 50887461 | 50921273 | POLD1   | 9175  | 78.87  |
| 19 | 51165084 | 51222707 | SHANK1  | 15474 | 100.00 |
| 19 | 51848423 | 51869672 | ETFB    | 3482  | 100.00 |
| 19 | 52693292 | 52730687 | PPP2R1A | 9302  | 99.27  |
| 19 | 54641444 | 54659419 | CNOT3   | 7879  | 100.00 |
| 19 | 54677107 | 54693733 | MBOAT7  | 15505 | 98.17  |
| 19 | 54693789 | 54697585 | TSEN34  | 15506 | 89.82  |
| 19 | 55670031 | 55678090 | DNAAF3  | 30492 | 100.00 |
| 20 | 416124   | 443197   | TBC1D20 | 16133 | 99.91  |
| 20 | 459116   | 524465   | CSNK2A1 | 2457  | 99.83  |
| 20 | 740724   | 749131   | SLC52A3 | 16187 | 100.00 |
| 20 | 939095   | 982907   | RSPO4   | 16175 | 100.00 |
| 20 | 2442280  | 2451499  | SNRPB   | 11153 | 97.93  |
| 20 | 3208063  | 3219836  | SLC4A11 | 16438 | 100.00 |
| 20 | 6748311  | 6760927  | BMP2    | 1069  | 100.00 |
| 20 | 8112824  | 8949003  | PLCB1   | 15917 | 100.00 |
| 20 | 9049410  | 9461889  | PLCB4   | 9059  | 100.00 |
| 20 | 10199478 | 10288066 | SNAP25  | 11132 | 100.00 |
| 20 | 10381657 | 10414870 | MKKS    | 7108  | 100.00 |
| 20 | 10381657 | 10414870 | MKKS    | 7108  | 100.00 |
| 20 | 10618332 | 10654694 | JAG1    | 6188  | 97.82  |
| 20 | 18488137 | 18542059 | SEC23B  | 10702 | 100.00 |
| 20 | 19867165 | 19983101 | RIN2    | 18750 | 99.49  |
| 20 | 23342787 | 23353700 | GZF1    | 15808 | 99.81  |
| 20 | 30946155 | 31027122 | ASXL1   | 18318 | 99.01  |
| 20 | 31350191 | 31397162 | DNMT3B  | 2979  | 100.00 |
| 20 | 32951041 | 33099198 | ITCH    | 13890 | 93.16  |
| 20 | 34021145 | 34042568 | GDF5    | 4220  | 100.00 |
| 20 | 34021145 | 34042568 | GDF5    | 4220  | 100.00 |
| 20 | 34021145 | 34042568 | GDF5    | 4220  | 100.00 |
| 20 | 34021145 | 34042568 | GDF5    | 4220  | 100.00 |
| 20 | 34021145 | 34042568 | GDF5    | 4220  | 100.00 |
| 20 | 34021145 | 34042568 | GDF5    | 4220  | 100.00 |
| 20 | 34021145 | 34042568 | GDF5    | 4220  | 100.00 |
| 20 | 34021145 | 34042568 | GDF5    | 4220  | 100.00 |
| 20 | 34021145 | 34042568 | GDF5    | 4220  | 100.00 |
| 20 | 35518632 | 35580246 | SAMHD1  | 15925 | 100.00 |
| 20 | 39314488 | 39317880 | MAFB    | 6408  | 100.00 |
| 20 | 39314488 | 39317880 | MAFB    | 6408  | 100.00 |
| 20 | 42984340 | 43061485 | HNF4A   | 5024  | 97.47  |
| 20 | 42984340 | 43061485 | HNF4A   | 5024  | 97.47  |
| 20 | 43248163 | 43280874 | ADA     | 186   | 100.00 |
| 20 | 44044717 | 44054884 | PIGT    | 14938 | 100.00 |
| 20 | 44518783 | 44527459 | CTSA    | 9251  | 100.00 |
| 20 | 44994688 | 45061704 | ELMO2   | 17233 | 100.00 |
| 20 | 45338126 | 45364965 | SLC2A10 | 13444 | 100.00 |
| 20 | 47538427 | 47653230 | ARFGEF2 | 15853 | 100.00 |
| 20 | 47980414 | 48099184 | KCNB1   | 6231  | 99.57  |

|    |          |          |         |       |        |
|----|----------|----------|---------|-------|--------|
| 20 | 49505585 | 49547958 | ADNP    | 15766 | 100.00 |
| 20 | 49551404 | 49575092 | DPM1    | 3005  | 96.17  |
| 20 | 50400581 | 50419059 | SALL4   | 15924 | 97.41  |
| 20 | 50400581 | 50419059 | SALL4   | 15924 | 97.41  |
| 20 | 57414773 | 57486247 | GNAS    | 4392  | 100.00 |
| 20 | 57414773 | 57486247 | GNAS    | 4392  | 100.00 |
| 20 | 57414773 | 57486247 | GNAS    | 4392  | 100.00 |
| 20 | 57414773 | 57486247 | GNAS    | 4392  | 100.00 |
| 20 | 61447596 | 61472511 | COL9A3  | 2219  | 97.68  |
| 20 | 61975420 | 62009753 | CHRNA4  | 1958  | 94.61  |
| 20 | 62037542 | 62103993 | KCNQ2   | 6296  | 100.00 |
| 20 | 62037542 | 62103993 | KCNQ2   | 6296  | 100.00 |
| 20 | 62119366 | 62130505 | EEF1A2  | 3192  | 100.00 |
| 20 | 62289163 | 62328416 | RTEL1   | 15888 | 85.21  |
| 20 | 62289163 | 62328416 | RTEL1   | 15888 | 85.21  |
| 21 | 33964389 | 33985176 | CFAP298 | 1301  | 100.00 |
| 21 | 34914924 | 34949812 | SON     | 11183 | 94.93  |
| 21 | 35818988 | 35884573 | KCNE1   | 6240  | 100.00 |
| 21 | 38123189 | 38362536 | HLCS    | 4976  | 100.00 |
| 21 | 38738092 | 38889753 | DYRK1A  | 3091  | 100.00 |
| 21 | 38979678 | 39288749 | KCNJ6   | 6267  | 100.00 |
| 21 | 43159529 | 43187266 | RIPK4   | 496   | 100.00 |
| 21 | 43892596 | 43916464 | RSPH1   | 12371 | 100.00 |
| 21 | 44473301 | 44497053 | CBS     | 1550  | 92.24  |
| 21 | 44589118 | 44592915 | CRYAA   | 2388  | 100.00 |
| 21 | 44589118 | 44592915 | CRYAA   | 2388  | 100.00 |
| 21 | 44834395 | 44847008 | SIK1    | 11142 | 100.00 |
| 21 | 45192393 | 45196326 | CSTB    | 2482  | 100.00 |
| 21 | 45705721 | 45718531 | AIRE    | 360   | 100.00 |
| 21 | 45748827 | 45759285 | C21orf2 | 1260  | 98.14  |
| 21 | 46825052 | 46933634 | COL18A1 | 2195  | 84.25  |
| 21 | 47401651 | 47424964 | COL6A1  | 2211  | 100.00 |
| 21 | 47556176 | 47575481 | FTCD    | 3974  | 100.00 |
| 21 | 47744036 | 47865682 | PCNT    | 16068 | 96.44  |
| 22 | 18560689 | 18613905 | PEX26   | 22965 | 100.00 |
| 22 | 18560689 | 18613905 | PEX26   | 22965 | 100.00 |
| 22 | 18560689 | 18613905 | PEX26   | 22965 | 100.00 |
| 22 | 18560689 | 18613905 | PEX26   | 22965 | 100.00 |
| 22 | 18593097 | 18629321 | TUBA8   | 12410 | 99.93  |
| 22 | 18632666 | 18660164 | USP18   | 12616 | 95.89  |
| 22 | 19466982 | 19508135 | CDC45   | 1739  | 94.64  |
| 22 | 19744226 | 19771116 | TBX1    | 11592 | 82.53  |
| 22 | 20004537 | 20053449 | TANGO2  | 25439 | 100.00 |
| 22 | 20778874 | 20792146 | SCARF2  | 19869 | 98.42  |
| 22 | 21213271 | 21245506 | SNAP29  | 11133 | 100.00 |
| 22 | 24129150 | 24176703 | SMARCB1 | 11103 | 100.00 |
| 22 | 24129150 | 24176703 | SMARCB1 | 11103 | 100.00 |
| 22 | 24666786 | 24813708 | SPECC1L | 29022 | 99.52  |
| 22 | 25595817 | 25603330 | CRYBB3  | 2400  | 100.00 |
| 22 | 25615489 | 25627836 | CRYBB2  | 2398  | 100.00 |

|    |          |          |         |       |            |
|----|----------|----------|---------|-------|------------|
| 22 | 25615489 | 25627836 | CRYBB2  | 2398  | 100.00     |
| 22 | 26995242 | 27014052 | CRYBB1  | 2397  | 98.55      |
| 22 | 26995242 | 27014052 | CRYBB1  | 2397  | 98.55      |
| 22 | 27017928 | 27026636 | CRYBA4  | 2396  | 100.00     |
| 22 | 31002825 | 31023265 | TCN2    | 11653 | 100.00     |
| 22 | 32149944 | 32303012 | DEPDC5  | 18423 | 100.00     |
| 22 | 33558212 | 34318829 | LARGE1  | 6511  | 98.77      |
| 22 | 33558212 | 34318829 | LARGE1  | 6511  | 98.77      |
| 22 | 36677327 | 36784063 | MYH9    | 7579  | 99.42      |
| 22 | 36677327 | 36784063 | MYH9    | 7579  | 99.42      |
| 22 | 36677327 | 36784063 | MYH9    | 7579  | 99.42      |
| 22 | 36677327 | 36784063 | MYH9    | 7579  | 99.42      |
| 22 | 36677327 | 36784063 | MYH9    | 7579  | 99.42      |
| 22 | 36677327 | 36784063 | MYH9    | 7579  | 99.42      |
| 22 | 37461476 | 37505603 | TMPRSS6 | 16517 | 100.00     |
| 22 | 38366693 | 38383429 | SOX10   | 11190 | 100.00     |
| 22 | 38366693 | 38383429 | SOX10   | 11190 | 100.00     |
| 22 | 38366693 | 38383429 | SOX10   | 11190 | 100.00     |
| 22 | 38366693 | 38383429 | SOX10   | 11190 | 100.00     |
| 22 | 38366693 | 38383429 | SOX10   | 11190 | 100.00     |
| 22 | 38507502 | 38601697 | PLA2G6  | 9039  | 98.64      |
| 22 | 38507502 | 38601697 | PLA2G6  | 9039  | 98.64      |
| 22 | 40742507 | 40786467 | ADSL    | 291   | 100.00     |
| 22 | 41487790 | 41576081 | EP300   | 3373  | 98.30      |
| 22 | 41865129 | 41924993 | ACO2    | 118   | 87.75      |
| 22 | 42454358 | 42466846 | NAGA    | 7631  | 100.00     |
| 22 | 42454358 | 42466846 | NAGA    | 7631  | 100.00     |
| 22 | 42556019 | 42739622 | TCF20   | 11631 | 100.00     |
| 22 | 43013846 | 43045574 | CYB5R3  | 2873  | 100.00     |
| 22 | 50293877 | 50312106 | ALG12   | 19358 | 100.00     |
| 22 | 50497820 | 50524331 | MLC1    | 17082 | 100.00     |
| 22 | 50656118 | 50683421 | TUBGCP6 | 18127 | 100.00     |
| 22 | 50961997 | 50964868 | SCO2    | 10604 | 100.00     |
| 22 | 51061182 | 51066607 | ARSA    | 713   | 100.00     |
| 22 | 51112843 | 51171726 | SHANK3  | 14294 | 93.31      |
| M  | 15956    | 16023    | MT-TP   | 7494  | No protein |
| X  | 585079   | 620146   | SHOX    | 10853 | 91.35      |
| X  | 585079   | 620146   | SHOX    | 10853 | 91.35      |
| X  | 2852699  | 2886286  | ARSE    | 719   | 99.18      |
| X  | 7137497  | 7272851  | STS     | 11425 | 94.37      |
| X  | 10413350 | 10851773 | MID1    | 7095  | 99.74      |
| X  | 11129421 | 11141198 | HCCS    | 4837  | 94.67      |
| X  | 11776278 | 11793870 | MSL3    | 7370  | 76.88      |
| X  | 12156585 | 12742642 | FRMPD4  | 29007 | 98.37      |
| X  | 13730363 | 13752754 | TRAPPC2 | 23068 | 68.76      |
| X  | 13752832 | 13787480 | OFD1    | 2567  | 52.67      |
| X  | 13752832 | 13787480 | OFD1    | 2567  | 52.67      |
| X  | 13752832 | 13787480 | OFD1    | 2567  | 52.67      |
| X  | 14861529 | 14891191 | FANCB   | 3583  | 96.86      |
| X  | 15337573 | 15353676 | PIGA    | 8957  | 85.77      |



|   |          |          |          |       |        |
|---|----------|----------|----------|-------|--------|
| X | 15843929 | 15873054 | AP1S2    | 560   | 68.35  |
| X | 17393543 | 17754114 | NHS      | 7820  | 94.60  |
| X | 17393543 | 17754114 | NHS      | 7820  | 94.60  |
| X | 18443703 | 18671749 | CDKL5    | 11411 | 99.74  |
| X | 19362011 | 19379823 | PDHA1    | 8806  | 95.12  |
| X | 19362011 | 19379823 | PDHA1    | 8806  | 95.12  |
| X | 19362011 | 19379823 | PDHA1    | 8806  | 95.12  |
| X | 20168029 | 20285523 | RPS6KA3  | 10432 | 97.26  |
| X | 20168029 | 20285523 | RPS6KA3  | 10432 | 97.26  |
| X | 21392536 | 21672813 | CNKSR2   | 19701 | 92.32  |
| X | 21958691 | 22025798 | SMS      | 11123 | 67.85  |
| X | 23352133 | 23422489 | PTCHD1   | 26392 | 100.00 |
| X | 24072833 | 24096088 | EIF2S3   | 3267  | 86.08  |
| X | 25021811 | 25034065 | ARX      | 18060 | 100.00 |
| X | 25021811 | 25034065 | ARX      | 18060 | 100.00 |
| X | 25021811 | 25034065 | ARX      | 18060 | 100.00 |
| X | 25021811 | 25034065 | ARX      | 18060 | 100.00 |
| X | 25021811 | 25034065 | ARX      | 18060 | 100.00 |
| X | 28605516 | 29974840 | IL1RAPL1 | 5996  | 97.00  |
| X | 30671476 | 30748725 | GK       | 4289  | 52.83  |
| X | 38211798 | 38280703 | OTC      | 8512  | 100.00 |
| X | 38420623 | 38548169 | TSPAN7   | 11854 | 100.00 |
| X | 39909068 | 40036582 | BCOR     | 20893 | 97.85  |
| X | 40944888 | 41095832 | USP9X    | 12632 | 96.39  |
| X | 40944888 | 41095832 | USP9X    | 12632 | 96.39  |
| X | 41192651 | 41223725 | DDX3X    | 2745  | 96.22  |
| X | 41192651 | 41223725 | DDX3X    | 2745  | 96.22  |
| X | 41306687 | 41334963 | NYX      | 8082  | 96.40  |
| X | 41374187 | 41782716 | CASK     | 1497  | 95.02  |
| X | 41374187 | 41782716 | CASK     | 1497  | 95.02  |
| X | 41374187 | 41782716 | CASK     | 1497  | 95.02  |
| X | 43515467 | 43606068 | MAOA     | 6833  | 100.00 |
| X | 43808022 | 43832750 | NDP      | 7678  | 100.00 |
| X | 44732757 | 44971847 | KDM6A    | 12637 | 79.25  |
| X | 47001615 | 47004903 | NDUFB11  | 20372 | 92.68  |
| X | 47004268 | 47046212 | RBM10    | 9896  | 98.50  |
| X | 47431303 | 47479252 | SYN1     | 11494 | 100.00 |
| X | 48334541 | 48344752 | FTSJ1    | 13254 | 94.04  |
| X | 48367350 | 48379202 | PORCN    | 17652 | 100.00 |
| X | 48379546 | 48387104 | EBP      | 3133  | 94.37  |
| X | 48755195 | 48760420 | PQBP1    | 9330  | 100.00 |
| X | 48760459 | 48769235 | SLC35A2  | 11022 | 96.31  |
| X | 48929385 | 48958108 | WDR45    | 28912 | 91.16  |
| X | 49044269 | 49056718 | SYP      | 11506 | 99.79  |
| X | 49091927 | 49106987 | CCDC22   | 28909 | 96.13  |
| X | 49106897 | 49121288 | FOXP3    | 6106  | 95.37  |
| X | 49644470 | 49647166 | USP27X   | 13486 | 100.00 |
| X | 51486481 | 51489324 | GSPT2    | 4622  | 100.00 |
| X | 53220503 | 53254604 | KDM5C    | 11114 | 98.48  |
| X | 53262058 | 53350522 | IQSEC2   | 29059 | 95.07  |

|   |           |           |          |       |        |
|---|-----------|-----------|----------|-------|--------|
| X | 53401070  | 53449677  | SMC1A    | 11111 | 99.84  |
| X | 53458206  | 53461320  | HSD17B10 | 4800  | 98.09  |
| X | 53458206  | 53461320  | HSD17B10 | 4800  | 98.09  |
| X | 53559057  | 53713673  | HUWE1    | 30892 | 96.42  |
| X | 53963109  | 54075391  | PHF8     | 20672 | 97.36  |
| X | 54471887  | 54522599  | FGD1     | 3663  | 95.42  |
| X | 63404997  | 63425624  | AMER1    | 26837 | 99.65  |
| X | 64136250  | 64254593  | ZC4H2    | 24931 | 100.00 |
| X | 64136250  | 64254593  | ZC4H2    | 24931 | 100.00 |
| X | 66764465  | 66950461  | AR       | 644   | 99.70  |
| X | 66764465  | 66950461  | AR       | 644   | 99.70  |
| X | 67262186  | 67653755  | OPHN1    | 8148  | 99.41  |
| X | 68048840  | 68061990  | EFNB1    | 3226  | 100.00 |
| X | 68835911  | 69259319  | EDA      | 3157  | 100.00 |
| X | 68835911  | 69259319  | EDA      | 3157  | 100.00 |
| X | 69664711  | 69725337  | DLG3     | 2902  | 100.00 |
| X | 70338406  | 70362303  | MED12    | 11957 | 94.89  |
| X | 70338406  | 70362303  | MED12    | 11957 | 94.89  |
| X | 70503042  | 70521018  | NONO     | 7871  | 95.48  |
| X | 70586114  | 70752224  | TAF1     | 11535 | 95.68  |
| X | 71549366  | 71792953  | HDAC8    | 13315 | 100.00 |
| X | 71549366  | 71792953  | HDAC8    | 13315 | 100.00 |
| X | 71549366  | 71792953  | HDAC8    | 13315 | 100.00 |
| X | 73641085  | 73753752  | SLC16A2  | 10923 | 92.96  |
| X | 73805052  | 73834452  | RLIM     | 13429 | 100.00 |
| X | 73952684  | 74145282  | NEXMIF   | 29433 | 100.00 |
| X | 73952684  | 74145282  | NEXMIF   | 29433 | 100.00 |
| X | 74273115  | 74376567  | ABCB7    | 48    | 96.93  |
| X | 76760356  | 77041702  | ATRX     | 886   | 95.55  |
| X | 76760356  | 77041702  | ATRX     | 886   | 95.55  |
| X | 77154935  | 77162870  | COX7B    | 2291  | 16.46  |
| X | 77166194  | 77305892  | ATP7A    | 869   | 97.60  |
| X | 77166194  | 77305892  | ATP7A    | 869   | 97.60  |
| X | 77166194  | 77305892  | ATP7A    | 869   | 97.60  |
| X | 77320685  | 77384793  | PGK1     | 8896  | 70.65  |
| X | 79270255  | 79287268  | TBX22    | 11600 | 95.84  |
| X | 79926353  | 80065187  | BRWD3    | 17342 | 91.36  |
| X | 84498997  | 84528368  | ZNF711   | 13128 | 98.73  |
| X | 99546642  | 99665271  | PCDH19   | 14270 | 99.62  |
| X | 99899215  | 99926296  | SRPX2    | 30668 | 97.44  |
| X | 99899215  | 99926296  | SRPX2    | 30668 | 97.44  |
| X | 100600649 | 100604184 | TIMM8A   | 11817 | 76.87  |
| X | 100600649 | 100604184 | TIMM8A   | 11817 | 76.87  |
| X | 100663283 | 100669121 | HNRNPH2  | 5042  | 100.00 |
| X | 103028647 | 103047548 | PLP1     | 9086  | 99.28  |
| X | 103028647 | 103047548 | PLP1     | 9086  | 99.28  |
| X | 106871737 | 106894256 | PRPS1    | 9462  | 100.00 |
| X | 106871737 | 106894256 | PRPS1    | 9462  | 100.00 |
| X | 106871737 | 106894256 | PRPS1    | 9462  | 100.00 |
| X | 106871737 | 106894256 | PRPS1    | 9462  | 100.00 |

|   |           |           |        |       |        |
|---|-----------|-----------|--------|-------|--------|
| X | 108867473 | 108976632 | ACSL4  | 3571  | 89.50  |
| X | 108867473 | 108976632 | ACSL4  | 3571  | 89.50  |
| X | 109917084 | 110039286 | CHRD1  | 29861 | 100.00 |
| X | 110187513 | 110470589 | PAK3   | 8592  | 76.84  |
| X | 110187513 | 110470589 | PAK3   | 8592  | 76.84  |
| X | 110537007 | 110655603 | DCX    | 2714  | 100.00 |
| X | 110537007 | 110655603 | DCX    | 2714  | 100.00 |
| X | 110909043 | 111003877 | ALG13  | 30881 | 93.00  |
| X | 110909043 | 111003877 | ALG13  | 30881 | 93.00  |
| X | 110909043 | 111003877 | ALG13  | 30881 | 93.00  |
| X | 110909043 | 111003877 | ALG13  | 30881 | 93.00  |
| X | 118708501 | 118718381 | UBE2A  | 12472 | 96.08  |
| X | 118967985 | 118986961 | UPF3B  | 20439 | 93.38  |
| X | 119005450 | 119010625 | NDUFA1 | 7683  | 100.00 |
| X | 119561682 | 119603220 | LAMP2  | 6501  | 88.83  |
| X | 119658464 | 119709649 | CUL4B  | 2555  | 86.33  |
| X | 122318006 | 122624766 | GRIA3  | 4573  | 93.01  |
| X | 122734412 | 122866906 | THOC2  | 19073 | 90.72  |
| X | 128673826 | 128726538 | OCRL   | 8108  | 100.00 |
| X | 128673826 | 128726538 | OCRL   | 8108  | 100.00 |
| X | 128937264 | 128977885 | ZDHHC9 | 18475 | 96.57  |
| X | 129263337 | 129299861 | AIFM1  | 8768  | 100.00 |
| X | 129263337 | 129299861 | AIFM1  | 8768  | 100.00 |
| X | 130407480 | 130533677 | IGSF1  | 5948  | 98.24  |
| X | 131211021 | 131262048 | FRMD7  | 8079  | 100.00 |
| X | 132669773 | 133119922 | GPC3   | 4451  | 94.92  |
| X | 133507283 | 133562820 | PHF6   | 18145 | 78.97  |
| X | 133594183 | 133654543 | HPRT1  | 5157  | 93.15  |
| X | 133594183 | 133654543 | HPRT1  | 5157  | 93.15  |
| X | 135067598 | 135129423 | SLC9A6 | 11079 | 93.40  |
| X | 135229559 | 135293518 | FHL1   | 3702  | 95.68  |
| X | 136648301 | 136659850 | ZIC3   | 12874 | 100.00 |
| X | 136648301 | 136659850 | ZIC3   | 12874 | 100.00 |
| X | 139585152 | 139587225 | SOX3   | 11199 | 96.79  |
| X | 139585152 | 139587225 | SOX3   | 11199 | 96.79  |
| X | 146993469 | 147032645 | FMR1   | 3775  | 94.58  |
| X | 146993469 | 147032645 | FMR1   | 3775  | 94.58  |
| X | 146993469 | 147032645 | FMR1   | 3775  | 94.58  |
| X | 147582139 | 148082193 | AFF2   | 3776  | 99.29  |
| X | 148558521 | 148615470 | IDS    | 5389  | 98.97  |
| X | 149529689 | 149682448 | MAMLD1 | 2568  | 100.00 |
| X | 149737069 | 149841795 | MTM1   | 7448  | 89.74  |
| X | 151999511 | 152038273 | NSDHL  | 13398 | 100.00 |
| X | 151999511 | 152038273 | NSDHL  | 13398 | 100.00 |
| X | 152760397 | 152775012 | BGN    | 1044  | 100.00 |
| X | 152760397 | 152775012 | BGN    | 1044  | 100.00 |
| X | 152853377 | 152865500 | CCNQ   | 28434 | 77.19  |
| X | 152953554 | 152962048 | SLC6A8 | 11055 | 85.95  |
| X | 152965947 | 152990152 | BCAP31 | 16695 | 83.86  |
| X | 152990323 | 153010216 | ABCD1  | 61    | 73.01  |

|   |           |           |        |       |        |
|---|-----------|-----------|--------|-------|--------|
| X | 153126969 | 153174677 | L1CAM  | 6470  | 99.13  |
| X | 153126969 | 153174677 | L1CAM  | 6470  | 99.13  |
| X | 153126969 | 153174677 | L1CAM  | 6470  | 99.13  |
| X | 153126969 | 153174677 | L1CAM  | 6470  | 99.13  |
| X | 153194695 | 153200676 | NAA10  | 18704 | 100.00 |
| X | 153194695 | 153200676 | NAA10  | 18704 | 100.00 |
| X | 153194695 | 153200676 | NAA10  | 18704 | 100.00 |
| X | 153194695 | 153200676 | NAA10  | 18704 | 100.00 |
| X | 153213004 | 153237258 | HCFC1  | 4839  | 96.76  |
| X | 153213004 | 153237258 | HCFC1  | 4839  | 96.76  |
| X | 153287024 | 153363212 | MECP2  | 6990  | 100.00 |
| X | 153287024 | 153363212 | MECP2  | 6990  | 100.00 |
| X | 153287024 | 153363212 | MECP2  | 6990  | 100.00 |
| X | 153287024 | 153363212 | MECP2  | 6990  | 100.00 |
| X | 153287024 | 153363212 | MECP2  | 6990  | 100.00 |
| X | 153576892 | 153603006 | FLNA   | 3754  | 100.00 |
| X | 153576892 | 153603006 | FLNA   | 3754  | 100.00 |
| X | 153576892 | 153603006 | FLNA   | 3754  | 100.00 |
| X | 153576892 | 153603006 | FLNA   | 3754  | 100.00 |
| X | 153576892 | 153603006 | FLNA   | 3754  | 100.00 |
| X | 153576892 | 153603006 | FLNA   | 3754  | 100.00 |
| X | 153576892 | 153603006 | FLNA   | 3754  | 100.00 |
| X | 153576892 | 153603006 | FLNA   | 3754  | 100.00 |
| X | 153576892 | 153603006 | FLNA   | 3754  | 100.00 |
| X | 153639854 | 153650065 | TAZ    | 11577 | 100.00 |
| X | 153665266 | 153671814 | GDI1   | 4226  | 100.00 |
| X | 153665266 | 153671814 | GDI1   | 4226  | 100.00 |
| X | 153769414 | 153796782 | IKBKG  | 5961  | 78.89  |
| X | 153769414 | 153796782 | IKBKG  | 5961  | 78.89  |
| X | 153769414 | 153796782 | IKBKG  | 5961  | 78.89  |
| X | 153769414 | 153796782 | IKBKG  | 5961  | 78.89  |
| X | 153769414 | 153796782 | IKBKG  | 5961  | 78.89  |
| X | 153991031 | 154005964 | DKC1   | 2890  | 100.00 |
| X | 153991031 | 154005964 | DKC1   | 2890  | 100.00 |
| X | 154487526 | 154493874 | RAB39B | 16499 | 100.00 |
| Y | 2654896   | 2655740   | SRY    | 11311 | 94.96  |

**Supplementary Figure 1:** Organisational chart illustrating the role of the clinical review panel in the assessment of genetic variants detected in the PAGE study

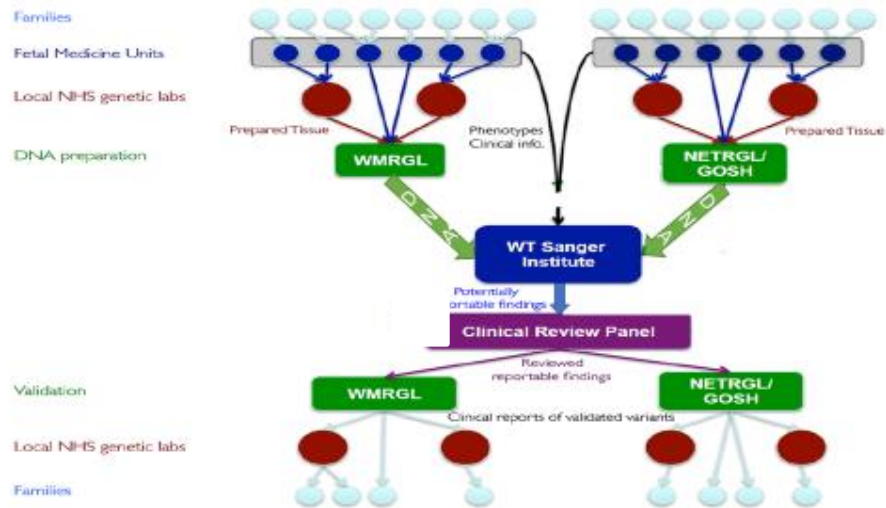

**Supplementary Figure 2:** Simplified (omitting quality control steps) overview of the bioinformatics pipeline.

## Pipeline overview (simplified)

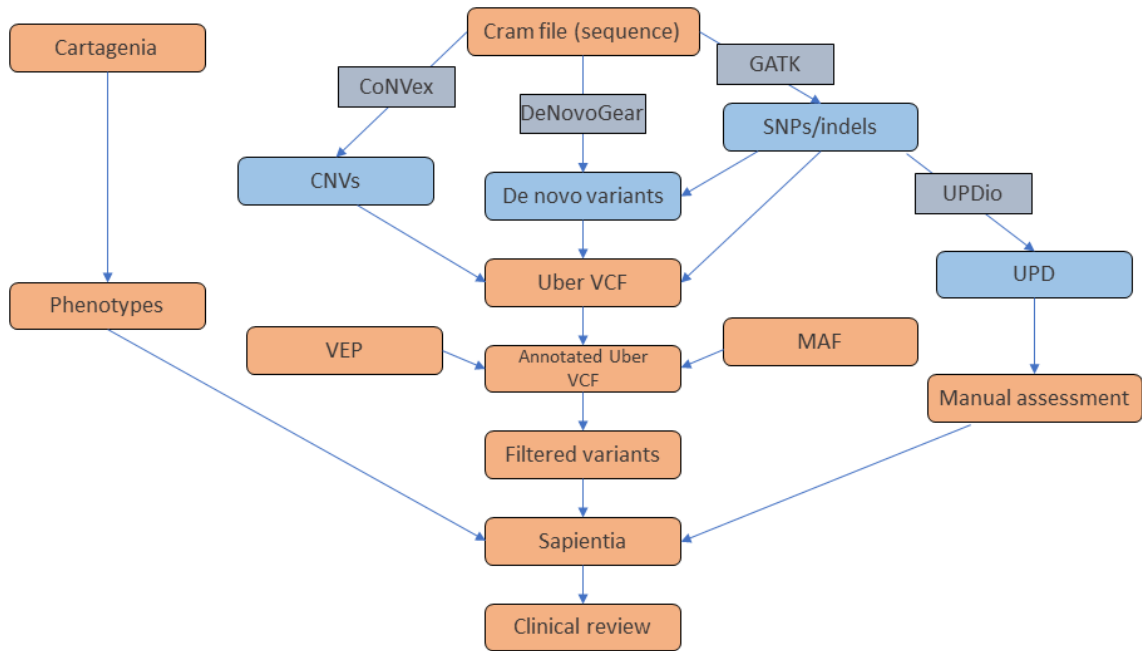

### Abbreviations:

CoNVex = copy number variation estimation in exome sequencing data

CNV = copy number variant

GATK = genome analysis toolkit (<https://software.broadinstitute.org/gatk/>)

MAF = minor allele frequency

UPD = uniparental disomy

UPDio = detecting uniparental disomy from trio genotypes

VEP = variant effect predictor ([www.ensembl.org/vep](http://www.ensembl.org/vep))

VCF = variant call format

### Case Study 1 (PP1579/ EGAN00001402048)

**Clinical Background:** An ultrasound scan at 20 weeks gestation revealed dysgenesis of the corpus callosum and lissencephaly. Quantitative Fluorescence (QF)-PCR to detect common aneuploidies and chromosomal microarray (CMA) did not reveal a pathogenic anomaly and the pregnancy was terminated at 20 weeks gestation.

**Whole exome sequencing (WES) variant data:** WES revealed an apparently *de novo* heterozygous NM\_178014.2:c.860C>T, p.(Pro287Leu) missense variant in the *TUBB* (formerly *TUBB5*) gene (MIM: 191330) in a highly conserved nucleotide (phyloP: 4.97 [-14.1;6.4]) and moderately conserved amino acid residue (considering 12 species) within the highly conserved C-terminus domain of the beta-tubulin protein. *In silico* tools predict a deleterious effect on protein function (SIFT: Deleterious, MutationTaster: disease causing, PolyPhen v2.0: possibly damaging). The variant is not previously published nor recorded in population or clinical databases (ExAC, gnomAD, dbSNP, HGMDPro, ClinVar or DECIPHER) (accessed 27<sup>th</sup> September 2016).

The  $\beta$ -tubulin gene *TUBB* is highly expressed in the developing cortex and monoallelic missense variants have been relatively recently described in a single publication in association with complex cortical dysplasia with other brain malformations-6 (CDCBM6; 615771), Breuss et al. (2012) in 3 postnatally ascertained children via WES. In addition several *de novo* missense variants are reported both in ClinVar and DECIPHER in association with cortical malformations and classified as pathogenic. A low rate of benign missense variation has been calculated for *TUBB* in the ExAC database (z-score=6.32).

**Clinical Review Panel (CRP) interpretation:** The p.(Pro287Leu) *TUBB* variant was classified as Likely Pathogenic using ACMG guidelines (Richards, 2015) based on being a *de novo* finding in a gene consistent with presenting phenotype with confirmation of parental identity (PS2); absence from control data (PM1); a missense variant in a gene with a low rate of benign missense variation in a gene in which missense variation is a reported mechanism of disease (PP2); and multiple lines of computational evidence supporting a deleterious impact (PP3). Bi-directional Sanger sequencing technically confirmed a *de novo* finding and the variant was reported likely to be pathogenic, fitting the fetal phenotype and with low recurrence risk. This case in particular illustrates the utility of open-access data sharing to assist interpretation and decision making in the clinical review process of emerging and rare genotype-phenotype associations.

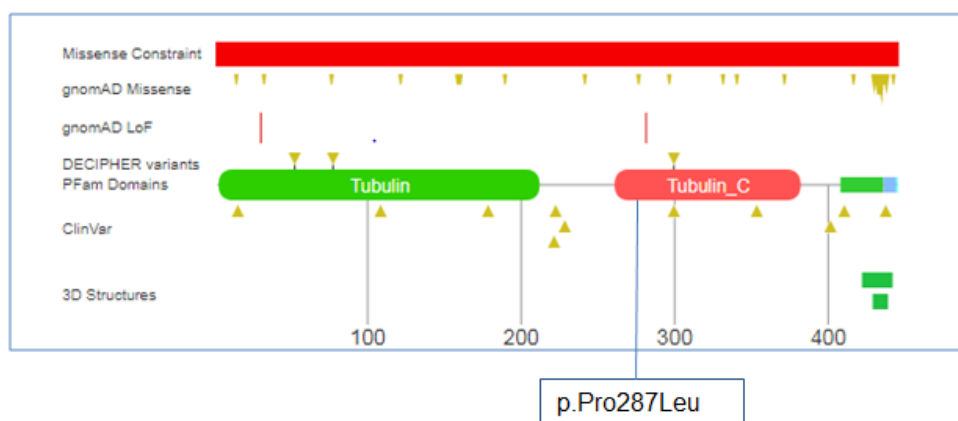

*Protein schematic of TUBB gene taken from DECIPHER highlighting variants deposited in ExAC, gnomAD, ClinVar and DECIPHER and location of p.(Pro287Leu) (date 27 Sep 2016)*



## Case Study 2 (PP0722/ EGAN00001366482)

*Clinical Background:* Raised nuchal translucency (6.7mm) was detected by USS at 13+2 in a 32 yr old G0P0 woman. QF-PCR and CMA were both normal. Subsequent scans from 17 weeks examining heart, kidneys and spine were all normal. An apparently healthy baby was delivered at 38 weeks weighing 3.1kg.

*Whole exome sequencing (WES) variant data:* an apparently de novo heterozygous NM\_003482.3:c.15535C>T (p.Arg5179Cys) missense variant in the *KMT2D* gene (MIM:602113) was detected in DNA extracted from chorionic villus sampling (CVS). The variant altered a moderately conserved nucleotide (phyloP: 3.92 [-14.1;6.4]) and highly conserved amino acid (to *C. elegans*) towards the –COOH terminal of the protein in exon 48 (NM\_003482.3). *In silico* tools predicted a deleterious effect on protein function (SIFT: Deleterious, MutationTaster: disease causing). The variant is not recorded in population databases (ExAC and gnomAD) (accessed 23<sup>rd</sup> September 2016).

Variants in the *KMT2D* (formerly *MLL2*) gene account for 55 to 80% of patients with Kabuki syndrome, an autosomal dominant, typically *de novo*, condition characterised by a distinct facial phenotype, developmental delay and mild to moderate intellectual disability and heterogeneous internal malformations involving heart, kidneys, gastrointestinal system, skeletal system and eyes (Banka et al. 2012). A diverse mutational spectrum is observed and notably de novo missense variants have been reported to cluster in exon 48 (Banka et al. 2012).

The c.15535C>T variant has been reported previously in association with Kabuki syndrome (Dentici et al. 2015; Bogershausen et al. 2016) in a single postnatal patient (without establishment of inheritance) and a further 2 cases are recorded in ClinVar with conflicting interpretations of pathogenicity. Multiple patients with two different missense changes, most of which are reported to be de novo, have been reported in the same amino acid (c.15536G>A p.(Arg5179His), (Ng et al. 2010; Hannibal et al. 2011; Miyake et al. 2013; Morgan et al. 2015; Bogershausen et al., 2016) and c.15536G>T p.(Arg5179Leu) (Bogershausen et al. 2016).

*Clinical Review Panel (CRP) interpretation:* The p.Arg5179Cys *KMT2D* variant was initially classified as a variant of uncertain significance (VUS) on account of insufficient or conflicting literature evidence and insufficient clinical evidence of features of Kabuki syndrome on ultrasound investigation. The CRP concluded however that technical validation, clinical reporting with a recommendation to follow-up postnatally were warranted. Following the further reports of the c.15535C>T in ClinVar, the variant was reassessed and considered to be likely pathogenic.

*Postnatal follow-up:* Clinical genetics review at 18 months following reporting of the PAGE-detected *KMT2D* variant revealed features consistent with a diagnosis of Kabuki syndrome: fetal pads, sacral dimple and arched eyebrows.

*Figure 2: Protein schematic of part of KMT2D taken from DECIPHER highlighting variants deposited in ExAC, gnomAD, ClinVar and DECIPHER and location of p.(Arg5179Cys) variant*

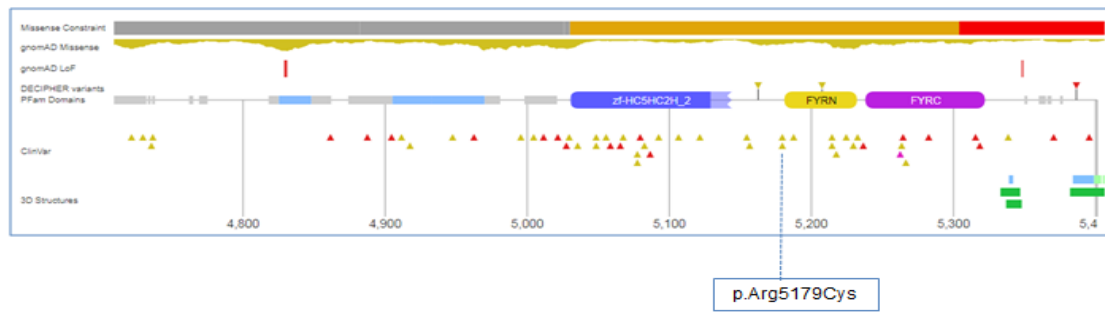

### Case Study 3 (PP0258/EGAN00001366802)

*Clinical Background:* Duodenal atresia (double bubble evident) was detected at 33+3 weeks. Amniocentesis and amniodrainage were carried out at 34+2 weeks. Dilatation of the distal oesophagus to the level of the diaphragm was noted at 35+1 weeks. A female infant weighing 2.8kg was delivered at 38+1 weeks and admitted to NICU before discharge for on-going care. Both mother and maternal uncle had duodenal atresia.

*Whole exome sequencing (WES) variant data:* a maternally inherited heterozygous NM\_005378.4:c.347T>C (p.Met116Thr) missense variant was detected in DNA extracted from amniocentesis sampling. The variant altered a highly conserved nucleotide (phyloP: 4.32 [-14.1;6.4]) and highly conserved amino acid (to Zebrafish) towards the N-terminal of the protein in exon 2 (NM\_005378.4). *In silico* tools predicted a deleterious effect on protein function (SIFT: Deleterious, MutationTaster: disease causing). The variant is not recorded in population databases (ExAC and gnomAD) (February 2017).

Variants in the *MYCN* gene account for over 65% of patients with Feingold Syndrome 1 (Oculodigitoesophagoduodenal Syndrome, ODED Syndrome), an autosomal dominant condition characterised by digital anomalies (shortening of the 2nd and 5th middle phalanx of the hand, clinodactyly of the 5th finger, syndactyly of toes 2-3 and/or 4-5, thumb hypoplasia), microcephaly, facial dysmorphism (short palpebral fissures and micrognathia), gastrointestinal atresias (primarily esophageal and/or duodenal), and mild to moderate learning disability. Approximately 60% of cases have an affected parent (Marcelis, 2008). All pathogenic variants currently identified are present in either exon 2 or 3 of *MYCN* and include protein truncating variants, deletions and missense variants in the DNA binding domain (Marcelis, 2008), as opposed to the Myc amino-terminal region observed in the current case.

*Clinical Review Panel (CRP) interpretation:* The p.Met116Thr variant was considered to be likely relevant to the fetal anomaly considering the *in silico* predictions of pathogenicity, allelic segregation and the clear relationship between the fetal and family history of duodenal atresia and pathogenic variants in *MYCN*. Confirmation of segregation in the affected maternal uncle was recommended. This case illustrated the importance of the availability of family history for variant interpretation and correct bioinformatics filtering.

*Figure 3: Protein schematic of MYCN taken from DECIPHER highlighting variants deposited in ExAC, gnomAD, ClinVar and DECIPHER and location of p.(Met116Thr) variant*

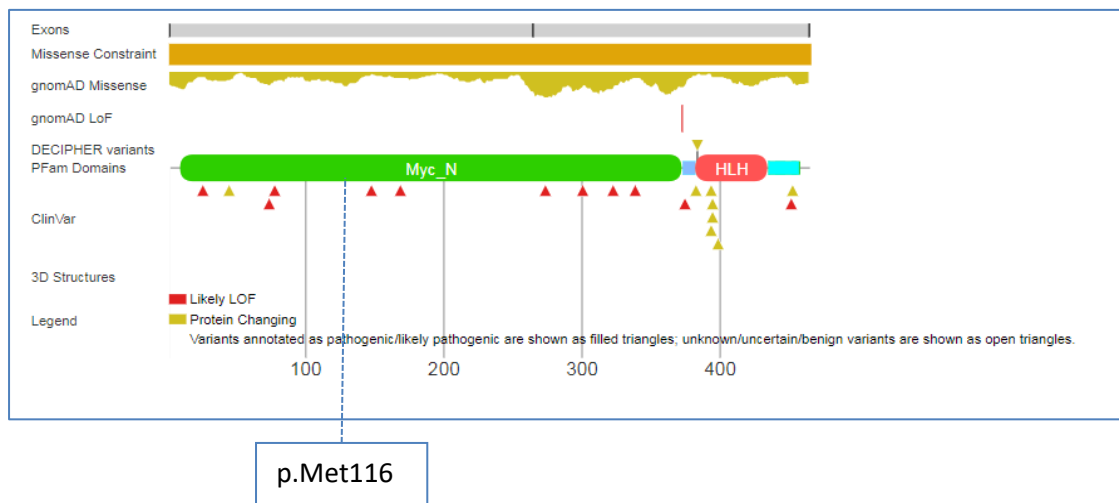

## References

- 1000 Genomes Project Consortium, Auton A, Brooks LD, Durbin RM, Garrison EP, Kang HM, Korbel JO, Marchini JL, McCarthy S, McVean GA, Abecasis GR. A global reference for human genetic variation. *Nature*. 2015;526:68-74
- Alamillo CL, Powis Z, Farwell K, Shahmirzadi L, Weltmer EC, Turocy J, Lowe T, Kobelka C, Chen E, Basel D, Ashkinadze E, D'Augelli L, Chao E, Tang S. Exome sequencing positively identified relevant alterations in more than half of cases with an indication of prenatal ultrasound anomalies. *Prenat Diagn*. 2015 Nov;35:1073-8
- Banka S, Veeramachaneni R, Reardon W, Howard E, Bunstone S, Ragge N, Parker MJ, Crow YJ, Kerr B, Kingston H, Metcalfe K, Chandler K, Magee A, Stewart F, McConnell VP, Donnelly DE, Berland S, Houge G, Morton JE, Oley C, Revencu N, Park SM, Davies SJ, Fry AE, Lynch SA, Gill H, Schweiger S, Lam WW, Tolmie J, Mohammed SN, Hobson E, Smith A, Blyth M, Bennett C, Vasudevan PC, García-Miñaur S, Henderson A, Goodship J, Wright MJ, Fisher R, Gibbons R, Price SM, C de Silva D, Temple IK, Collins AL, Lachlan K, Elmslie F, McEntagart M, Castle B, Clayton-Smith J, Black GC, Donnai D. How genetically heterogeneous is Kabuki syndrome?: MLL2 testing in 116 patients, review and analyses of mutation and phenotypic spectrum. *Eur J Hum Genet*. 2012;20:381-8
- Bögershausen N, Gatinois V, Riehmer V, Kayserili H, Becker J, Thoenes M, Simsek-Kiper PÖ, Barat-Houari M, Elcioglu NH, Wiczorek D, Tinschert S, Sarrabay G, Strom TM, Fabre A, Baynam G, Sanchez E, Nürnberg G, Altunoglu U, Capri Y, Isidor B, Lacombe D, Corsini C, Cormier-Daire V, Sanlaville D, Giuliano F, Le Quan Sang KH, Kayirangwa H, Nürnberg P, Meitinger T, Boduroglu K, Zoll B, Lyonnet S, Tzschach A, Verloes A, Di Donato N, Touitou I, Netzer C, Li Y, Geneviève D, Yigit G, Wollnik B. Mutation Update for Kabuki Syndrome Genes KMT2D and KDM6A and Further Delineation of X-Linked Kabuki Syndrome Subtype 2. *Hum Mutat*. 2016;37:847-64
- Breuss M, Heng JI, Poirier K, Tian G, Jaglin XH, Qu Z, Braun A, Gstrein T, Ngo L, Haas M, Bahi-Buisson N, Moutard ML, Passemard S, Verloes A, Gressens P, Xie Y, Robson KJ, Rani DS, Thangaraj K, Clausen T, Chelly J, Cowan NJ, Keays DA. Mutations in the  $\beta$ -tubulin gene TUBB5 cause microcephaly with structural brain abnormalities. *Cell Rep*. 2012;2:1554-62
- Carss KJ, Hillman SC, Parthiban V, McMullan DJ, Maher ER, Kilby MD, Hurles ME. Exome sequencing improves genetic diagnosis of structural fetal abnormalities revealed by ultrasound. *Hum Mol Genet*. 2014 Jun 15;23:3269-77
- Conomos MP, Reiner AP, Weir BS, Thornton TA. Model-free Estimation of Recent Genetic Relatedness. *Am J Hum Genet*. 2016;98:127-48
- Dentici ML, Di Pede A, Lepri FR, Gnazzo M, Lombardi MH, Auriti C, Petrocchi S, Pisaneschi E, Bellacchio E, Capolino R, Braguglia A, Angioni A, Dotta A, Digilio MC, Dallapiccola B. Kabuki syndrome: clinical and molecular diagnosis in the first year of life. *Arch Dis Child*. 2015;100:158-64
- Drury S, Williams H, Trump N, Boustred C; GOSGene, Lench N, Scott RH, Chitty LS. Exome sequencing for prenatal diagnosis of fetuses with sonographic abnormalities. *Prenat Diagn*. 2015;35:1010-7
- Hannibal MC, Buckingham KJ, Ng SB, Ming JE, Beck AE, McMillin MJ, Gildersleeve HI, Bigham AW, Tabor HK, Mefford HC, Cook J, Yoshiura K, Matsumoto T, Matsumoto N, Miyake N, Tonoki H, Naritomi K, Kaname T, Nagai T, Ohashi H, Kurosawa K, Hou JW, Ohta T, Liang D, Sudo A, Morris CA, Banka S, Black GC, Clayton-Smith J, Nickerson DA, Zackai EH, Shaikh TH, Donnai D, Niikawa N, Shendure J, Bamshad MJ. Spectrum of MLL2 (ALR) mutations in 110 cases of Kabuki syndrome. *Am J Med Genet A*. 2011;155A:1511-6

- King DA, Fitzgerald TW, Miller R, Canham N, Clayton-Smith J, Johnson D, Mansour S, Stewart F, Vasudevan P, Hurler ME; DDD Study. A novel method for detecting uniparental disomy from trio genotypes identifies a significant excess in children with developmental disorders. *Genome Res.* 2014;24:673-87
- Lek M, Karczewski KJ, Minikel EV, Samocha KE, Banks E, Fennell T, O'Donnell-Luria AH, Ware JS, Hill AJ, Cummings BB, Tukiainen T, Birnbaum DP, Kosmicki JA, Duncan LE, Estrada K, Zhao F, Zou J, Pierce-Hoffman E, Berghout J, Cooper DN, Deflaux N, DePristo M, Do R, Flannick J, Fromer M, Gauthier L, Goldstein J, Gupta N, Howrigan D, Kiezun A, Kurki MI, Moonshine AL, Natarajan P, Orozco L, Peloso GM, Poplin R, Rivas MA, Ruano-Rubio V, Rose SA, Ruderfer DM, Shakir K, Stenson PD, Stevens C, Thomas BP, Tiao G, Tusie-Luna MT, Weisburd B, Won HH, Yu D, Altshuler DM, Ardissino D, Boehnke M, Danesh J, Donnelly S, Elosua R, Florez JC, Gabriel SB, Getz G, Glatt SJ, Hultman CM, Kathiresan S, Laakso M, McCarroll S, McCarthy MI, McGovern D, McPherson R, Neale BM, Palotie A, Purcell SM, Saleheen D, Scharf JM, Sklar P, Sullivan PF, Tuomilehto J, Tsuang MT, Watkins HC, Wilson JG, Daly MJ, MacArthur DG; Exome Aggregation Consortium. Analysis of protein-coding genetic variation in 60,706 humans. *Nature.* 2016;536:285-91
- Manichaikul A, Mychaleckyj JC, Rich SS, Daly K, Sale M, Chen WM. Robust relationship inference in genome-wide association studies. *Bioinformatics.* 2010;26:2867-73
- Marcelis CL, Hol FA, Graham GE, Rieu PN, Kellermayer R, Meijer RP, Lugtenberg D, Scheffer H, van Bokhoven H, Brunner HG, de Brouwer AP. Genotype-phenotype correlations in MYCN-related Feingold syndrome. *Hum Mutat.* 2008;29(9):1125-32.
- McLaren W, Gil L, Hunt SE, Riat HS, Ritchie GR, Thormann A, Flicek P, Cunningham F. The Ensembl Variant Effect Predictor. *Genome Biology* 2016;17:122
- Miyake N, Koshimizu E, Okamoto N, Mizuno S, Ogata T, Nagai T, Kosho T, Ohashi H, Kato M, Sasaki G, Mabe H, Watanabe Y, Yoshino M, Matsuishi T, Takanashi J, Shotelersuk V, Tekin M, Ochi N, Kubota M, Ito N, Ihara K, Hara T, Tonoki H, Ohta T, Saito K, Matsuo M, Urano M, Enokizono T, Sato A, Tanaka H, Ogawa A, Fujita T, Hiraki Y, Kitanaka S, Matsubara Y, Makita T, Taguri M, Nakashima M, Tsurusaki Y, Saito H, Yoshiura K, Matsumoto N, Niikawa N. MLL2 and KDM6A mutations in patients with Kabuki syndrome. *Am J Med Genet A.* 2013;161A:2234-43
- Morgan AT, Mei C, Da Costa A, Fifer J, Lederer D, Benoit V, McMillin MJ, Buckingham KJ, Bamshad MJ, Pope K, White SM. Speech and language in a genotyped cohort of individuals with Kabuki syndrome. *Am J Med Genet A.* 2015;167:1483-92
- Narasimhan V, Danecek P, Scally A, Xue Y, Tyler-Smith C, Durbin R. BCFtools/RoH: a hidden Markov model approach for detecting autozygosity from next-generation sequencing data. *Bioinformatics.* 2016;32:1749-51
- Ng SB, Bigam AW, Buckingham KJ, Hannibal MC, McMillin MJ, Gildersleeve HI, Beck AE, Tabor HK, Cooper GM, Mefford HC, Lee C, Turner EH, Smith JD, Rieder MJ, Yoshiura K, Matsumoto N, Ohta T, Niikawa N, Nickerson DA, Bamshad MJ, Shendure J. Exome sequencing identifies MLL2 mutations as a cause of Kabuki syndrome. *Nat Genet.* 2010;42:790-3
- Pangalos C, Hagrefelt B, Lilakos K, Konialis C. First applications of a targeted exome sequencing approach in fetuses with ultrasound abnormalities reveals an important fraction of cases with associated gene defects. *Peer J* 2016;4:e1955
- Ramu A, Noordam MJ, Schwartz RS, Wuster A, Hurler ME, Cartwright RA, Conrad DF. DeNovoGear: de novo indel and point mutation discovery and phasing. *Nat Methods.* 2013;10:985-7
- UK10K Consortium, Walter K, Min JL, Huang J, Crooks L, Memari Y, McCarthy S, Perry JR, Xu C, Futema M, Lawson D, Iotchkova V, Schiffels S, Hendricks AE, Danecek P, Li R, Floyd J, Wain

- LV, Barroso I, Humphries SE, Hurles ME, Zeggini E, Barrett JC, Plagnol V, Richards JB, Greenwood CM, Timpson NJ, Durbin R, Soranzo N. The UK10K project identifies rare variants in health and disease. *Nature*. 2015;526:82-90
- Van der Auwera GA, Carneiro MO, Hartl C, Poplin R, Del Angel G, Levy-Moonshine A, Jordan T, Shakir K, Roazen D, Thibault J, Banks E, Garimella KV, Altshuler D, Gabriel S, DePristo MA. From FastQ data to high confidence variant calls: the Genome Analysis Toolkit best practices pipeline. *Curr Protoc Bioinformatics* 2013;43:11.10.1-33
- Vora NL, Powell B, Brandt A, Strande N, Hardisty E, Gilmore K, Foreman AKM, Wilhelmsen K, Bizon C, Reilly J, Owen P, Powell CM, Skinner D, Rini C, Lyerly AD, Boggess KA, Weck K, Berg JS, Evans JP. Prenatal exome sequencing in anomalous fetuses: new opportunities and challenges. *Genet Med*. 2017 May 18. Doi: 10.1038/gim.2017.33. [Epub ahead of print] PubMed PMID: 28518170.
- Westerfield LE, Stover SR, Mathur VS, Nassef SA, Carter TG, Yang Y, Eng CM, Van den Veyver IB. Reproductive genetic counseling challenges associated with diagnostic exome sequencing in a large academic private reproductive genetic counseling practice. *Prenat Diagn*. 2015;35:1022-9
- Wright CF, Fitzgerald TW, Jones WD, Clayton S, McRae JF, van Kogelenberg M, King DA, Ambridge K, Barrett DM, Bayzietinova T, Bevan AP, Bragin E, Chatzimichali EA, Gribble S, Jones P, Krishnappa N, Mason LE, Miller R, Morley KI, Parthiban V, Prigmore E, Rajan D, Sifrim A, Swaminathan GJ, Tivey AR, Middleton A, Parker M, Carter NP, Barrett JC, Hurles ME, FitzPatrick DR, Firth HV; DDD study. Genetic diagnosis of developmental disorders in the DDD study: a scalable analysis of genome-wide research data. *Lancet*. 2015;385:1305-14
- Yang Y, Muzny DM, Reid JG, Bainbridge MN, Willis A, Ward PA, Braxton A, Beuten J, Xia F, Niu Z, Hardison M, Person R, Bekheirnia MR, Leduc MS, Kirby A, Pham P, Scull J, Wang M, Ding Y, Plon SE, Lupski JR, Beaudet AL, Gibbs RA, Eng CM. Clinical whole-exome sequencing for the diagnosis of mendelian disorders. *N Engl J Med*. 2013;369:1502-11
- Yang Y, Muzny DM, Xia F, et al. Molecular findings among patients referred for clinical whole-exome sequencing. *JAMA* 2014;312:1870–1879.
- Yates CL, Monaghan KG, Copenheaver D, Retterer K, Scuffins J, Kucera CR, Friedman B, Richard G, Juusola J. Whole-exome sequencing on deceased fetuses with ultrasound anomalies: expanding our knowledge of genetic disease during fetal development. *Genet Med*. 2017 Apr 20. doi: 10.1038/gim.2017.31. [Epub ahead of print] PubMed PMID: 28425981.
